# Supplementary material for: Evidence for Divergent Evolution of Growth Temperature Preference in Sympatric Saccharomyces Species
Source: PLOS journal article supplement (doi:10.1371/journal.pone.0020739), 2011-06-02

**Figure S1. Outcome of competition between sympatric *Saccharomyces* species.** Relative fitness of *S. paradoxus* ZP 551 competing with *S. uvarum* ZP 555 at different temperatures is shown. The relative size of the populations of both species was determined in the beginning and at the end of each co-culture experiment by qRT-PCR using species specific primers and was used to calculate the relative fitness of each species.

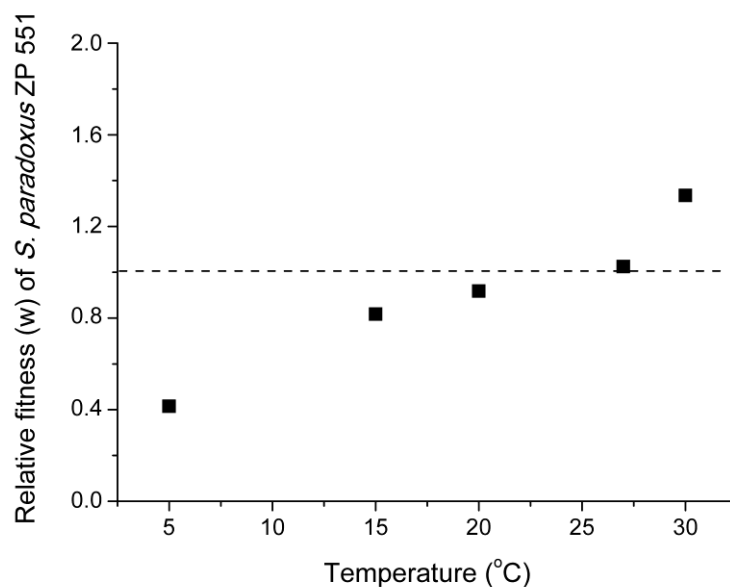

Supplement: S1 (10.1371/journal.pone.0020739.s001) [file journal.pone.0020739.s001]
