# Supplementary material for: Evidence for Divergent Evolution of Growth Temperature Preference in Sympatric Saccharomyces Species
Source: PLOS journal article supplement (doi:10.1371/journal.pone.0020739), 2011-06-02

**Figure S3.** Relative expression of the *HXK1* (grey) and *HXK2* (black) genes determined by RT-Real Time PCR in six strains belonging to *Saccharomyces cerevisiae*, *S. uvarum* and *S. kudriavzevii*, as indicated.

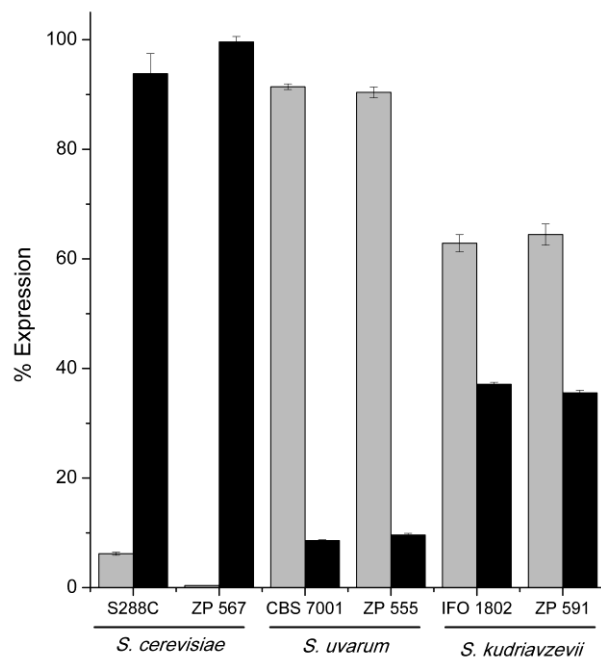

Supplement: S3 (10.1371/journal.pone.0020739.s003) [file journal.pone.0020739.s003]
