# Supplementary material for: Evidence for Divergent Evolution of Growth Temperature Preference in Sympatric Saccharomyces Species
Source: PLoS One. 2011 Jun 2;6(6):e20739. doi: 10.1371/journal.pone.0020739 (PMC3107239; doi:10.1371/journal.pone.0020739)
Supplement: Table S2 — dN, dS and dN/dS ratios determined for Saccharomyces ORFeomes between S. paradoxus and S. cerevisiae and between S. uvarum and S. cerevisiae. (XLS) [file pone.0020739.s006.xls]

## Sheet: dN, dS data
Table S2: dN, dS and dN/dS ratios determined for Saccharomyces ORFeomes between S. paradoxus and S. cerevisiae and between S. uvarum and S. cerevisiae.
			SparScer			SuvaScer
	ORF code	Gene name	dN	dS	dN/dS	dN	dS	dN/dS		Codon Wise Alignment
	YHL015W	RPS20	0	0.0459	0	0	0.1319	0
	YOR369C	RPS12	0	0.1592	0	0	0.2554	0		Global alignment of the ORF product sequences was performed
	YDR404C	RPB7	0	0.2894	0	0	0.775	0		by Emboss: stretcher under an apropriate substitution matrix.
	YOR210W	RPB10	0	0.198	0	0	0.9089	0		The aligned sequences were subsequently reverted to the original
	YNL031C	HHT2	0	0.1581	0	0	0.2396	0		codons.
	YPR165W	RHO1	0	0.1806	0	0	0.4483	0
	YEL027W	CUP5	0	0.0705	0	0	0.3789	0		Li93's Method (PAML, yn00.exe documentation)
	YGR027C	RPS25A	0	0.1215	0	0	0.098	0
	YGL058W	RAD6	0	0.522	0	0	0.8848	0		For each pairwise comparisons, the 0-fold, 2-fold and
	YML129C	COX14	0	0.3649	0	0	0.9222	0		4-fold degenerate sites are counted for each sequences.
	YFL039C	ACT1	0	0.1006	0	0	0.2166	0		The average of the two sequences is reported as Sites.
	YBR010W	HHT1	0	0.1817	0	0	0.2069	0		The two sequences are then compared codon by codon, and
	YEL026W	SNU13	0	0.1009	0	0	0.2465	0		the number of transitions and transversions at each of
	YDR225W	HTA1	0	0.1665	0	0	0.2164	0		the three categories of sites are counted, and reported
	YCR039C	MATALPHA2	0	0.0178	0	0	0.0238	0		as Ns, Nv.
	YBR088C	POL30	0	0.3549	0	0.0017	2.1995	0.000772903
	YIL053W	RHR2	0	0.1847	0	0.0021	0.263	0.00798479		Kimura's two-parameter method is then applied to correct
	YML001W	YPT7	0	0.1827	0	0.0022	0.6554	0.00335673		for multiple hits, yielding the corrected number of
	YDL192W	ARF1	0	0.1379	0	0.0023	0.39	0.00589744		transitions and transversions as A and B.\n
	YPL218W	SAR1	0	0.3239	0	0.0028	0.7253	0.00386047		Estimated synonymous and nonsynonymous substitutions
	YKL013C	ARC19	0	0.1966	0	0.0028	0.9307	0.00300849		according to the Li93 method are shown as dN and dS,
	YNL006W	LST8	0	0.3169	0	0.0031	1.1771	0.00263359		together with their respective standard error.
	YBR109C	CMD1	0	0.2206	0	0.0031	0.9447	0.00328147
	YDR224C	HTB1	0	0.1718	0	0.0035	0.2914	0.012011
	YJL190C	RPS22A	0	0.0275	0	0.0036	0.1595	0.0225705		SparScer	Comparison between the S. cerevisiae and S. paradoxus genomes
	YER148W	SPT15	0	0.27	0	0.0037	0.9148	0.0040446		SuvaScer	Comparison between the S. cerevisiae and S. uvarum genomes
	YGL070C	RPB9	0	0.3579	0	0.0037	1.1704	0.00316131		dN	number of nonsynonymous substitutions per nonsynonymous site
	YCR009C	RVS161	0	0.2421	0	0.0038	0.6514	0.00583359		dS	number of synonymous substitutions per synonymous site
	YER117W	RPL23B	0	0.0989	0	0.0039	0.2486	0.0156879
	YGL189C	RPS26A	0	0.0746	0	0.0039	0.1206	0.0323383
	YJR123W	RPS5	0	0.0424	0	0.004	0.0792	0.0505051
	YGL103W	RPL28	0	0.1519	0	0.004	0.1659	0.0241109
	YDL007W	RPT2	0	0.2263	0	0.0041	0.9765	0.00419867
	YOL139C	CDC33	0	0.1621	0	0.0041	0.3909	0.0104886
	YFL038C	YPT1	0	0.3219	0	0.0044	1.2982	0.00338931
	YBR082C	UBC4	0	0.2246	0	0.0045	0.4143	0.0108617
	YLR441C	RPS1A	0	0.079	0	0.0052	0.2067	0.0251572
	YEL020W-A	TIM9	0	0.1922	0	0.0055	0.8159	0.00674102
	YDR418W	RPL12B	0	0.136	0	0.0056	0.1697	0.0329994
	YEL054C	RPL12A	0	0.1342	0	0.0058	0.2403	0.0241365
	YML085C	TUB1	0	0.182	0	0.0059	0.462	0.0127706
	YOR185C	GSP2	0	0.3103	0	0.0063	0.6487	0.00971173
	YDR320C-A	DAD4	0	0.2875	0	0.0066	0.7318	0.00901886
	YBR135W	CKS1	0	0.2654	0	0.0067	1.2663	0.00529101
	YHR132W-A	IGO2	0	0.3214	0	0.007	0.9996	0.0070028
	YOR167C	RPS28A	0	0.0357	0	0.007	0.0748	0.0935829
	YLR264W	RPS28B	0	0.0175	0	0.007	0.236	0.029661
	YNL244C	SUI1	0	0.0943	0	0.0072	2.8699	0.0025088
	YOL005C	RPB11	0	0.3105	0	0.0074	0.962	0.00769231
	YBR164C	ARL1	0	0.3025	0	0.0074	0.8859	0.00835309
	YDR045C	RPC11	0	0.2478	0	0.008	0.7178	0.0111452
	YFR032C-A	RPL29	0	0.0547	0	0.0083	0.0955	0.086911
	YOR020C	HSP10	0	0.1721	0	0.0088	0.7466	0.0117868
	YDR276C	PMP3	0	0.1801	0	0.0091	0.2184	0.0416667
	YBR191W	RPL21A	0	0.0671	0	0.0094	0.1467	0.0640763
	YML063W	RPS1B	0	0.0901	0	0.0094	0.1151	0.0816681
	YDR032C	PST2	0	0.305	0	0.0098	0.7241	0.013534
	YPR102C	RPL11A	0	0.1564	0	0.0101	0.3888	0.0259774
	YML009C	MRPL39	0	0.3996	0	0.0104	0.9644	0.0107839
	YLR038C	COX12	0	0.3333	0	0.0105	3.9845	0.00263521
	YDR155C	CPR1	0	0.2014	0	0.0108	0.3836	0.0281543
	YER072W	VTC1	0	0.2418	0	0.0112	0.5695	0.0196664
	YKL170W	MRPL38	0	0.4058	0	0.0117	1.3337	0.00877259
	YER009W	NTF2	0	0.6733	0	0.0118	0.7494	0.0157459
	YER126C	NSA2	0	0.2903	0	0.0123	0.764	0.0160995
	YHR143W-A	RPC10	0	0.3147	0	0.0129	1.0464	0.012328
	YPL131W	RPL5	0	0.0717	0	0.0131	0.137	0.0956204
	YMR260C	TIF11	0	0.4872	0	0.0134	0.7732	0.0173306
	YHR005C-A	MRS11	0	0.6259	0	0.0135	1.2083	0.0111727
	YDR510W	SMT3	0	0.323	0	0.0138	0.9087	0.0151865
	YJR007W	SUI2	0	0.2938	0	0.014	0.4761	0.0294056
	YKL196C	YKT6	0	0.3575	0	0.0142	1.2753	0.0111346
	YER179W	DMC1	0	0.3447	0	0.0143	1.1816	0.0121022
	YNL330C	RPD3	0	0.0217	0	0.0151	1.5791	0.00956241
	YJR058C	APS2	0	0.2716	0	0.0164	0.9328	0.0175815
	YGL123W	RPS2	0	0.0454	0	0.017	0.1446	0.117566
	YJL166W	QCR8	0	0.323	0	0.018	1.386	0.012987
	YKL001C	MET14	0	0.3579	0	0.0185	1.0613	0.0174315
	YBL049W	MOH1	0	0.2226	0	0.0186	0.8659	0.0214805
	YPL037C	EGD1	0	0.1432	0	0.0187	0.289	0.0647059
	YLR043C	TRX1	0	0.1824	0	0.0188	0.5105	0.0368266
	YAL030W	SNC1	0	0.2651	0	0.0192	1.0225	0.0187775
	YER131W	RPS26B	0	0.2083	0	0.0194	0.3701	0.0524183
	YMR256C	COX7	0	0.3289	0	0.02	0.5689	0.0351556
	YGL019W	CKB1	0	0.2336	0	0.0217	0.6636	0.0327004
	YOR312C	RPL20B	0	0.0955	0	0.0242	0.1797	0.134669
	YGR037C	ACB1	0	0.2704	0	0.0255	0.7395	0.0344828
	YLR388W	RPS29A	0	0.1082	0	0.0323	0.1638	0.197192
	YGL031C	RPL24A	0	0.1162	0	0.0328	0.2395	0.136952
	YNR037C	RSM19	0	0.5533	0	0.0329	1.3237	0.0248546
	YNL070W	TOM7	0	0.2547	0	0.0347	0.4583	0.0757146
	YOR094W	ARF3	0	0.2552	0	0.0353	0.8334	0.0423566
	YHR181W	SVP26	0	0.0424	0	0.0354	0.5612	0.0630791
	YJR034W	PET191	0	0.7038	0	0.0355	1.3732	0.025852
	YNL323W	LEM3	0	0.012	0	0.058	1.0822	0.0535945
	YLR327C	TMA10	0	1.4394	0	0.0604	2.1855	0.0276367
	YER019C-A	SBH2	0	0.2448	0	0.0645	0.9384	0.068734
	YNL178W	RPS3	0	0.1124	0	0.0863	0.3401	0.253749
	YDR064W	RPS13	0	0.1219	0	1.1127	1.6801	0.662282
	YNL321W	VNX1	0.0005	0.0156	0.0320513	0.051	1.5648	0.032592
	YNL325C	FIG4	0.0005	0.0089	0.0561798	0.0549	1.0301	0.0532958
	YDL229W	SSB1	0.0007	0.119	0.00588235	0.009	0.132	0.0681818
	YBR196C	PGI1	0.0008	0.2581	0.00309957	0.0119	0.6799	0.0175026
	YDR037W	KRS1	0.0008	0.0062	0.129032	0.0237	0.5928	0.0399798
	YJR121W	ATP2	0.0009	0.2604	0.00345622	0.0034	0.5715	0.00594926
	YOR117W	RPT5	0.001	0.3639	0.00274801	0.0021	0.9941	0.00211246
	YPL235W	RVB2	0.001	0.3364	0.00297265	0.0031	1.0507	0.00295041
	YDL084W	SUB2	0.001	0.286	0.0034965	0.0034	0.9376	0.00362628
	YFL037W	TUB2	0.001	0.2344	0.00426621	0.0069	0.7343	0.0093967
	YER136W	GDI1	0.001	0.3562	0.00280741	0.0115	1.5382	0.00747627
	YKR059W	TIF1	0.0011	0.1284	0.00856698	0.0148	0.2345	0.063113
	YGR254W	ENO1	0.0011	0.0691	0.015919	0.0307	0.2866	0.107118
	YHR174W	ENO2	0.0011	0.0282	0.0390071	0.036	0.2137	0.16846
	YKL008C	LAC1	0.0011	0.2085	0.00527578	0.0508	0.9377	0.0541751
	YDL055C	PSA1	0.0013	0.1979	0.00656897	0.0185	1.0013	0.018476
	YPR086W	SUA7	0.0013	0.4175	0.00311377	0.0189	0.7403	0.0255302
	YKL104C	GFA1	0.0013	0.3077	0.00422489	0.0194	1.0382	0.0186862
	YDR035W	ARO3	0.0013	0.1399	0.00929235	0.0205	1.1748	0.0174498
	YPL266W	DIM1	0.0014	0.3776	0.00370763	0.015	1.0452	0.0143513
	YLR447C	VMA6	0.0014	0.177	0.0079096	0.0217	0.7296	0.0297423
	YMR146C	TIF34	0.0014	0.2076	0.00674374	0.0226	0.6758	0.0334418
	YDR075W	PPH3	0.0015	0.3844	0.00390219	0.0068	1.008	0.00674603
	YGL148W	ARO2	0.0015	0.4081	0.00367557	0.0133	1.2045	0.0110419
	YOR151C	RPB2	0.0016	0.3182	0.00502828	0.0075	1.2761	0.00587728
	YDL126C	CDC48	0.0016	0.3967	0.00403327	0.0101	0.9278	0.010886
	YLR044C	PDC1	0.0016	0.0752	0.0212766	0.0144	0.1413	0.101911
	YDR099W	BMH2	0.0017	0.2946	0.00577054	0.0084	0.7297	0.0115116
	YMR217W	GUA1	0.0017	0.2358	0.0072095	0.0121	1.1314	0.0106947
	YOR133W	EFT1	0.0017	0.1119	0.0151921	0.0129	0.1905	0.0677165
	YBL099W	ATP1	0.0017	0.2591	0.00656117	0.0147	0.5382	0.0273133
	YCR010C	ADY2	0.0017	0.4367	0.00389283	0.071	1.279	0.0555121
	YIL142W	CCT2	0.0018	0.3846	0.00468019	0.013	1.5559	0.00835529
	YMR300C	ADE4	0.0018	0.3114	0.00578035	0.0169	1.5211	0.0111104
	YNL055C	POR1	0.0018	0.3549	0.00507185	0.023	1.332	0.0172673
	YML092C	PRE8	0.0019	0.2803	0.00677845	0.0054	0.9003	0.005998
	YPR016C	TIF6	0.0019	0.2182	0.00870761	0.0058	0.4486	0.0129291
	YLR058C	SHM2	0.0019	0.2041	0.00930916	0.0118	0.3899	0.0302642
	YER177W	BMH1	0.0019	0.228	0.00833333	0.0149	0.6791	0.0219408
	YBR080C	SEC18	0.0019	0.357	0.00532213	0.0156	1.3174	0.0118415
	YGL253W	HXK2	0.0019	0.2053	0.00925475	0.028	0.5413	0.0517273
	YDR036C	EHD3	0.0019	0.012	0.158333	0.0909	0.8836	0.102875
	YBR143C	SUP45	0.002	0.4614	0.00433463	0.0123	1.3008	0.00945572
	YMR314W	PRE5	0.002	0.2025	0.00987654	0.0133	0.6837	0.019453
	YDL185W	TFP1	0.0021	0.2054	0.010224	0.0084	0.6701	0.0125354
	YER031C	YPT31	0.0021	0.2898	0.00724638	0.0159	0.6624	0.0240036
	YLR347C	KAP95	0.0021	0.3399	0.00617829	0.0237	0.9922	0.0238863
	YKL152C	GPM1	0.0021	0.1034	0.0203095	0.0364	0.1611	0.225947
	YBR035C	PDX3	0.0021	0.3181	0.0066017	0.0464	1.8141	0.0255774
	YLR293C	GSP1	0.0022	0.1286	0.0171073	0	0.271	0
	YFL005W	SEC4	0.0022	0.255	0.00862745	0.0045	0.7092	0.00634518
	YGL135W	RPL1B	0.0022	0.0652	0.0337423	0.0111	0.1508	0.0736074
	YGL048C	RPT6	0.0023	0.3175	0.00724409	0.0055	1.825	0.0030137
	YDR502C	SAM2	0.0023	0.3001	0.00766411	0.0151	1.2134	0.0124444
	YHR107C	CDC12	0.0023	0.3772	0.00609756	0.0161	1.1227	0.0143404
	YKL080W	VMA5	0.0023	0.2919	0.00787941	0.0189	0.6704	0.0281921
	YKR035W-A	DID2	0.0023	0.4259	0.00540033	0.0246	1.9057	0.0129086
	YDL022W	GPD1	0.0023	0.3442	0.00668216	0.0246	1.1018	0.0223271
	YPR181C	SEC23	0.0024	0.3301	0.00727052	0.0123	1.5166	0.00811025
	YJL001W	PRE3	0.0024	0.4093	0.00586367	0.0177	1.0565	0.0167534
	YLR009W	RLP24	0.0024	0.2272	0.0105634	0.0242	0.6017	0.0402194
	YER165W	PAB1	0.0025	0.155	0.016129	0.0098	0.5273	0.0185852
	YLL026W	HSP104	0.0025	0.4423	0.00565227	0.0152	0.8912	0.0170557
	YLR153C	ACS2	0.0025	0.4645	0.00538213	0.0177	0.7068	0.0250424
	YGR040W	KSS1	0.0025	0.4353	0.00574317	0.0177	2.647	0.00668682
	YHR148W	IMP3	0.0025	0.2367	0.0105619	0.0765	1.5361	0.0498014
	YDL029W	ARP2	0.0026	0.4421	0.00588102	0.008	1.2034	0.00664783
	YBL015W	ACH1	0.0026	0.3795	0.00685112	0.0171	1.6062	0.0106462
	YDR516C	EMI2	0.0026	0.4104	0.00633528	0.0212	1.112	0.0190647
	YPR149W	NCE102	0.0026	0.2514	0.0103421	0.0691	0.513	0.134698
	YOR257W	CDC31	0.0027	0.5471	0.00493511	0.0058	1.3075	0.00443595
	YDL143W	CCT4	0.0027	0.3052	0.00884666	0.0143	0.8135	0.0175784
	YDR044W	HEM13	0.0027	0.3961	0.00681646	0.0168	0.9074	0.0185144
	YDR460W	TFB3	0.0027	0.445	0.00606742	0.02	0.7301	0.0273935
	YLR377C	FBP1	0.0027	0.4127	0.00654228	0.0366	1.1995	0.0305127
	YHL011C	PRS3	0.0028	0.3942	0.00710299	0.0027	1.1577	0.00233221
	YOR061W	CKA2	0.0028	0.2129	0.0131517	0.0098	1.0401	0.00942217
	YOR271C	FSF1	0.0028	0.3704	0.0075594	0.014	1.056	0.0132576
	YGR010W	NMA2	0.0028	0.3894	0.00719055	0.0169	1.7171	0.00984218
	YIL021W	RPB3	0.0028	0.3252	0.00861009	0.0213	1.2427	0.0171401
	YBR054W	YRO2	0.0028	0.2745	0.0102004	0.0356	0.6487	0.054879
	YDL014W	NOP1	0.0028	0.2276	0.0123023	0.0416	0.7858	0.0529397
	YKL035W	UGP1	0.0028	0.3335	0.0083958	0.0545	1.1678	0.046669
	YFR004W	RPN11	0.0029	0.362	0.00801105	0.0044	1.0237	0.00429813
	YOR310C	NOP58	0.0029	0.2831	0.0102437	0.0092	0.8776	0.0104831
	YER036C	ARB1	0.0029	0.2815	0.010302	0.0158	0.6324	0.0249842
	YKL056C	TMA19	0.0029	0.0987	0.029382	0.0213	0.2216	0.0961191
	YMR241W	YHM2	0.0029	0.2423	0.0119686	0.0274	0.7806	0.0351012
	YOR207C	RET1	0.003	0.4424	0.00678119	0.0117	1.6006	0.00730976
	YLR167W	RPS31	0.0031	0.1227	0.0252649	0.0028	0.208	0.0134615
	YPL086C	ELP3	0.0031	0.407	0.00761671	0.003	1.0292	0.00291489
	YIL065C	FIS1	0.0031	0.3727	0.00831768	0.0087	1.2588	0.00691134
	YLR259C	HSP60	0.0031	0.3859	0.00803317	0.0098	2.595	0.00377649
	YBR126C	TPS1	0.0031	0.2743	0.0113015	0.0109	2.6015	0.00418989
	YJR065C	ARP3	0.0031	0.2834	0.0109386	0.011	0.6647	0.0165488
	YGR240C	PFK1	0.0031	0.3392	0.00913915	0.0133	1.0403	0.0127848
	YNL075W	IMP4	0.0031	0.2713	0.0114265	0.0193	0.9883	0.0195285
	YOR298C-A	MBF1	0.0031	0.3488	0.00888761	0.0327	1.775	0.0184225
	YPL232W	SSO1	0.0031	0.4119	0.0075261	0.0382	0.5976	0.0639224
	YEL013W	VAC8	0.0032	0.3121	0.0102531	0.0083	1.3469	0.0061623
	YER025W	GCD11	0.0032	0.2932	0.0109141	0.0137	0.7826	0.0175058
	YDR212W	TCP1	0.0032	0.3386	0.00945068	0.0152	1.3139	0.0115686
	YBR127C	VMA2	0.0033	0.2133	0.0154712	0.0088	0.5726	0.0153685
	YER125W	RSP5	0.0033	0.3419	0.00965195	0.0141	1.2317	0.0114476
	YBL021C	HAP3	0.0033	0.3006	0.010978	0.0144	3.294	0.00437158
	YMR120C	ADE17	0.0033	0.4463	0.00739413	0.0152	1.0008	0.0151878
	YJL014W	CCT3	0.0033	0.3577	0.00922561	0.0179	0.8673	0.0206388
	YJR064W	CCT5	0.0033	0.3462	0.00953206	0.0193	0.793	0.024338
	YDL208W	NHP2	0.0033	0.4879	0.00676368	0.0328	0.961	0.0341311
	YCR031C	RPS14A	0.0034	0.1562	0.021767	0.005	0.1303	0.038373
	YGL190C	CDC55	0.0034	0.2229	0.0152535	0.0116	1.3147	0.00882331
	YER171W	RAD3	0.0034	0.3853	0.00882429	0.0129	0.9249	0.0139475
	YOL012C	HTZ1	0.0034	0.2129	0.0159699	0.0138	0.866	0.0159353
	YEL051W	VMA8	0.0034	0.2098	0.0162059	0.0158	0.6102	0.0258931
	YDR513W	GRX2	0.0034	0.2903	0.011712	0.0227	0.4804	0.0472523
	YLR378C	SEC61	0.0035	0.3548	0.00986471	0.0092	0.9065	0.0101489
	YJR045C	SSC1	0.0035	0.3093	0.0113159	0.0119	0.5696	0.0208919
	YLR355C	ILV5	0.0035	0.0768	0.0455729	0.0141	0.1985	0.0710327
	YOR204W	DED1	0.0035	0.3668	0.00954198	0.02	0.7255	0.0275672
	YHR208W	BAT1	0.0035	0.3972	0.00881168	0.026	0.8956	0.0290308
	YKL058W	TOA2	0.0036	0.3002	0.011992	0.0036	1.0355	0.00347658
	YGR267C	FOL2	0.0036	0.3745	0.00961282	0.0131	1.2146	0.0107854
	YJR016C	ILV3	0.0036	0.3703	0.00972185	0.0155	0.5965	0.0259849
	YOL038W	PRE6	0.0036	0.2963	0.0121498	0.0155	0.6761	0.0229256
	YNL135C	FPR1	0.0037	0.1393	0.0265614	0.004	0.3294	0.0121433
	YGR144W	THI4	0.0037	0.4284	0.00863679	0.0136	1.2057	0.0112798
	YLR186W	EMG1	0.0037	0.2318	0.015962	0.0146	0.7844	0.018613
	YMR083W	ADH3	0.0037	0.3528	0.0104875	0.0181	1.0525	0.0171971
	YGR173W	RBG2	0.0037	0.3302	0.0112053	0.0209	1.9593	0.0106671
	YEL021W	URA3	0.0037	0.3885	0.00952381	0.0236	1.1503	0.0205164
	YIL106W	MOB1	0.0038	0.437	0.00869565	0.0141	1.5831	0.00890658
	YJR063W	RPA12	0.0038	0.2087	0.018208	0.0146	0.9825	0.0148601
	YGR195W	SKI6	0.0038	0.2962	0.0128292	0.0171	1.5242	0.011219
	YHR008C	SOD2	0.0038	0.4393	0.00865013	0.0191	0.6923	0.0275892
	YKR097W	PCK1	0.0038	0.5215	0.00728667	0.02	2.0392	0.00980777
	YGL054C	ERV14	0.0038	0.2361	0.0160949	0.0207	0.8227	0.0251611
	YBL078C	ATG8	0.0039	0.3274	0.011912	0.0036	2.447	0.00147119
	YBL041W	PRE7	0.0039	0.2857	0.0136507	0.0061	0.6494	0.00939329
	YBL068W	PRS4	0.0039	0.4419	0.00882553	0.0165	1.4974	0.0110191
	YHR088W	RPF1	0.0039	0.3479	0.0112101	0.0171	1.2035	0.0142086
	YNR016C	ACC1	0.0039	0.3657	0.0106645	0.0174	0.8798	0.0197772
	YMR186W	HSC82	0.0039	0.3192	0.012218	0.0188	0.6638	0.0283218
	YOL161C	PAU20	0.0039	0.0985	0.0395939	0.0363	0.2907	0.124871
	YDR447C	RPS17B	0.004	0.0887	0.0450958	0.0114	0.1492	0.0764075
	YGR163W	GTR2	0.004	0.4889	0.00818163	0.0142	0.7073	0.0200763
	YJL012C	VTC4	0.004	0.3147	0.0127105	0.0156	1.3841	0.0112709
	YBR154C	RPB5	0.004	0.2876	0.0139082	0.0164	0.7182	0.0228349
	YDR392W	SPT3	0.004	0.4932	0.0081103	0.0222	3.9506	0.0056194
	YEL039C	CYC7	0.004	0.5277	0.00758006	0.0369	0.8417	0.0438398
	YLR303W	MET17	0.0041	0.3149	0.01302	0.0066	0.9485	0.00695836
	YJR048W	CYC1	0.0041	0.3207	0.0127845	0.0079	1.5007	0.00526421
	YDR054C	CDC34	0.0041	0.1847	0.0221982	0.012	0.7516	0.0159659
	YHR193C	EGD2	0.0041	0.1759	0.0233087	0.0181	0.6046	0.0299371
	YFL046W	FMP32	0.0041	0.5599	0.00732274	0.0271	3.5539	0.00762543
	YMR183C	SSO2	0.0041	0.3285	0.012481	0.0348	1.0201	0.0341143
	YIL111W	COX5B	0.0041	0.4953	0.00827781	0.085	2.0234	0.0420085
	YNL329C	PEX6	0.0041	0.0158	0.259494	0.1175	1.3191	0.0890759
	YNL189W	SRP1	0.0042	0.3036	0.013834	0.0091	0.7892	0.0115307
	YPR088C	SRP54	0.0042	0.3311	0.012685	0.0122	0.9427	0.0129416
	YER043C	SAH1	0.0042	0.2291	0.0183326	0.0157	0.3495	0.0449213
	YEL024W	RIP1	0.0042	0.275	0.0152727	0.0183	1.868	0.00979657
	YDR001C	NTH1	0.0042	0.3412	0.0123095	0.025	1.0629	0.0235206
	YNL069C	RPL16B	0.0042	0.1191	0.0352645	0.0363	0.2995	0.121202
	YJL034W	KAR2	0.0043	0.3356	0.0128129	0.0129	1.1523	0.011195
	YGR175C	ERG1	0.0043	0.2445	0.0175869	0.0149	0.6051	0.024624
	YPL093W	NOG1	0.0043	0.3084	0.0139429	0.0171	0.8693	0.019671
	YKL181W	PRS1	0.0043	0.331	0.0129909	0.0184	0.818	0.0224939
	YML121W	GTR1	0.0043	0.3898	0.0110313	0.019	1.1161	0.0170236
	YDL182W	LYS20	0.0043	0.4337	0.00991469	0.0224	1.2859	0.0174197
	YML069W	POB3	0.0043	0.2749	0.0156421	0.0247	1.1618	0.0212601
	YOL126C	MDH2	0.0043	0.4769	0.00901657	0.0288	2.2842	0.0126084
	YDR059C	UBC5	0.0044	0.3135	0.0140351	0	0.9207	0
	YDR177W	UBC1	0.0044	0.3222	0.0136561	0.0084	3.3271	0.00252472
	YHR026W	PPA1	0.0044	0.1198	0.0367279	0.0107	0.3691	0.0289894
	YDL135C	RDI1	0.0044	0.3485	0.0126255	0.0197	1.6905	0.0116534
	YNL222W	SSU72	0.0044	0.1058	0.0415879	0.0209	0.8647	0.0241702
	YDR079W	PET100	0.0044	0.201	0.0218905	0.024	1.0089	0.0237883
	YKR052C	MRS4	0.0044	0.3303	0.0133212	0.0267	0.9904	0.0269588
	YOL097C	WRS1	0.0044	0.2582	0.0170411	0.0317	0.7931	0.0399697
	YGR231C	PHB2	0.0044	0.4588	0.00959024	0.0462	0.7285	0.063418
	YLR359W	ADE13	0.0045	0.4973	0.00904886	0.0151	1.1066	0.0136454
	YGR218W	CRM1	0.0045	0.3347	0.0134449	0.0167	1.0047	0.0166219
	YBR038W	CHS2	0.0045	0.3546	0.0126904	0.0203	1.0891	0.0186392
	YPR041W	TIF5	0.0045	0.3003	0.014985	0.0277	0.6448	0.0429591
	YOL109W	ZEO1	0.0045	0.1698	0.0265018	0.129	0.5431	0.237525
	YDL160C	DHH1	0.0046	0.3625	0.0126897	0.0121	0.6901	0.0175337
	YBL072C	RPS8A	0.0046	0.0436	0.105505	0.0158	0.1997	0.0791187
	YHR068W	DYS1	0.0046	0.2664	0.0172673	0.0169	0.5241	0.0322458
	YKL190W	CNB1	0.0046	0.3862	0.0119109	0.0186	1.4716	0.0126393
	YBR218C	PYC2	0.0046	0.3408	0.0134977	0.0245	1.356	0.0180678
	YLR147C	SMD3	0.0046	0.3879	0.0118587	0.0338	1.1075	0.0305192
	YDL081C	RPP1A	0.0046	0.0966	0.047619	0.0424	0.2722	0.155768
	YGR060W	ERG25	0.0047	0.1288	0.0364907	0.0103	0.4516	0.0228078
	YCR012W	PGK1	0.0047	0.047	0.1	0.0169	0.14	0.120714
	YOR063W	RPL3	0.0047	0.0776	0.060567	0.0193	0.1995	0.0967419
	YKR068C	BET3	0.0047	0.3857	0.0121856	0.0252	1.1968	0.0210561
	YBR106W	PHO88	0.0047	0.2039	0.0230505	0.0432	2.2255	0.0194114
	YOL077C	BRX1	0.0048	0.2903	0.0165346	0.0132	1.0303	0.0128118
	YPL211W	NIP7	0.0048	0.2904	0.0165289	0.0156	0.98	0.0159184
	YPR183W	DPM1	0.0048	0.4276	0.0112254	0.0346	2.3601	0.0146604
	YBR117C	TKL2	0.0048	0.4465	0.0107503	0.0357	2.4308	0.0146865
	YLR351C	NIT3	0.0048	0.4134	0.011611	0.0371	1.7582	0.0211011
	YDR258C	HSP78	0.0048	0.447	0.0107383	0.0555	1.7411	0.0318764
	YDR092W	UBC13	0.0049	0.5062	0.00967997	0.005	0.9978	0.00501102
	YER081W	SER3	0.0049	0.3531	0.0138771	0.019	1.5986	0.0118854
	YGL008C	PMA1	0.0049	0.1152	0.0425347	0.0226	0.2415	0.0935818
	YHR025W	THR1	0.0049	0.3863	0.0126844	0.0243	0.8051	0.0301826
	YDR328C	SKP1	0.0049	0.2984	0.0164209	0.0281	0.5938	0.0473223
	YDL165W	CDC36	0.005	0.4078	0.0122609	0.0138	0.8855	0.0155844
	YDR190C	RVB1	0.005	0.3449	0.014497	0.0145	1.218	0.0119048
	YPL145C	KES1	0.005	0.2832	0.0176554	0.0228	1.1186	0.0203826
	YAL038W	CDC19	0.0051	0.0787	0.064803	0.0144	0.1465	0.0982935
	YPR010C	RPA135	0.0051	0.4055	0.0125771	0.0169	0.8622	0.019601
	YAL036C	RBG1	0.0051	0.3579	0.0142498	0.0197	1.0812	0.0182205
	YGL022W	STT3	0.0051	0.2685	0.0189944	0.0268	1.8561	0.0144389
	YLR229C	CDC42	0.0052	0.1345	0.0386617	0.005	0.6972	0.00717154
	YMR205C	PFK2	0.0052	0.2516	0.0206677	0.0142	0.569	0.0249561
	YEL011W	GLC3	0.0052	0.4323	0.0120287	0.0318	2.7587	0.0115272
	YLR017W	MEU1	0.0052	0.5049	0.0102991	0.0342	1.1242	0.0304216
	YHR019C	DED81	0.0052	0.2332	0.0222985	0.0452	0.8032	0.0562749
	YBR181C	RPS6B	0.0053	0.0729	0.0727023	0.0099	0.0833	0.118848
	YLR270W	DCS1	0.0053	0.3071	0.0172582	0.0109	0.8174	0.013335
	YDL181W	INH1	0.0053	0.2499	0.0212085	0.0158	1.1449	0.0138003
	YKL053C-A	MDM35	0.0053	0.322	0.0164596	0.0158	1.0364	0.0152451
	YDR091C	RLI1	0.0053	0.471	0.0112527	0.0167	0.7521	0.0222045
	YOL094C	RFC4	0.0053	0.435	0.0121839	0.0251	1.3285	0.0188935
	YLR249W	YEF3	0.0053	0.1629	0.0325353	0.0264	0.3043	0.0867565
	YKL148C	SDH1	0.0053	0.2688	0.0197173	0.027	0.9504	0.0284091
	YIL041W	GVP36	0.0053	0.5118	0.0103556	0.0307	1.1296	0.0271778
	YDR394W	RPT3	0.0054	0.2454	0.0220049	0.0088	0.569	0.0154657
	YGL011C	SCL1	0.0054	0.4138	0.0130498	0.0141	0.854	0.0165105
	YCL059C	KRR1	0.0054	0.2741	0.0197008	0.0176	1.3448	0.0130874
	YGR005C	TFG2	0.0054	0.4944	0.0109223	0.0259	1.235	0.0209717
	YOR374W	ALD4	0.0054	0.3195	0.0169014	0.0297	0.8608	0.0345028
	YDL066W	IDP1	0.0054	0.2862	0.0188679	0.0313	0.8487	0.0368799
	YLR244C	MAP1	0.0054	0.4285	0.0126021	0.0453	1.2118	0.0373824
	YBR058C-A	TSC3	0.0054	0.4872	0.0110837	0.0627	0.3805	0.164783
	YAL005C	SSA1	0.0055	0.1902	0.0289169	0.0193	0.373	0.0517426
	YNL255C	GIS2	0.0055	0.2662	0.0206612	0.0211	0.5675	0.0371806
	YDR335W	MSN5	0.0055	0.346	0.015896	0.0233	1.1147	0.0209025
	YOL061W	PRS5	0.0055	0.4486	0.0122604	0.0233	1.2974	0.017959
	YGR086C	PIL1	0.0055	0.257	0.0214008	0.0237	0.7546	0.0314074
	YOL143C	RIB4	0.0055	0.2033	0.0270536	0.0241	0.5664	0.0425494
	YFL045C	SEC53	0.0055	0.3549	0.0154973	0.0306	0.3856	0.0793568
	YDR062W	LCB2	0.0055	0.4581	0.0120061	0.0466	2.5952	0.0179562
	YJL143W	TIM17	0.0056	0.4304	0.0130112	0.0128	0.8062	0.015877
	YNL037C	IDH1	0.0056	0.3686	0.0151926	0.0186	1.094	0.0170018
	YKL182W	FAS1	0.0056	0.2617	0.0213985	0.023	0.7592	0.030295
	YER178W	PDA1	0.0056	0.2844	0.0196906	0.0236	1.1009	0.021437
	YEL034W	HYP2	0.0056	0.1074	0.0521415	0.0284	0.3542	0.0801807
	YJR010W	MET3	0.0056	0.2898	0.0193237	0.0307	1.2358	0.0248422
	YJR047C	ANB1	0.0056	0.1525	0.0367213	0.0375	0.3765	0.0996016
	YGR244C	LSC2	0.0056	0.3178	0.0176211	0.0416	0.9774	0.0425619
	YGL080W	FMP37	0.0056	0.4371	0.0128117	0.0508	0.8895	0.0571107
	YPR074C	TKL1	0.0057	0.2804	0.0203281	0.0166	0.5193	0.0319661
	YJL121C	RPE1	0.0057	0.2788	0.0204448	0.0282	1.0121	0.0278629
	YLR110C	CCW12	0.0057	0.079	0.0721519	0.0291	0.188	0.154787
	YLR370C	ARC18	0.0057	0.2675	0.0213084	0.0471	1.1885	0.0396298
	YGL120C	PRP43	0.0058	0.35	0.0165714	0.0175	2.4482	0.00714811
	YDR023W	SES1	0.0058	0.2866	0.0202373	0.0182	1.264	0.0143987
	YNR001C	CIT1	0.0058	0.3027	0.0191609	0.0206	0.8501	0.0242324
	YGL062W	PYC1	0.0058	0.4547	0.0127557	0.0206	1.5212	0.0135419
	YGL115W	SNF4	0.0058	0.3328	0.0174279	0.0249	0.7561	0.0329322
	YJR095W	SFC1	0.0058	0.2809	0.0206479	0.0276	1.16	0.0237931
	YCR047C	BUD23	0.0058	0.3536	0.0164027	0.0397	2.6437	0.0150168
	YNL147W	LSM7	0.0058	0.2776	0.0208934	0.0495	2.5475	0.0194308
	YKL113C	RAD27	0.0059	0.3756	0.0157082	0.0234	3.078	0.00760234
	YAL016W	TPD3	0.0059	0.3118	0.0189224	0.0291	0.819	0.0355311
	YFR015C	GSY1	0.0059	0.3723	0.0158474	0.0327	0.9586	0.0341122
	YKL004W	AUR1	0.0059	0.2558	0.0230649	0.0367	1.0105	0.0363187
	YKL160W	ELF1	0.0059	0.361	0.0163435	0.0435	1.1125	0.0391011
	YMR001C	CDC5	0.006	0.4372	0.0137237	0.0116	2.0232	0.00573349
	YML106W	URA5	0.006	0.2744	0.0218659	0.0147	0.5018	0.0292945
	YHL031C	GOS1	0.006	0.3763	0.0159447	0.0227	1.4674	0.0154695
	YCL055W	KAR4	0.006	0.3961	0.0151477	0.0238	1.0884	0.021867
	YPL122C	TFB2	0.006	0.296	0.0202703	0.0307	0.7488	0.0409989
	YFR044C	DUG1	0.006	0.3003	0.01998	0.035	0.9179	0.0381305
	YNL327W	EGT2	0.006	0.0108	0.555556	0.3588	1.1377	0.315373
	YLR258W	GSY2	0.0061	0.3086	0.0197667	0.0171	1.1955	0.0143036
	YGL026C	TRP5	0.0061	0.3402	0.0179306	0.0191	0.9211	0.0207361
	YCL009C	ILV6	0.0061	0.2362	0.0258256	0.0234	1.0112	0.0231408
	YLR089C	ALT1	0.0061	0.3373	0.0180848	0.0378	1.0595	0.0356772
	YPR036W	VMA13	0.0061	0.1969	0.0309802	0.0453	0.788	0.0574873
	YNL015W	PBI2	0.0061	0.2622	0.0232647	0.0554	0.5273	0.105064
	YOR065W	CYT1	0.0062	0.2258	0.0274579	0.01	1.0515	0.00951022
	YDR158W	HOM2	0.0062	0.4242	0.0146157	0.0187	1.1996	0.0155885
	YOR224C	RPB8	0.0062	0.3095	0.0200323	0.0209	1.7898	0.0116773
	YJL008C	CCT8	0.0062	0.3856	0.0160788	0.0226	0.8957	0.0252317
	YLR075W	RPL10	0.0062	0.0665	0.0932331	0.0247	0.1612	0.153226
	YDR450W	RPS18A	0.0062	0.0527	0.117647	0.0566	0.6591	0.0858747
	YLR325C	RPL38	0.0063	0.0414	0.152174	0.0063	0.0413	0.152542
	YJL140W	RPB4	0.0063	0.2452	0.0256933	0.0218	0.8722	0.0249943
	YNL220W	ADE12	0.0063	0.2658	0.023702	0.025	0.6617	0.0377815
	YKL117W	SBA1	0.0063	0.4928	0.0127841	0.0263	1.2041	0.021842
	YPR035W	GLN1	0.0063	0.2269	0.0277655	0.0347	0.5133	0.0676018
	YPR107C	YTH1	0.0064	0.4017	0.0159323	0.0087	1.0542	0.0082527
	YMR079W	SEC14	0.0064	0.1782	0.0359147	0.0157	0.6778	0.0231632
	YPL178W	CBC2	0.0064	0.4414	0.0144993	0.0236	0.9073	0.0260112
	YCL040W	GLK1	0.0064	0.4203	0.0152272	0.0249	4.368	0.00570055
	YOL123W	HRP1	0.0064	0.306	0.020915	0.0266	0.9805	0.027129
	YAL054C	ACS1	0.0064	0.3765	0.0169987	0.0266	1.5594	0.0170578
	YNR053C	NOG2	0.0064	0.3244	0.0197287	0.034	0.9892	0.0343712
	YER086W	ILV1	0.0065	0.2334	0.0278492	0.0247	0.7466	0.0330833
	YHR170W	NMD3	0.0065	0.2977	0.0218341	0.0288	0.9493	0.0303381
	YGL245W	GUS1	0.0066	0.3131	0.0210795	0.0289	0.6335	0.0456196
	YPL106C	SSE1	0.0066	0.4925	0.013401	0.0329	0.7727	0.042578
	YML058W-A	HUG1	0.0066	0.3056	0.0215969	0.0353	0.9308	0.0379244
	YLL041C	SDH2	0.0066	0.4354	0.0151585	0.0377	0.8313	0.0453507
	YDL095W	PMT1	0.0066	0.4172	0.0158198	0.0481	0.8048	0.0597664
	YAL012W	CYS3	0.0067	0.2273	0.0294765	0.0152	0.8148	0.0186549
	YBL092W	RPL32	0.0067	0.1053	0.0636277	0.0163	0.1971	0.0826991
	YLL018C	DPS1	0.0067	0.2479	0.027027	0.0194	1.4803	0.0131055
	YCL017C	NFS1	0.0067	0.4027	0.0166377	0.0194	1.2	0.0161667
	YER110C	KAP123	0.0067	0.3441	0.0194711	0.0207	0.7955	0.0260214
	YPR145W	ASN1	0.0067	0.2901	0.0230955	0.0343	0.7744	0.0442924
	YPL265W	DIP5	0.0067	0.2655	0.0252354	0.0425	1.0452	0.0406621
	YMR105C	PGM2	0.0067	0.314	0.0213376	0.0456	0.8801	0.0518123
	YLR029C	RPL15A	0.0068	0.0367	0.185286	0.0091	0.075	0.121333
	YER091C	MET6	0.0068	0.2543	0.0267401	0.0185	0.4569	0.0404903
	YOR116C	RPO31	0.0068	0.3621	0.0187793	0.028	1.3588	0.0206064
	YGR132C	PHB1	0.0068	0.3911	0.0173869	0.0299	1.3369	0.0223652
	YGR180C	RNR4	0.0068	0.1999	0.034017	0.0534	0.7639	0.0699044
	YLR175W	CBF5	0.0069	0.185	0.0372973	0.0069	0.5765	0.0119688
	YLR268W	SEC22	0.0069	0.257	0.0268482	0.0185	0.981	0.0188583
	YDR345C	HXT3	0.0069	0.3333	0.0207021	0.0213	0.5137	0.0414639
	YBR034C	HMT1	0.0069	0.3236	0.0213226	0.0218	0.8818	0.0247222
	YOR335C	ALA1	0.0069	0.3967	0.0173935	0.0224	0.8	0.028
	YPR156C	TPO3	0.0069	0.559	0.0123435	0.0225	1.4034	0.0160325
	YML126C	ERG13	0.0069	0.1662	0.0415162	0.0237	0.6432	0.036847
	YBL023C	MCM2	0.0069	0.5549	0.0124347	0.0243	1.3417	0.0181114
	YKL085W	MDH1	0.0069	0.3814	0.0180912	0.0284	1.2982	0.0218764
	YDR071C	PAA1	0.0069	0.3602	0.019156	0.0384	0.9611	0.0399542
	YOL077W-A	ATP19	0.0069	0.2907	0.0237358	0.0472	0.7507	0.0628747
	YBR296C	PHO89	0.0069	0.4227	0.0163236	0.0559	1.5002	0.0372617
	YJR019C	TES1	0.0069	0.3138	0.0219885	0.0636	1.5181	0.0418945
	YDR033W	MRH1	0.0069	0.1769	0.0390051	0.0909	0.5791	0.156968
	YNL322C	KRE1	0.0069	0.0268	0.257463	0.1525	0.7246	0.210461
	YKL046C	DCW1	0.007	0.3703	0.0189036	0.0163	2.7862	0.00585026
	YGL200C	EMP24	0.007	0.3186	0.0219711	0.0196	1.0067	0.0194696
	YLR197W	SIK1	0.007	0.2181	0.0320954	0.0209	0.8132	0.0257009
	YOR039W	CKB2	0.007	0.3918	0.0178663	0.0231	0.6879	0.0335805
	YBR249C	ARO4	0.007	0.2741	0.0255381	0.0232	0.8252	0.0281144
	YGR172C	YIP1	0.007	0.3843	0.0182149	0.0254	1.3673	0.0185768
	YGL167C	PMR1	0.007	0.4611	0.0151811	0.038	1.0601	0.0358457
	YBR029C	CDS1	0.007	0.3102	0.0225661	0.0408	0.9584	0.042571
	YOR109W	INP53	0.007	0.4303	0.0162677	0.0659	1.7037	0.0386805
	YNL090W	RHO2	0.0071	0.5175	0.0137198	0.0199	0.8177	0.0243366
	YPR160W	GPH1	0.0071	0.3561	0.0199382	0.0214	1.0038	0.021319
	YMR297W	PRC1	0.0071	0.3684	0.0192725	0.0283	1.12	0.0252679
	YMR015C	ERG5	0.0071	0.2379	0.0298445	0.0305	0.8907	0.0342427
	YDR002W	YRB1	0.0071	0.1796	0.0395323	1.0434	2.1056	0.495536
	YMR203W	TOM40	0.0072	0.2116	0.0340265	0.0099	0.656	0.0150915
	YJR070C	LIA1	0.0072	0.2546	0.0282797	0.0125	0.507	0.0246548
	YGR082W	TOM20	0.0072	0.3321	0.0216802	0.0152	0.7778	0.0195423
	YJL111W	CCT7	0.0072	0.4018	0.0179194	0.0186	1.0706	0.0173734
	YKL120W	OAC1	0.0072	0.2405	0.0299376	0.031	0.8135	0.0381069
	YGL207W	SPT16	0.0072	0.5079	0.014176	0.0312	1.376	0.0226744
	YPR173C	VPS4	0.0073	0.376	0.0194149	0.0188	1.0096	0.0186212
	YNL142W	MEP2	0.0073	0.3844	0.0189906	0.0201	1.2685	0.0158455
	YBL064C	PRX1	0.0073	0.4602	0.0158627	0.0279	1.3864	0.0201241
	YOR270C	VPH1	0.0073	0.3241	0.0225239	0.0316	0.7678	0.0411566
	YHR007C	ERG11	0.0073	0.2699	0.0270471	0.033	0.932	0.0354077
	YHR190W	ERG9	0.0073	0.3764	0.0193943	0.035	0.5805	0.0602929
	YMR272C	SCS7	0.0073	0.32	0.0228125	0.0403	1.1619	0.0346846
	YPL051W	ARL3	0.0074	0.3512	0.0210706	0.0147	0.6452	0.0227836
	YGR028W	MSP1	0.0074	0.453	0.0163355	0.0263	2.3433	0.0112235
	YCR053W	THR4	0.0074	0.3279	0.0225679	0.0285	0.8871	0.0321272
	YER095W	RAD51	0.0074	0.3029	0.0244305	0.0382	1.5036	0.0254057
	YGR088W	CTT1	0.0074	0.4153	0.0178184	0.0402	1.1095	0.0362325
	YGL147C	RPL9A	0.0074	0.1392	0.0531609	0.0448	0.2311	0.193855
	YDL205C	HEM3	0.0075	0.3516	0.0213311	0.0232	1.1442	0.0202762
	YML120C	NDI1	0.0075	0.3446	0.0217644	0.0276	1.485	0.0185859
	YNL025C	SSN8	0.0075	0.3636	0.0206271	0.0303	1.0481	0.0289095
	YJL133W	MRS3	0.0075	0.2344	0.0319966	0.0361	0.7375	0.0489492
	YNR032C-A	HUB1	0.0075	0.2963	0.0253122	0.0402	0.7625	0.0527213
	YHR104W	GRE3	0.0075	0.3539	0.0211924	0.0493	1.0354	0.0476144
	YIL008W	URM1	0.0075	0.2049	0.0366032	0.0643	1.3982	0.0459877
	YDL215C	GDH2	0.0076	0.4163	0.0182561	0.0259	1.6014	0.0161733
	YDL100C	GET3	0.0076	0.3155	0.0240887	0.0294	2.1816	0.0134763
	YKR002W	PAP1	0.0077	0.4108	0.0187439	0.0219	1.6697	0.0131161
	YGL040C	HEM2	0.0077	0.475	0.0162105	0.0318	1.3556	0.0234582
	YLR134W	PDC5	0.0077	0.1459	0.0527759	0.0366	0.3247	0.112719
	YLL045C	RPL8B	0.0078	0.1334	0.0584708	0.0163	0.1941	0.0839773
	YIL094C	LYS12	0.0078	0.3822	0.0204082	0.0255	1.7023	0.0149797
	YBR025C	OLA1	0.0078	0.214	0.0364486	0.0465	0.7867	0.0591077
	YKR014C	YPT52	0.0078	0.2867	0.0272061	0.0467	1.2735	0.0366706
	YPR113W	PIS1	0.0078	0.5046	0.0154578	0.0641	2.076	0.0308767
	YKR001C	VPS1	0.0079	0.2813	0.0280839	0.0192	0.8178	0.0234776
	YNL229C	URE2	0.0079	0.3466	0.0227928	0.0194	1.1695	0.0165883
	YDL171C	GLT1	0.0079	0.3784	0.0208774	0.0199	0.9872	0.020158
	YJR076C	CDC11	0.0079	0.2714	0.0291083	0.0315	0.809	0.038937
	YOL067C	RTG1	0.0079	0.4632	0.0170553	0.0427	1.2057	0.0354151
	YML081C-A	ATP18	0.008	0.3808	0.0210084	0.0079	0.5732	0.0137823
	YLR208W	SEC13	0.008	0.35	0.0228571	0.0095	0.7272	0.0130638
	YDR373W	FRQ1	0.008	0.4657	0.0171784	0.0199	1.5488	0.0128487
	YBR221C	PDB1	0.008	0.2476	0.0323102	0.0214	0.7556	0.0283219
	YGR284C	ERV29	0.008	0.2036	0.0392927	0.0226	0.6283	0.0359701
	YOL059W	GPD2	0.008	0.1762	0.045403	0.0427	0.7204	0.0592726
	YER048C	CAJ1	0.008	0.3429	0.0233304	0.0511	1.6633	0.0307221
	YPL028W	ERG10	0.0081	0.3362	0.0240928	0.0217	0.799	0.0271589
	YPL262W	FUM1	0.0081	0.554	0.0146209	0.022	1.0586	0.0207822
	YJL130C	URA2	0.0081	0.3214	0.0252022	0.0235	1.116	0.0210573
	YIL109C	SEC24	0.0081	0.3092	0.0261966	0.0269	1.0025	0.0268329
	YIL033C	BCY1	0.0081	0.2772	0.0292208	0.0351	1.236	0.0283981
	YGR038W	ORM1	0.0081	0.3977	0.0203671	0.0454	0.9995	0.0454227
	YOR197W	MCA1	0.0081	0.4768	0.0169883	0.0527	1.6037	0.0328615
	YDL235C	YPD1	0.0081	0.31	0.026129	0.0658	0.5863	0.112229
	YLR028C	ADE16	0.0082	0.3548	0.0231116	0.0173	1.0662	0.0162258
	YJR072C	NPA3	0.0082	0.2959	0.0277121	0.0263	1.2626	0.02083
	YIL125W	KGD1	0.0082	0.4338	0.0189027	0.0277	1.7611	0.0157288
	YLR060W	FRS1	0.0082	0.2591	0.031648	0.0282	1.0178	0.0277068
	YGR020C	VMA7	0.0082	0.2521	0.0325268	0.0356	0.4109	0.0866391
	YGR124W	ASN2	0.0082	0.2398	0.0341952	0.0365	0.8523	0.0428253
	YLR004C	THI73	0.0082	0.2231	0.0367548	0.0392	0.8204	0.0477816
	YHR128W	FUR1	0.0083	0.2817	0.029464	0.0232	0.9373	0.0247519
	YBR192W	RIM2	0.0083	0.4226	0.0196403	0.0317	1.0621	0.0298465
	YIR028W	DAL4	0.0083	0.2982	0.0278337	0.0456	0.9363	0.0487023
	YJR077C	MIR1	0.0084	0.2438	0.0344545	0.0171	0.91	0.0187912
	YOL039W	RPP2A	0.0084	0.1275	0.0658824	0.0195	0.1632	0.119485
	YMR308C	PSE1	0.0084	0.3664	0.0229258	0.0216	0.9247	0.0233589
	YLR291C	GCD7	0.0085	0.3377	0.0251703	0.0161	1.1894	0.0135362
	YER099C	PRS2	0.0085	0.4878	0.0174252	0.0221	1.2752	0.0173306
	YFL034C-B	MOB2	0.0085	0.3447	0.0246591	0.0244	1.0252	0.0238002
	YGL206C	CHC1	0.0085	0.388	0.0219072	0.0246	1.053	0.0233618
	YER065C	ICL1	0.0085	0.3587	0.0236967	0.0287	1.5256	0.0188123
	YGL112C	TAF6	0.0085	0.4746	0.0179098	0.0292	1.2974	0.0225066
	YHL016C	DUR3	0.0085	0.4546	0.0186978	0.0513	1.0866	0.0472115
	YCR002C	CDC10	0.0086	0.3046	0.0282337	0.0165	1.5718	0.0104975
	YGL091C	NBP35	0.0086	0.3046	0.0282337	0.0212	1.7274	0.0122728
	YJR139C	HOM6	0.0086	0.3143	0.0273624	0.0236	0.9338	0.0252731
	YGR204W	ADE3	0.0086	0.3492	0.0246277	0.0255	1.3067	0.0195148
	YER070W	RNR1	0.0086	0.3429	0.0250802	0.027	0.8447	0.031964
	YBR121C	GRS1	0.0086	0.3529	0.0243695	0.0291	1.0782	0.0269894
	YLR328W	NMA1	0.0086	0.4454	0.0193085	0.031	1.1446	0.0270837
	YIL155C	GUT2	0.0086	0.3819	0.022519	0.0345	1.5723	0.0219424
	YPL231W	FAS2	0.0086	0.3509	0.0245084	0.0364	0.8616	0.042247
	YPR138C	MEP3	0.0086	0.3919	0.0219444	0.0895	1.0668	0.0838958
	YGL191W	COX13	0.0087	0.5106	0.0170388	0.0132	0.8995	0.0146748
	YOR341W	RPA190	0.0087	0.3259	0.0266953	0.0163	1.3542	0.0120366
	YML077W	BET5	0.0087	0.3403	0.0255657	0.0171	1.2177	0.0140429
	YPR069C	SPE3	0.0087	0.4219	0.020621	0.0181	1.3678	0.0132329
	YHR183W	GND1	0.0087	0.0979	0.0888662	0.0189	0.6101	0.0309785
	YNL317W	PFS2	0.0087	0.445	0.0195506	0.0237	2.1382	0.0110841
	YDR399W	HPT1	0.0087	0.3255	0.0267281	0.0263	0.7753	0.0339224
	YIL066C	RNR3	0.0087	0.4387	0.0198313	0.033	0.9862	0.0334618
	YDR486C	VPS60	0.0087	0.3266	0.0266381	0.0438	0.7924	0.0552751
	YPL061W	ALD6	0.0088	0.2485	0.0354125	0.0115	0.7183	0.01601
	YKR080W	MTD1	0.0088	0.2906	0.0302822	0.0247	1.0479	0.023571
	YKL203C	TOR2	0.0088	0.4151	0.0211997	0.0317	1.6306	0.0194407
	YGL009C	LEU1	0.0088	0.3636	0.0242024	0.0387	1.0026	0.0385996
	YPR020W	ATP20	0.0088	0.2199	0.0400182	0.0571	0.5973	0.0955969
	YJR109C	CPA2	0.0089	0.3384	0.0263002	0.0283	1.3182	0.0214687
	YGL194C	HOS2	0.0089	0.3113	0.0285898	0.0429	2.3834	0.0179995
	YLR411W	CTR3	0.0089	0.5442	0.0163543	0.0455	1.3766	0.0330524
	YBL039C	URA7	0.009	0.3416	0.0263466	0.0283	0.893	0.0316909
	YFL018C	LPD1	0.009	0.456	0.0197368	0.0284	0.7824	0.0362986
	YNL061W	NOP2	0.009	0.374	0.0240642	0.0296	1.1547	0.0256344
	YKL029C	MAE1	0.009	0.2914	0.0308854	0.0304	2.6147	0.0116266
	YDL045W-A	MRP10	0.009	0.7708	0.0116762	0.0306	0.9943	0.0307754
	YLR432W	IMD3	0.009	0.3538	0.0254381	0.0315	0.8178	0.038518
	YGL234W	ADE5,7	0.009	0.2609	0.034496	0.0323	0.872	0.0370413
	YBR236C	ABD1	0.009	0.4916	0.0183076	0.0697	1.1636	0.0599003
	YNL241C	ZWF1	0.0091	0.3556	0.0255906	0.0185	1.2411	0.0149061
	YKL126W	YPK1	0.0091	0.3379	0.026931	0.0216	1.1207	0.0192737
	YMR290C	HAS1	0.0091	0.3365	0.0270431	0.0289	0.9718	0.0297386
	YOL062C	APM4	0.0091	0.4131	0.0220286	0.0525	1.1548	0.0454624
	YGR260W	TNA1	0.0091	0.3061	0.0297288	0.0596	0.9487	0.0628228
	YER023W	PRO3	0.0092	0.2286	0.040245	0.0274	0.9017	0.030387
	YOL058W	ARG1	0.0092	0.3498	0.0263007	0.0315	0.7409	0.0425159
	YKL217W	JEN1	0.0092	0.403	0.0228288	0.0528	1.1159	0.0473161
	YMR055C	BUB2	0.0093	0.4375	0.0212571	0.0231	1.1766	0.0196328
	YPL237W	SUI3	0.0093	0.153	0.0607843	0.0235	0.6091	0.0385815
	YGR092W	DBF2	0.0093	0.4218	0.0220484	0.0247	1.1881	0.0207895
	YHR200W	RPN10	0.0093	0.316	0.0294304	0.03	0.9913	0.0302633
	YLR292C	SEC72	0.0093	0.4286	0.0216986	0.0413	1.1695	0.0353142
	YNR002C	ATO2	0.0093	0.6177	0.0150559	0.0454	1.1333	0.04006
	YOR370C	MRS6	0.0094	0.3644	0.0257958	0.0193	1.2117	0.015928
	YMR080C	NAM7	0.0094	0.3334	0.0281944	0.0212	1.5122	0.0140193
	YER012W	PRE1	0.0094	0.3199	0.0293842	0.0262	0.7878	0.0332572
	YAL053W	FLC2	0.0094	0.3912	0.0240286	0.0476	1.1941	0.0398627
	YNL113W	RPC19	0.0094	0.3772	0.0249205	0.0569	1.1586	0.049111
	YOR362C	PRE10	0.0095	0.4382	0.0216796	0.027	1.0241	0.0263646
	YLR340W	RPP0	0.0095	0.1106	0.0858951	0.0369	0.2745	0.134426
	YER044C	ERG28	0.0095	0.2169	0.043799	0.0385	0.3579	0.107572
	YPL078C	ATP4	0.0095	0.3319	0.0286231	0.0587	0.9777	0.0600389
	YPR060C	ARO7	0.0095	0.3105	0.0305958	0.0611	0.9392	0.0650554
	YGR174C	CBP4	0.0095	0.4343	0.0218743	0.0709	1.0072	0.0703932
	YDL217C	TIM22	0.0096	0.7411	0.0129537	0.0184	1.3528	0.0136014
	YIL002C	INP51	0.0096	0.3278	0.0292862	0.0272	0.9618	0.0282803
	YEL031W	SPF1	0.0096	0.2735	0.0351005	0.0307	1.1364	0.0270151
	YAR015W	ADE1	0.0096	0.1801	0.0533037	0.0311	0.9349	0.0332656
	YPL047W	SGF11	0.0096	0.2801	0.0342735	0.0365	0.9538	0.038268
	YKR042W	UTH1	0.0096	0.2775	0.0345946	0.0513	0.7385	0.0694651
	YBR036C	CSG2	0.0096	0.3078	0.0311891	0.0646	0.8579	0.0753002
	YDL102W	POL3	0.0097	0.4472	0.0216905	0.0155	1.1205	0.0138331
	YKR062W	TFA2	0.0097	0.4502	0.021546	0.0225	1.0801	0.0208314
	YJL052W	TDH1	0.0097	0.1412	0.0686969	0.0231	0.294	0.0785714
	YNL104C	LEU4	0.0097	0.3235	0.0299845	0.0232	1.3872	0.0167243
	YNL287W	SEC21	0.0097	0.2792	0.0347421	0.0278	1.0515	0.0264384
	YOR108W	LEU9	0.0097	0.3798	0.0255398	0.0301	1.1006	0.0273487
	YPL160W	CDC60	0.0097	0.2748	0.0352984	0.0323	1.9954	0.0161872
	YIL051C	MMF1	0.0097	0.3307	0.0293317	0.0368	0.4753	0.0774248
	YAL023C	PMT2	0.0097	0.2374	0.0408593	0.0493	0.8149	0.0604982
	YDL130W-A	STF1	0.0097	0.628	0.0154459	0.0918	0.7874	0.116586
	YLL001W	DNM1	0.0098	0.3027	0.0323753	0.0198	0.7322	0.0270418
	YOL040C	RPS15	0.0098	0.0814	0.120393	0.0223	0.1104	0.201993
	YIL118W	RHO3	0.0098	0.2848	0.0344101	0.0236	1.1541	0.0204488
	YLR304C	ACO1	0.0099	0.3054	0.0324165	0.0201	0.7864	0.0255595
	YLR438W	CAR2	0.0099	0.3734	0.0265131	0.0227	1.3064	0.017376
	YGR116W	SPT6	0.0099	0.3329	0.0297387	0.0252	1.2349	0.0204065
	YGR032W	GSC2	0.0099	0.3899	0.0253911	0.0302	1.9975	0.0151189
	YNR043W	MVD1	0.0099	0.3283	0.0301553	0.0345	0.954	0.0361635
	YMR108W	ILV2	0.0099	0.3245	0.0305085	0.035	0.8062	0.0434135
	YMR161W	HLJ1	0.0099	0.4066	0.0243483	0.0353	0.7222	0.0488784
	YNR055C	HOL1	0.0099	0.3898	0.0253976	0.0366	1.0239	0.0357457
	YDR353W	TRR1	0.0099	0.292	0.0339041	0.0397	0.8538	0.046498
	YHL003C	LAG1	0.0099	0.3416	0.0289813	0.0489	1.4139	0.0345852
	YKR049C	FMP46	0.0099	0.4438	0.0223073	0.1269	1.3819	0.0918301
	YCR072C	RSA4	0.01	0.35	0.0285714	0.0197	2.4097	0.00817529
	YNL307C	MCK1	0.01	0.2624	0.0381098	0.0211	0.9109	0.0231639
	YKL216W	URA1	0.01	0.3494	0.0286205	0.0217	1.3877	0.0156374
	YDL132W	CDC53	0.01	0.3582	0.0279174	0.0339	0.9011	0.0376207
	YMR058W	FET3	0.01	0.4654	0.0214869	0.0486	1.2057	0.0403085
	YHR074W	QNS1	0.0101	0.3191	0.0316515	0.02	2.0354	0.00982608
	YIL090W	ICE2	0.0101	0.2567	0.0393455	0.0232	0.9318	0.024898
	YPL259C	APM1	0.0101	0.2909	0.0347198	0.0277	0.9119	0.0303761
	YIR034C	LYS1	0.0101	0.3422	0.0295149	0.0295	0.7744	0.038094
	YNL016W	PUB1	0.0101	0.3102	0.0325596	0.0301	0.6176	0.048737
	YKR081C	RPF2	0.0101	0.2554	0.0395458	0.0426	0.7121	0.0598231
	YJR025C	BNA1	0.0101	0.3867	0.0261184	0.0429	1.0171	0.0421787
	YER103W	SSA4	0.0102	0.4117	0.0247753	0.0233	2.4084	0.00967447
	YIL048W	NEO1	0.0102	0.3438	0.0296684	0.0298	1.2043	0.0247447
	YLR109W	AHP1	0.0102	0.3024	0.0337302	0.0303	0.6543	0.046309
	YNR050C	LYS9	0.0102	0.3838	0.0265763	0.0328	0.6689	0.0490357
	YIL068C	SEC6	0.0102	0.2994	0.0340681	0.0365	0.7426	0.0491516
	YMR011W	HXT2	0.0102	0.2703	0.0377358	0.0372	0.9093	0.0409106
	YOR198C	BFR1	0.0102	0.242	0.0421488	0.0426	0.6797	0.0626747
	YLL043W	FPS1	0.0102	0.4016	0.0253984	0.0445	1.4019	0.0317426
	YDL134C	PPH21	0.0102	0.4658	0.0218978	0.0506	1.1607	0.0435944
	YLR397C	AFG2	0.0102	0.4425	0.0230508	0.0592	2.3131	0.0255934
	YLR113W	HOG1	0.0103	0.2898	0.0355418	0.0205	0.8795	0.0233087
	YLL011W	SOF1	0.0103	0.3065	0.0336052	0.0238	1.055	0.0225592
	YBR011C	IPP1	0.0103	0.1092	0.0943223	0.0324	0.4052	0.0799605
	YHR169W	DBP8	0.0103	0.3428	0.0300467	0.0384	0.8826	0.0435078
	YJR133W	XPT1	0.0103	0.5826	0.0176794	0.0572	1.2251	0.0466901
	YBL030C	PET9	0.0104	0.1687	0.0616479	0.0314	0.4038	0.0777613
	YFR050C	PRE4	0.0104	0.4248	0.0244821	0.0341	0.6984	0.0488259
	YLR363C	NMD4	0.0104	0.5031	0.0206718	0.0344	0.7973	0.0431456
	YEL046C	GLY1	0.0104	0.3404	0.0305523	0.0478	1.4846	0.0321972
	YMR093W	UTP15	0.0105	0.3421	0.0306928	0.0218	1.1785	0.0184981
	YEL036C	ANP1	0.0105	0.3728	0.0281652	0.0287	1.6776	0.0171078
	YOL129W	VPS68	0.0105	0.2956	0.035521	0.0345	1.3637	0.0252988
	YKL164C	PIR1	0.0105	0.5248	0.0200076	0.0362	1.2482	0.0290018
	YNL154C	YCK2	0.0105	0.3343	0.0314089	0.0396	1.0646	0.0371971
	YCR098C	GIT1	0.0105	0.3493	0.0300601	0.056	0.7504	0.0746269
	YMR197C	VTI1	0.0106	0.36	0.0294444	0.0311	1.2122	0.0256558
	YMR010W		0.0106	0.352	0.0301136	0.0401	0.9014	0.0444864
	YCL025C	AGP1	0.0106	0.2785	0.038061	0.0448	1.9054	0.0235121
	YNL191W	DUG3	0.0107	0.3017	0.0354657	0.0288	1.0176	0.0283019
	YDR226W	ADK1	0.0107	0.2955	0.0362098	0.0295	0.6246	0.0472302
	YGR055W	MUP1	0.0107	0.3462	0.030907	0.0336	0.8153	0.0412118
	YNR017W	TIM23	0.0107	0.3273	0.0326917	0.0617	1.8049	0.0341847
	YLR274W	MCM5	0.0108	0.4176	0.0258621	0.0041	1.213	0.00338005
	YBL075C	SSA3	0.0108	0.5181	0.0208454	0.0225	1.2023	0.0187141
	YOR128C	ADE2	0.0108	0.3947	0.0273626	0.0301	1.306	0.0230475
	YKR038C	KAE1	0.0108	0.3999	0.0270068	0.0398	2.5986	0.0153159
	YHR121W	LSM12	0.0108	0.2225	0.0485393	0.0444	0.615	0.0721951
	YLL055W	YCT1	0.0108	0.3808	0.0283613	0.0636	1.2943	0.0491385
	YNL001W	DOM34	0.0108	0.3553	0.0303968	0.0761	1.603	0.0474735
	YIL143C	SSL2	0.0109	0.3902	0.0279344	0.025	1.5612	0.0160133
	YPL203W	TPK2	0.0109	0.2691	0.0405054	0.0254	1.0032	0.025319
	YDL017W	CDC7	0.0109	0.4861	0.0224234	0.0294	1.7584	0.0167197
	YLL028W	TPO1	0.0109	0.335	0.0325373	0.0477	0.9422	0.0506262
	YIL004C	BET1	0.0109	0.4121	0.0264499	0.0538	1.0342	0.0520209
	YDL128W	VCX1	0.0109	0.338	0.0322485	0.0572	1.1865	0.048209
	YOR157C	PUP1	0.011	0.2401	0.0458142	0.0287	1.0113	0.0283793
	YNL064C	YDJ1	0.011	0.2862	0.0384347	0.0293	0.5634	0.0520057
	YDR256C	CTA1	0.011	0.2926	0.037594	0.0322	1.2427	0.0259113
	YKL096W-A	CWP2	0.011	0.1819	0.0604728	0.04	0.3124	0.128041
	YIL105C	SLM1	0.011	0.3287	0.0334652	0.0414	1.2564	0.0329513
	YHR096C	HXT5	0.011	0.3407	0.0322865	0.0455	1.2852	0.0354031
	YBR061C	TRM7	0.011	0.5295	0.0207743	0.0509	1.7187	0.0296154
	YNL288W	CAF40	0.011	0.3054	0.0360183	0.0551	0.7707	0.0714934
	YFR052W	RPN12	0.011	0.2818	0.0390348	0.0646	0.9822	0.0657707
	YDR105C	TMS1	0.0111	0.4377	0.0253598	0.0193	1.0232	0.0188624
	YNR003C	RPC34	0.0111	0.2635	0.0421252	0.0254	1.0833	0.0234469
	YPR103W	PRE2	0.0111	0.3854	0.0288012	0.0262	0.6255	0.0418865
	YAR007C	RFA1	0.0111	0.2919	0.0380267	0.0272	0.8334	0.0326374
	YNL117W	MLS1	0.0111	0.3865	0.0287193	0.0283	1.1023	0.0256736
	YMR158W	MRPS8	0.0111	0.4088	0.0271526	0.032	2.502	0.0127898
	YBR222C	PCS60	0.0111	0.4136	0.0268375	0.0383	1.432	0.0267458
	YBR021W	FUR4	0.0111	0.2772	0.0400433	0.0384	0.8955	0.0428811
	YPR110C	RPC40	0.0112	0.3268	0.0342717	0.0289	0.9824	0.0294178
	YBR023C	CHS3	0.0112	0.3652	0.0306681	0.0338	1.1515	0.029353
	YDR477W	SNF1	0.0112	0.2887	0.0387946	0.0339	1.2282	0.0276014
	YGL225W	VRG4	0.0112	0.2566	0.0436477	0.0419	0.5347	0.0783617
	YGR065C	VHT1	0.0112	0.4003	0.027979	0.044	1.229	0.0358015
	YCR004C	YCP4	0.0112	0.3713	0.0301643	0.0477	0.9	0.053
	YAR071W	PHO11	0.0112	0.1595	0.0702194	0.0512	0.3204	0.1598
	YBR002C	RER2	0.0113	0.2678	0.0421957	0.042	1.0958	0.0383282
	YNR031C	SSK2	0.0113	0.4728	0.0239002	0.0435	2.7536	0.0157975
	YHR205W	SCH9	0.0113	0.2883	0.0391953	0.0441	1.2276	0.0359238
	YER087C-B	SBH1	0.0113	0.2188	0.0516453	0.0447	0.4677	0.0955741
	YGL184C	STR3	0.0113	0.36	0.0313889	0.0551	1.3573	0.0405953
	YOR230W	WTM1	0.0113	0.3671	0.0307818	0.0557	1.0357	0.0537801
	YGR253C	PUP2	0.0114	0.3317	0.0343684	0.0081	1.1782	0.00687489
	YOL010W	RCL1	0.0114	0.3097	0.0368098	0.0242	0.7727	0.0313188
	YOR043W	WHI2	0.0114	0.3377	0.0337578	0.0535	0.9233	0.0579443
	YHR203C	RPS4B	0.0115	0.1103	0.104261	0.0148	0.2391	0.0618988
	YNR052C	POP2	0.0115	0.2343	0.0490824	0.0227	1.063	0.0213547
	YDL201W	TRM8	0.0115	0.3175	0.0362205	0.0295	0.8182	0.0360548
	YKL210W	UBA1	0.0115	0.3543	0.0324584	0.0327	1.3593	0.0240565
	YJL173C	RFA3	0.0115	0.3868	0.0297311	0.0443	0.9922	0.0446483
	YGR272C		0.0115	0.3653	0.031481	0.0446	1.1041	0.0403949
	YBR104W	YMC2	0.0115	0.321	0.0358255	0.0448	0.8251	0.0542964
	YDR058C	TGL2	0.0115	0.4394	0.0261721	0.0711	2.0558	0.0345851
	YLR081W	GAL2	0.0115	0.3403	0.0337937	0.0963	1.6877	0.0570599
	YOR142W	LSC1	0.0116	0.4484	0.0258698	0.0298	1.0336	0.0288313
	YER090W	TRP2	0.0116	0.4881	0.0237656	0.0328	2.1871	0.014997
	YJR135W-A	TIM8	0.0116	0.2454	0.0472698	0.0387	0.6627	0.0583975
	YNL161W	CBK1	0.0116	0.4652	0.0249355	0.0393	2.6409	0.0148813
	YDR013W	PSF1	0.0116	0.3064	0.037859	0.0414	1.031	0.0401552
	YAL062W	GDH3	0.0116	0.3871	0.0299664	0.0446	1.2845	0.0347217
	YBR078W	ECM33	0.0116	0.2483	0.0467177	0.0874	0.9435	0.0926338
	YOR357C	SNX3	0.0117	0.1751	0.066819	0.0086	1.2462	0.00690098
	YLR005W	SSL1	0.0117	0.4523	0.0258678	0.0167	1.6169	0.0103284
	YKR093W	PTR2	0.0117	0.3172	0.0368852	0.0242	1.6844	0.0143671
	YLR275W	SMD2	0.0117	0.2879	0.0406391	0.0254	2.2137	0.011474
	YDR086C	SSS1	0.0117	0.1463	0.0799727	0.036	0.8231	0.0437371
	YPL273W	SAM4	0.0117	0.4265	0.0274326	0.054	0.8962	0.0602544
	YIR022W	SEC11	0.0118	0.2909	0.0405638	0.0182	1.4924	0.0121951
	YIL074C	SER33	0.0118	0.7106	0.0166057	0.0244	1.094	0.0223035
	YEL032W	MCM3	0.0118	0.377	0.0312997	0.0317	1.2031	0.0263486
	YPL196W	OXR1	0.0118	0.3673	0.0321263	0.0351	2.0262	0.0173231
	YKL163W	PIR3	0.0118	0.4133	0.0285507	0.0362	1.1315	0.0319929
	YBR006W	UGA2	0.0118	0.4014	0.0293971	0.0386	1.3847	0.0278761
	YPR168W	NUT2	0.0118	0.3602	0.0327596	0.0414	1.1385	0.0363636
	YGL044C	RNA15	0.0118	0.2149	0.0549093	0.051	1.3602	0.0374945
	YDR382W	RPP2B	0.0119	0.0553	0.21519	0.0158	0.0918	0.172113
	YML078W	CPR3	0.0119	0.505	0.0235644	0.0159	0.7135	0.0222845
	YOR375C	GDH1	0.0119	0.22	0.0540909	0.0249	0.5178	0.0480881
	YKL009W	MRT4	0.0119	0.2283	0.0521244	0.0327	0.6099	0.0536153
	YDL145C	COP1	0.0119	0.3424	0.0347547	0.0343	1.2044	0.0284789
	YBL076C	ILS1	0.0119	0.2773	0.0429138	0.0349	0.984	0.0354675
	YJL060W	BNA3	0.0119	0.51	0.0233333	0.0383	1.8102	0.0211579
	YPR056W	TFB4	0.0119	0.4065	0.0292743	0.0412	1.2717	0.0323976
	YJL082W	IML2	0.0119	0.474	0.0251055	0.0489	2.6346	0.0185607
	YKL189W	HYM1	0.012	0.3654	0.0328407	0.0301	1.1022	0.027309
	YPL050C	MNN9	0.012	0.3151	0.0380831	0.0321	0.9928	0.0323328
	YBR251W	MRPS5	0.012	0.4292	0.027959	0.0383	1.0442	0.0366788
	YDL080C	THI3	0.012	0.3842	0.0312337	0.0399	1.1913	0.0334928
	YNL183C	NPR1	0.012	0.4014	0.0298954	0.0506	2.1199	0.0238691
	YCL026C-B	HBN1	0.012	0.3837	0.0312744	0.0603	1.0257	0.0587891
	YPL010W	RET3	0.0121	0.1712	0.0706776	0.0217	0.6616	0.0327993
	YMR309C	NIP1	0.0121	0.2674	0.0452506	0.0266	0.7344	0.03622
	YIL075C	RPN2	0.0121	0.4727	0.0255976	0.03	1.12	0.0267857
	YFR009W	GCN20	0.0121	0.3842	0.031494	0.0335	0.9176	0.0365083
	YER145C	FTR1	0.0121	0.232	0.0521552	0.0484	1.1662	0.0415023
	YPR082C	DIB1	0.0121	0.2084	0.0580614	0.0562	1.3295	0.0422715
	YLL061W	MMP1	0.0121	0.4283	0.0282512	0.0619	1.139	0.0543459
	YDR277C	MTH1	0.0121	0.3284	0.0368453	0.0694	1.0524	0.0659445
	YGL252C	RTG2	0.0122	0.4007	0.0304467	0.02	2.3163	0.00863446
	YAR018C	KIN3	0.0122	0.2903	0.0420255	0.0314	1.081	0.0290472
	YGR061C	ADE6	0.0122	0.3994	0.0305458	0.0333	1.0153	0.0327982
	YGR074W	SMD1	0.0122	0.5723	0.0213175	0.036	1.2902	0.0279027
	YML051W	GAL80	0.0122	0.3453	0.0353316	0.0384	1.0354	0.0370871
	YDL051W	LHP1	0.0122	0.2394	0.0509607	0.045	0.6617	0.0680066
	YFR024C-A	LSB3	0.0122	0.3554	0.0343275	0.059	1.0933	0.0539651
	YFL014W	HSP12	0.0122	0.1952	0.0625	0.0629	0.5379	0.116936
	YGR262C	BUD32	0.0122	0.4183	0.0291657	0.0642	1.5006	0.0427829
	YGR105W	VMA21	0.0122	0.4565	0.0267251	0.074	1.3193	0.0560904
	YDR372C	VPS74	0.0123	0.2826	0.0435244	0.0302	1.0809	0.0279397
	YDR189W	SLY1	0.0123	0.4914	0.0250305	0.0328	0.9054	0.0362271
	YGR255C	COQ6	0.0123	0.4198	0.0292997	0.041	2.216	0.0185018
	YLR300W	EXG1	0.0123	0.417	0.0294964	0.0492	1.0448	0.0470904
	YOR259C	RPT4	0.0124	0.3401	0.0364599	0.0202	0.9294	0.0217345
	YDR021W	FAL1	0.0124	0.3332	0.0372149	0.0257	1.2391	0.0207409
	YJL167W	ERG20	0.0124	0.2056	0.0603113	0.0272	0.7189	0.0378356
	YER107C	GLE2	0.0124	0.3912	0.0316973	0.034	1.2913	0.0263301
	YHR039C	MSC7	0.0124	0.3106	0.0399227	0.0345	1.2966	0.0266081
	YPL154C	PEP4	0.0124	0.2811	0.0441124	0.035	0.9353	0.0374211
	YJL179W	PFD1	0.0124	0.3926	0.0315843	0.0368	1.1798	0.0311917
	YMR107W	SPG4	0.0124	0.1868	0.0663812	0.1153	1.7318	0.0665781
	YLR348C	DIC1	0.0125	0.2938	0.0425459	0.0331	1.3424	0.0246573
	YLR240W	VPS34	0.0125	0.2491	0.0501807	0.038	0.9585	0.0396453
	YDR525W-A	SNA2	0.0125	0.3615	0.0345781	0.0381	1.2343	0.0308677
	YGR159C	NSR1	0.0125	0.2551	0.0490004	0.0384	0.687	0.0558952
	YOR222W	ODC2	0.0125	0.3373	0.037059	0.0441	0.6668	0.0661368
	YMR302C	YME2	0.0125	0.4014	0.031141	0.0484	1.3497	0.0358598
	YAL007C	ERP2	0.0125	0.3512	0.0355923	0.0645	1.146	0.0562827
	YDR388W	RVS167	0.0125	0.2987	0.041848	0.1102	1.3151	0.0837959
	YCR084C	TUP1	0.0126	0.277	0.0454874	0.0268	0.7651	0.0350281
	YBR039W	ATP3	0.0127	0.2264	0.0560954	0.0217	0.6721	0.0322869
	YOR173W	DCS2	0.0127	0.3215	0.0395023	0.0382	0.81	0.0471605
	YER060W	FCY21	0.0127	0.4423	0.0287135	0.0543	2.3177	0.0234284
	YLR262C	YPT6	0.0128	0.3293	0.0388703	0.0217	1.6241	0.0133612
	YPL002C	SNF8	0.0128	0.3668	0.0348964	0.0303	2.4858	0.0121892
	YGR286C	BIO2	0.0128	0.2694	0.047513	0.0316	1.1379	0.0277705
	YMR243C	ZRC1	0.0128	0.3834	0.0333855	0.0414	0.853	0.0485346
	YHR087W		0.0128	0.4548	0.0281442	0.0547	0.8916	0.0613504
	YBR245C	ISW1	0.0129	0.4091	0.0315326	0.0236	0.9073	0.0260112
	YJL026W	RNR2	0.0129	0.299	0.0431438	0.0248	1.1804	0.0210098
	YOL021C	DIS3	0.0129	0.2855	0.0451839	0.0277	0.9582	0.0289084
	YOR272W	YTM1	0.0129	0.2659	0.0485145	0.0295	0.7443	0.0396346
	YPR094W	RDS3	0.0129	0.3484	0.0370264	0.0324	1.1585	0.0279672
	YCR034W	FEN1	0.0129	0.1597	0.0807765	0.0375	0.8742	0.0428964
	YER056C	FCY2	0.0129	0.3854	0.0334717	0.0406	0.7826	0.0518784
	YHR166C	CDC23	0.0129	0.3095	0.0416801	0.0466	0.8741	0.053312
	YGR155W	CYS4	0.0129	0.3552	0.0363176	0.0521	1.2504	0.0416667
	YDL198C	GGC1	0.013	0.3539	0.0367335	0.0245	1.1635	0.0210572
	YGL187C	COX4	0.013	0.2374	0.0547599	0.0282	0.858	0.0328671
	YPR019W	MCM4	0.013	0.28	0.0464286	0.0306	1.4953	0.0204641
	YBR125C	PTC4	0.013	0.2837	0.0458231	0.0333	1.16	0.0287069
	YAL025C	MAK16	0.013	0.2875	0.0452174	0.0373	1.1631	0.0320695
	YGL105W	ARC1	0.013	0.1898	0.0684932	0.0448	0.4751	0.0942959
	YBL102W	SFT2	0.013	0.3598	0.0361312	0.0466	0.9252	0.0503675
	YGR043C	NQM1	0.013	0.4037	0.0322021	0.0579	1.3573	0.0426582
	YGR211W	ZPR1	0.013	0.3217	0.0404103	0.061	3.1023	0.0196628
	YEL012W	UBC8	0.013	0.3091	0.0420576	0.0661	0.9273	0.0712822
	YOR087W	YVC1	0.013	0.3096	0.0419897	0.0754	1.4494	0.0520215
	YLL039C	UBI4	0.0131	0.5987	0.0218807	0.009	1.3219	0.00680838
	YPR024W	YME1	0.0131	0.4175	0.0313772	0.0288	1.5736	0.018302
	YLR193C	UPS1	0.0131	0.3993	0.0328074	0.0339	1.3694	0.0247554
	YOR326W	MYO2	0.0131	0.3595	0.0364395	0.0391	2.0514	0.0190602
	YMR277W	FCP1	0.0131	0.2679	0.0488988	0.056	0.7836	0.071465
	YOR382W	FIT2	0.0131	0.184	0.0711957	0.0571	0.5212	0.109555
	YJL072C	PSF2	0.0131	0.3464	0.0378176	0.0667	0.7589	0.0878904
	YFL053W	DAK2	0.0131	0.236	0.0555085	0.0825	1.2276	0.0672043
	YMR226C	TMA29	0.0131	0.5276	0.0248294	0.0957	1.644	0.0582117
	YDL108W	KIN28	0.0132	0.4725	0.0279365	0.022	1.1774	0.0186852
	YLR069C	MEF1	0.0132	0.3808	0.0346639	0.0295	2.2629	0.0130364
	YHR094C	HXT1	0.0132	0.2929	0.0450666	0.0336	1.3005	0.0258362
	YOL042W	NGL1	0.0132	0.2851	0.0462995	0.0357	0.9155	0.0389951
	YIL160C	POT1	0.0132	0.414	0.0318841	0.0381	1.2192	0.03125
	YPR051W	MAK3	0.0132	0.2843	0.0464298	0.0415	2.5672	0.0161655
	YCL050C	APA1	0.0132	0.2501	0.0527789	0.0431	0.6956	0.0619609
	YBR214W	SDS24	0.0132	0.3558	0.0370995	0.0437	1.0049	0.0434869
	YCR057C	PWP2	0.0132	0.3269	0.0403793	0.045	1.2494	0.0360173
	YMR056C	AAC1	0.0132	0.4681	0.0281991	0.046	1.4108	0.0326056
	YNL111C	CYB5	0.0132	0.2326	0.0567498	0.0704	0.4645	0.151561
	YPL031C	PHO85	0.0133	0.4537	0.0293145	0.0162	1.0275	0.0157664
	YNR032W	PPG1	0.0133	0.4215	0.031554	0.0238	1.1245	0.021165
	YML124C	TUB3	0.0133	0.5441	0.024444	0.0255	1.226	0.0207993
	YML064C	TEM1	0.0133	0.3232	0.041151	0.0312	1.1781	0.0264833
	YPL117C	IDI1	0.0133	0.2789	0.0476873	0.0313	0.984	0.0318089
	YJL212C	OPT1	0.0133	0.318	0.0418239	0.0365	1.1	0.0331818
	YOR046C	DBP5	0.0133	0.4658	0.028553	0.0411	1.5936	0.0257907
	YLR100W	ERG27	0.0133	0.3693	0.0360141	0.0587	1.0523	0.0557826
	YLR099C	ICT1	0.0133	0.3541	0.03756	0.0621	2.829	0.0219512
	YMR296C	LCB1	0.0133	0.3783	0.0351573	0.0681	1.2306	0.0553389
	YJR104C	SOD1	0.0133	0.2264	0.0587456	1.307	1.5402	0.848591
	YPL204W	HRR25	0.0134	0.2863	0.0468041	0.0253	0.7682	0.0329341
	YOL086C	ADH1	0.0134	0.0732	0.18306	0.0283	0.2235	0.126622
	YKL060C	FBA1	0.0134	0.0497	0.269618	0.0325	0.117	0.277778
	YDR395W	SXM1	0.0134	0.3207	0.0417836	0.0329	0.9287	0.0354259
	YFR010W	UBP6	0.0134	0.3086	0.0434219	0.0385	1.7631	0.0218365
	YIL078W	THS1	0.0134	0.328	0.0408537	0.0441	0.8894	0.049584
	YGL130W	CEG1	0.0134	0.3032	0.0441953	0.0461	1.3793	0.0334228
	YML075C	HMG1	0.0134	0.3819	0.0350877	0.0504	0.9507	0.0530136
	YOL002C	IZH2	0.0134	0.3323	0.040325	0.0522	2.3224	0.0224767
	YPL179W	PPQ1	0.0134	0.3583	0.0373988	0.0551	0.975	0.0565128
	YIR037W	HYR1	0.0134	0.3908	0.0342886	0.0566	0.5926	0.0955113
	YJL172W	CPS1	0.0134	0.3609	0.0371294	0.0634	0.9059	0.0699856
	YHR214W		0.0134	0.2333	0.0574368	0.1118	1.042	0.107294
	YDR308C	SRB7	0.0135	0.3031	0.0445398	0.0323	0.9599	0.0336493
	YLR386W	VAC14	0.0135	0.3405	0.0396476	0.0357	1.9394	0.0184078
	YLR354C	TAL1	0.0135	0.2713	0.0497604	0.0394	0.6335	0.0621942
	YBR265W	TSC10	0.0135	0.3163	0.042681	0.0775	1.1558	0.0670531
	YGL001C	ERG26	0.0136	0.4769	0.0285175	0.0274	1.2884	0.0212667
	YDL006W	PTC1	0.0136	0.3626	0.0375069	0.031	2.1599	0.0143525
	YCR073W-A	SOL2	0.0136	0.323	0.0421053	0.0352	1.3304	0.0264582
	YBR085W	AAC3	0.0136	0.4468	0.0304387	0.0356	0.837	0.0425329
	YFR053C	HXK1	0.0136	0.2272	0.0598592	0.038	0.9899	0.0383877
	YHR098C	SFB3	0.0136	0.3292	0.0413123	0.0381	0.9948	0.0382992
	YPR167C	MET16	0.0136	0.3248	0.0418719	0.0408	0.929	0.0439182
	YDR283C	GCN2	0.0136	0.3359	0.0404882	0.0417	3.2048	0.0130117
	YDR238C	SEC26	0.0136	0.2804	0.0485021	0.0446	0.8304	0.0537091
	YDR377W	ATP17	0.0136	0.4347	0.0312859	0.0471	0.6755	0.0697261
	YDR084C	TVP23	0.0136	0.6057	0.0224534	0.0506	0.7282	0.0694864
	YPL111W	CAR1	0.0136	0.3617	0.0376002	0.075	1.314	0.0570776
	YHR020W		0.0137	0.2424	0.0565182	0.033	0.8145	0.0405157
	YAL048C	GEM1	0.0137	0.3775	0.0362914	0.0409	0.9486	0.0431162
	YFR028C	CDC14	0.0137	0.2724	0.0502937	0.0412	0.828	0.0497585
	YER123W	YCK3	0.0137	0.367	0.0373297	0.0427	0.9502	0.0449379
	YDL147W	RPN5	0.0137	0.3138	0.0436584	0.0485	0.8223	0.0589809
	YBR089C-A	NHP6B	0.0138	0.4412	0.0312783	0.0331	0.9834	0.0336587
	YGL055W	OLE1	0.0138	0.1875	0.0736	0.038	0.551	0.0689655
	YFR021W	ATG18	0.0138	0.263	0.0524715	0.0402	0.8997	0.0446816
	YJR066W	TOR1	0.0138	0.3673	0.0375715	0.0407	1.2746	0.0319316
	YOR016C	ERP4	0.0138	0.2524	0.0546751	0.0444	0.8513	0.0521555
	YGR181W	TIM13	0.0138	0.3509	0.0393274	0.0457	0.5681	0.0804436
	YDR046C	BAP3	0.0138	0.3814	0.0361825	0.052	0.8024	0.0648056
	YIL047C	SYG1	0.0138	0.3681	0.0374898	0.0574	2.8139	0.0203987
	YLR380W	CSR1	0.0138	0.4564	0.0302366	0.0732	1.3054	0.0560748
	YMR131C	RRB1	0.0139	0.3286	0.0423007	0.0291	0.9959	0.0292198
	YLR216C	CPR6	0.0139	0.3317	0.0419053	0.0382	2.2212	0.0171979
	YNL121C	TOM70	0.0139	0.3271	0.0424946	0.0388	0.8867	0.0437578
	YJL124C	LSM1	0.0139	0.2151	0.0646211	0.0496	1.5602	0.0317908
	YNR056C	BIO5	0.0139	0.3476	0.0399885	0.0503	1.304	0.0385736
	YNL243W	SLA2	0.0139	0.3268	0.0425337	0.054	1.4571	0.0370599
	YJL198W	PHO90	0.0139	0.3058	0.0454545	0.0574	1.1721	0.0489719
	YKL045W	PRI2	0.0139	0.2964	0.0468961	0.0645	1.1944	0.054002
	YER154W	OXA1	0.0139	0.3297	0.0421595	0.1112	0.7843	0.141782
	YHR013C	ARD1	0.014	0.2832	0.049435	0.0204	1.3611	0.0149879
	YLR163C	MAS1	0.014	0.4041	0.0346449	0.0287	1.5597	0.018401
	YOR361C	PRT1	0.014	0.3492	0.0400916	0.0317	1.0518	0.0301388
	YOR244W	ESA1	0.014	0.486	0.0288066	0.0328	1.5706	0.0208837
	YPL030W	TRM44	0.014	0.3387	0.0413345	0.0356	2.2062	0.0161363
	YDR047W	HEM12	0.014	0.3743	0.0374032	0.0364	0.9052	0.0402121
	YBR247C	ENP1	0.014	0.3993	0.0350614	0.0503	0.8687	0.0579026
	YAL026C	DRS2	0.0141	0.3743	0.0376703	0.0372	1.2386	0.0300339
	YDR427W	RPN9	0.0141	0.3468	0.0406574	0.0417	0.9518	0.0438117
	YLR289W	GUF1	0.0141	0.37	0.0381081	0.0469	2.0445	0.0229396
	YLR192C	HCR1	0.0141	0.3376	0.0417654	0.05	0.9794	0.0510517
	YMR145C	NDE1	0.0141	0.3196	0.0441176	0.0511	1.025	0.0498537
	YMR139W	RIM11	0.0142	0.3537	0.040147	0.022	1.0461	0.0210305
	YGL238W	CSE1	0.0142	0.2775	0.0511712	0.0337	0.8305	0.040578
	YOL133W	HRT1	0.0142	0.3091	0.0459398	0.042	1.3164	0.0319052
	YCR059C	YIH1	0.0142	0.4211	0.0337212	0.0467	1.6892	0.0276462
	YDR346C	SVF1	0.0142	0.3953	0.0359221	0.0908	1.5305	0.059327
	YGL211W	NCS6	0.0143	0.4149	0.0344661	0.0311	1.1527	0.0269801
	YPL091W	GLR1	0.0143	0.3608	0.0396341	0.0374	0.8064	0.046379
	YJL033W	HCA4	0.0143	0.3305	0.0432678	0.0405	1.017	0.039823
	YIL043C	CBR1	0.0143	0.2765	0.0517179	0.051	1.2488	0.0408392
	YER057C	HMF1	0.0143	0.37	0.0386486	0.0778	0.4768	0.163171
	YNL132W	KRE33	0.0144	0.3845	0.0374512	0.0284	1.3541	0.0209733
	YNL290W	RFC3	0.0144	0.3978	0.0361991	0.0497	1.2871	0.0386139
	YML100W	TSL1	0.0144	0.3645	0.0395062	0.0554	1.2328	0.0449384
	YOR159C	SME1	0.0144	0.241	0.059751	0.0782	1.6332	0.0478815
	YJR107W		0.0144	0.2559	0.056272	0.1083	1.2183	0.0888944
	YLL019C	KNS1	0.0145	0.3348	0.0433094	0.044	2.0041	0.021955
	YKL003C	MRP17	0.0145	0.2643	0.0548619	0.0452	0.8166	0.0553515
	YDR406W	PDR15	0.0145	0.3707	0.0391152	0.0452	1.2401	0.0364487
	YDR384C	ATO3	0.0145	0.3422	0.0423729	0.0456	1.4219	0.0320698
	YML110C	COQ5	0.0145	0.451	0.0321508	0.0501	1.0436	0.0480069
	YNL185C	MRPL19	0.0145	0.4171	0.0347638	0.0523	1.8272	0.028623
	YJL003W	COX16	0.0145	0.4562	0.0317843	0.0523	0.899	0.0581758
	YDR536W	STL1	0.0145	0.3443	0.0421144	0.0588	1.044	0.0563218
	YOR260W	GCD1	0.0145	0.2928	0.0495219	0.0619	0.7377	0.0839094
	YPR194C	OPT2	0.0145	0.4086	0.035487	0.07	1.1957	0.0585431
	YNL021W	HDA1	0.0146	0.3284	0.044458	0.0321	1.6866	0.0190324
	YPR131C	NAT3	0.0146	0.3257	0.0448265	0.0343	1.1071	0.0309818
	YOL124C	TRM11	0.0146	0.4751	0.0307304	0.042	0.8189	0.0512883
	YCR011C	ADP1	0.0146	0.3342	0.0436864	0.0497	1.3184	0.0376972
	YDL213C	NOP6	0.0146	0.5321	0.0274385	0.0529	1.2362	0.0427924
	YKL192C	ACP1	0.0146	0.2354	0.0620221	0.0542	1.9427	0.0278993
	YCL044C	MGR1	0.0146	0.3199	0.0456393	0.0681	1.1089	0.0614122
	YLR034C	SMF3	0.0147	0.4386	0.0335157	0.0251	1.1056	0.0227026
	YIL035C	CKA1	0.0147	0.1999	0.0735368	0.0283	0.9216	0.0307075
	YJR152W	DAL5	0.0147	0.3199	0.0459519	0.039	1.0389	0.0375397
	YFL028C	CAF16	0.0147	0.4363	0.0336924	0.0461	0.9364	0.0492311
	YER021W	RPN3	0.0147	0.2986	0.0492297	0.0478	0.8694	0.0549804
	YBR149W	ARA1	0.0147	0.3206	0.0458515	0.05	0.7289	0.0685965
	YMR088C	VBA1	0.0147	0.2576	0.0570652	0.0513	0.7602	0.0674822
	YML041C	VPS71	0.0147	0.511	0.0287671	0.0538	1.4833	0.0362705
	YJR001W	AVT1	0.0147	0.3492	0.0420962	0.0584	1.4536	0.0401761
	YHR018C	ARG4	0.0148	0.3616	0.0409292	0.0222	1.4878	0.0149214
	YIR031C	DAL7	0.0148	0.2975	0.0497479	0.0325	1.2832	0.0253273
	YLR078C	BOS1	0.0148	0.3731	0.0396676	0.0419	1.7724	0.0236403
	YPR159W	KRE6	0.0148	0.2977	0.0497145	0.0589	1.3478	0.0437008
	YKL211C	TRP3	0.0148	0.3146	0.0470439	0.0606	0.9288	0.0652455
	YGR141W	VPS62	0.0148	0.3285	0.0450533	0.0866	1.0221	0.0847275
	YHR139C	SPS100	0.0148	0.4026	0.0367611	0.125	1.5547	0.0804014
	YGR252W	GCN5	0.0149	0.2762	0.0539464	0.0325	1.0434	0.0311482
	YMR298W	LIP1	0.0149	0.4258	0.034993	0.0377	0.6743	0.0559098
	YGR087C	PDC6	0.0149	0.3948	0.0377406	0.0382	1.6072	0.023768
	YDR011W	SNQ2	0.0149	0.3635	0.0409904	0.0393	1.4685	0.026762
	YKL002W	DID4	0.0149	0.3167	0.0470477	0.0398	1.1575	0.0343844
	YKL166C	TPK3	0.0149	0.3456	0.0431134	0.0436	0.7922	0.0550366
	YOL016C	CMK2	0.0149	0.3123	0.0477105	0.0456	1.895	0.0240633
	YNL003C	PET8	0.0149	0.3574	0.04169	0.0463	0.8823	0.0524765
	YER026C	CHO1	0.0149	0.312	0.0477564	0.0469	1.5113	0.0310329
	YNL251C	NRD1	0.0149	0.345	0.0431884	0.0579	1.2555	0.0461171
	YML098W	TAF13	0.0149	0.3298	0.0451789	0.0713	1.27	0.0561417
	YBL093C	ROX3	0.015	0.2847	0.052687	0.0333	1.0937	0.0304471
	YLR172C	DPH5	0.015	0.579	0.0259067	0.0376	1.6645	0.0225894
	YLR450W	HMG2	0.015	0.4387	0.0341919	0.0452	1.8938	0.0238674
	YEL071W	DLD3	0.015	0.3312	0.0452899	0.0614	1.7839	0.034419
	YPL271W	ATP15	0.015	0.3981	0.037679	0.0861	0.6335	0.135912
	YGL163C	RAD54	0.0151	0.3659	0.0412681	0.0288	1.1328	0.0254237
	YHR069C	RRP4	0.0151	0.4297	0.0351408	0.0418	2.6723	0.015642
	YLR375W	STP3	0.0151	0.2919	0.05173	0.0492	1.299	0.0378753
	YDR339C	FCF1	0.0152	0.4705	0.0323061	0.0168	1.2485	0.0134561
	YHR049W	FSH1	0.0152	0.2693	0.0564426	0.0297	0.7337	0.0404798
	YNL281W	HCH1	0.0152	0.2201	0.0690595	0.0345	0.4469	0.0771985
	YDR363W-A	SEM1	0.0152	0.2875	0.0528696	0.0422	0.4721	0.0893878
	YLR220W	CCC1	0.0152	0.2937	0.0517535	0.0457	0.9752	0.0468622
	YKR046C	PET10	0.0152	0.3175	0.047874	0.0461	0.9317	0.0494794
	YPL087W	YDC1	0.0152	0.4104	0.037037	0.0496	1.0117	0.0490264
	YAR003W	SWD1	0.0152	0.3203	0.0474555	0.0505	1.0765	0.0469113
	YNL211C		0.0152	0.2864	0.0530726	0.0625	1.1101	0.0563012
	YJL050W	MTR4	0.0153	0.3824	0.0400105	0.027	0.8288	0.0325772
	YCL054W	SPB1	0.0153	0.2344	0.065273	0.0355	0.9654	0.0367723
	YDR267C	CIA1	0.0153	0.3394	0.0450796	0.0374	0.8432	0.0443548
	YDR456W	NHX1	0.0153	0.3984	0.0384036	0.0431	1.0903	0.0395304
	YOL020W	TAT2	0.0153	0.2664	0.0574324	0.0468	0.8783	0.0532848
	YBR200W	BEM1	0.0153	0.2927	0.052272	0.0603	1.8012	0.0334777
	YER077C		0.0153	0.0482	0.317427	0.1587	1.1235	0.141255
	YOR161C	PNS1	0.0153	0.3624	0.0422185	0.1593	1.2159	0.131014
	YGL127C	SOH1	0.0153	0.2389	0.0640435	1.1722	1.5939	0.735429
	YJR068W	RFC2	0.0154	0.2664	0.0578078	0.0372	1.1397	0.0326402
	YJL200C	ACO2	0.0155	0.3993	0.0388179	0.0264	0.9136	0.0288967
	YGL232W	TAN1	0.0155	0.3922	0.0395207	0.0324	0.8769	0.0369483
	YLR357W	RSC2	0.0155	0.2947	0.0525959	0.0391	1.21	0.032314
	YBR171W	SEC66	0.0155	0.4547	0.0340884	0.0427	0.5452	0.0783199
	YNL236W	SIN4	0.0155	0.4532	0.0342012	0.0462	1.0449	0.0442148
	YOR276W	CAF20	0.0155	0.1713	0.0904845	0.0477	0.5824	0.0819025
	YGR202C	PCT1	0.0155	0.3106	0.0499034	0.0691	1.3316	0.0518925
	YBR162C	TOS1	0.0155	0.3474	0.0446172	0.0711	2.518	0.0282367
	YFL031W	HAC1	0.0155	0.1663	0.0932051	0.1196	0.7906	0.151278
	YNL014W	HEF3	0.0156	0.4431	0.0352065	0.0302	1.4829	0.0203655
	YHR064C	SSZ1	0.0156	0.2419	0.0644895	0.0325	0.8659	0.0375332
	YBR291C	CTP1	0.0156	0.4439	0.0351431	0.0339	0.9609	0.0352794
	YPL004C	LSP1	0.0156	0.3633	0.0429397	0.0351	1.7446	0.0201192
	YNL099C	OCA1	0.0156	0.3573	0.0436608	0.0392	1.4066	0.0278686
	YDR497C	ITR1	0.0156	0.3477	0.0448663	0.0511	1.1566	0.0441812
	YDR302W	GPI11	0.0156	0.2587	0.0603015	0.052	1.4901	0.034897
	YCR063W	BUD31	0.0156	0.211	0.0739336	0.0594	3.3384	0.017793
	YDR492W	IZH1	0.0156	0.2342	0.0666097	0.0608	1.2232	0.0497057
	YGL043W	DST1	0.0156	0.2665	0.0585366	0.0635	0.6099	0.104115
	YKL142W	MRP8	0.0156	0.375	0.0416	0.0652	1.5678	0.0415869
	YML125C	PGA3	0.0156	0.1466	0.106412	0.085	0.7024	0.121014
	YDL001W	RMD1	0.0157	0.3636	0.0431793	0.0295	1.7771	0.0166001
	YDR432W	NPL3	0.0157	0.3317	0.0473319	0.032	0.8739	0.0366175
	YHR206W	SKN7	0.0157	0.3621	0.0433582	0.0484	1.4569	0.0332212
	YOL146W	PSF3	0.0157	0.5247	0.0299219	0.0503	1.8304	0.0274803
	YML016C	PPZ1	0.0157	0.3086	0.0508749	0.0539	1.147	0.0469922
	YER089C	PTC2	0.0157	0.3099	0.0506615	0.0821	1.7702	0.0463789
	YDR429C	TIF35	0.0158	0.225	0.0702222	0.0288	0.7689	0.0374561
	YDR293C	SSD1	0.0158	0.4704	0.0335884	0.04	2.355	0.0169851
	YJR049C	UTR1	0.0158	0.5385	0.0293408	0.0412	1.3386	0.0307784
	YOR294W	RRS1	0.0158	0.3018	0.0523526	0.0454	0.6786	0.0669024
	YGR121C	MEP1	0.0158	0.3907	0.0404402	0.0475	1.254	0.0378788
	YGR076C	MRPL25	0.0158	0.3529	0.0447719	0.0577	0.6704	0.086068
	YMR246W	FAA4	0.0158	0.3375	0.0468148	0.1099	1.1736	0.0936435
	YNR013C	PHO91	0.0159	0.2915	0.0545455	0.037	0.8858	0.0417702
	YGL077C	HNM1	0.0159	0.5056	0.0314478	0.0389	1.1024	0.0352866
	YLR056W	ERG3	0.0159	0.2764	0.0575253	0.041	0.8339	0.0491666
	YGL094C	PAN2	0.0159	0.5181	0.0306891	0.0448	1.6518	0.0271219
	YER100W	UBC6	0.0159	0.4758	0.0334174	0.0582	1.0582	0.0549991
	YBR093C	PHO5	0.0159	0.4469	0.0355784	0.0745	0.6227	0.11964
	YIL154C	IMP2'	0.0159	0.5359	0.0296697	0.0757	2.4604	0.0307674
	YNL280C	ERG24	0.016	0.2573	0.0621842	0.0285	1.1598	0.0245732
	YNL248C	RPA49	0.016	0.3508	0.04561	0.0349	1.0821	0.0322521
	YGR094W	VAS1	0.016	0.2736	0.0584795	0.0364	1.0052	0.0362117
	YAR002C-A	ERP1	0.016	0.339	0.0471976	0.0639	1.1512	0.0555073
	YKR065C	PAM17	0.016	0.4014	0.0398605	0.0821	2.175	0.0377471
	YJL036W	SNX4	0.0161	0.4207	0.0382696	0.0292	1.2878	0.0226743
	YJR117W	STE24	0.0161	0.2518	0.0639396	0.0378	0.8991	0.042042
	YMR002W	MIC17	0.0161	0.3131	0.0514213	0.0436	0.7177	0.0607496
	YML012W	ERV25	0.0161	0.167	0.0964072	0.0448	0.5803	0.0772014
	YOL119C	MCH4	0.0161	0.3589	0.0448593	0.0508	1.54	0.032987
	YDL045C	FAD1	0.0161	0.3281	0.0490704	0.0699	0.7452	0.0938003
	YHR072W-A	NOP10	0.0162	0.1588	0.102015	0.0229	0.5382	0.0425492
	YCR005C	CIT2	0.0162	0.3967	0.0408369	0.0258	1.0783	0.0239266
	YDL111C	RRP42	0.0162	0.374	0.0433155	0.0365	0.871	0.0419059
	YIL138C	TPM2	0.0162	0.2633	0.0615268	0.0365	1.468	0.0248638
	YML008C	ERG6	0.0162	0.3019	0.0536602	0.0393	0.9786	0.0401594
	YLL048C	YBT1	0.0162	0.3095	0.0523425	0.0482	1.0061	0.0479078
	YDL159W	STE7	0.0162	0.3805	0.0425756	0.0521	1.0517	0.0495388
	YLR383W	SMC6	0.0162	0.3408	0.0475352	0.0556	1.5659	0.0355067
	YGR232W	NAS6	0.0162	0.3255	0.0497696	0.0665	1.4014	0.0474525
	YNL081C	SWS2	0.0162	0.516	0.0313953	0.0816	4.2105	0.0193801
	YMR307W	GAS1	0.0162	0.4582	0.0353557	0.0836	1.1436	0.0731025
	YLR438C-A	LSM3	0.0163	0.3768	0.043259	0.0235	1.3835	0.0169859
	YDL072C	YET3	0.0163	0.355	0.0459155	0.0418	0.9276	0.0450625
	YGR247W	CPD1	0.0163	0.3186	0.0511613	0.0557	1.6404	0.0339551
	YML035C	AMD1	0.0164	0.3388	0.0484061	0.0126	1.2484	0.0100929
	YLR371W	ROM2	0.0164	0.3707	0.0442406	0.0463	1.2739	0.0363451
	YBR079C	RPG1	0.0164	0.3153	0.052014	0.0558	1.2595	0.0443033
	YNL101W	AVT4	0.0164	0.4478	0.0366235	0.0565	1.1525	0.0490239
	YFR023W	PES4	0.0164	0.3823	0.0428982	0.0613	0.9757	0.0628267
	YBL022C	PIM1	0.0164	0.331	0.0495468	0.0625	1.1563	0.0540517
	YLR092W	SUL2	0.0164	0.3747	0.0437683	0.0676	1.363	0.0495965
	YML070W	DAK1	0.0165	0.3659	0.0450943	0.035	1.7116	0.0204487
	YNL277W	MET2	0.0165	0.448	0.0368304	0.0404	1.3695	0.0294998
	YER049W	TPA1	0.0165	0.3399	0.0485437	0.0455	1.3826	0.032909
	YGL037C	PNC1	0.0165	0.2594	0.0636083	0.0466	1.0565	0.0441079
	YDR297W	SUR2	0.0165	0.3294	0.0500911	0.0469	1.3959	0.0335984
	YHR175W	CTR2	0.0165	0.3122	0.0528507	0.0773	0.9018	0.0857175
	YJR105W	ADO1	0.0166	0.2174	0.0763569	0.0304	1.8826	0.0161479
	YGR057C	LST7	0.0166	0.3683	0.045072	0.0382	2.6773	0.0142681
	YGL100W	SEH1	0.0166	0.4866	0.0341143	0.0417	0.9146	0.0455937
	YHR042W	NCP1	0.0166	0.305	0.0544262	0.0419	1.0456	0.0400727
	YPL118W	MRP51	0.0166	0.3078	0.0539311	0.045	0.9117	0.0493583
	YLR087C	CSF1	0.0166	0.4032	0.0411706	0.0628	1.1783	0.0532971
	YJL088W	ARG3	0.0166	0.3943	0.0420999	0.0669	1.3071	0.051182
	YCL034W	LSB5	0.0166	0.4356	0.0381084	0.0711	1.0891	0.0652833
	YMR251W-A	HOR7	0.0167	0.2314	0.0721694	0.017	0.4594	0.0370048
	YMR313C	TGL3	0.0167	0.43	0.0388372	0.0329	1.701	0.0193416
	YML127W	RSC9	0.0167	0.2663	0.0627112	0.0383	0.9414	0.0406841
	YGL244W	RTF1	0.0167	0.28	0.0596429	0.0425	0.9913	0.042873
	YGR100W	MDR1	0.0168	0.3813	0.0440598	0.0384	1.3561	0.0283165
	YKL205W	LOS1	0.0168	0.2708	0.0620384	0.047	0.9156	0.0513325
	YAL009W	SPO7	0.0168	0.2888	0.0581717	0.0475	0.6684	0.0710652
	YIL162W	SUC2	0.0168	0.4946	0.0339668	0.0487	0.9346	0.0521079
	YFL016C	MDJ1	0.0168	0.3798	0.0442338	0.0504	1.4822	0.0340035
	YKL138C	MRPL31	0.0168	0.5321	0.031573	0.0534	0.835	0.0639521
	YDR321W	ASP1	0.0168	0.3296	0.0509709	0.0623	1.4586	0.0427122
	YGR285C	ZUO1	0.0169	0.203	0.0832512	0.0264	0.5464	0.0483163
	YPR100W	MRPL51	0.0169	0.376	0.0449468	0.0391	0.564	0.0693262
	YNL169C	PSD1	0.0169	0.3718	0.0454545	0.0421	1.101	0.038238
	YOL030W	GAS5	0.0169	0.4317	0.0391476	0.0598	1.8857	0.0317124
	YAL041W	CDC24	0.0169	0.4397	0.0384353	0.0609	1.2793	0.0476042
	YMR004W	MVP1	0.0169	0.2955	0.0571912	0.1046	0.9623	0.108698
	YCL030C	HIS4	0.017	0.3371	0.0504301	0.0452	0.7159	0.0631373
	YMR033W	ARP9	0.017	0.4186	0.0406116	0.0511	0.9135	0.0559387
	YOR067C	ALG8	0.017	0.3354	0.0506857	0.0544	0.9761	0.055732
	YCR037C	PHO87	0.017	0.4558	0.0372971	0.055	1.4094	0.0390237
	YMR062C	ECM40	0.017	0.3688	0.0460954	0.0604	1.5072	0.0400743
	YOR348C	PUT4	0.017	0.4252	0.0399812	0.0613	1.7368	0.0352948
	YIL016W	SNL1	0.017	0.5469	0.0310843	0.134	0.8844	0.151515
	YDR448W	ADA2	0.0171	0.586	0.0291809	0.0246	1.2127	0.0202853
	YJL085W	EXO70	0.0171	0.4621	0.037005	0.0335	2.1397	0.0156564
	YDR375C	BCS1	0.0171	0.4378	0.0390589	0.0375	1.0774	0.034806
	YGR245C	SDA1	0.0171	0.3591	0.047619	0.0483	1.0658	0.0453181
	YIL022W	TIM44	0.0171	0.3394	0.050383	0.0514	1.5918	0.0322905
	YLR288C	MEC3	0.0171	0.4048	0.0422431	0.0566	1.2654	0.0447289
	YLR234W	TOP3	0.0171	0.3856	0.0443465	0.0568	1.1538	0.0492286
	YMR054W	STV1	0.0171	0.2952	0.0579268	0.0595	0.9453	0.062943
	YBR293W	VBA2	0.0171	0.3546	0.0482234	0.0755	1.0574	0.0714016
	YHR027C	RPN1	0.0172	0.3288	0.0523114	0.0266	1.0047	0.0264756
	YDR454C	GUK1	0.0172	0.4599	0.0373994	0.063	0.9976	0.0631516
	YNL268W	LYP1	0.0172	0.3703	0.0464488	0.0698	0.8343	0.083663
	YHR089C	GAR1	0.0173	0.2555	0.0677104	0.0289	0.5116	0.0564894
	YKL110C	KTI12	0.0173	0.325	0.0532308	0.0365	1.6497	0.0221252
	YJR124C		0.0173	0.2931	0.0590242	0.0394	0.8822	0.0446611
	YIR026C	YVH1	0.0173	0.2907	0.0595115	0.0401	1.357	0.0295505
	YHR030C	SLT2	0.0173	0.299	0.0578595	0.0475	0.7624	0.0623033
	YBR287W	ZSP1	0.0173	0.347	0.0498559	0.0514	1.2875	0.0399223
	YPL252C	YAH1	0.0173	0.2779	0.0622526	0.0604	1.7536	0.0344434
	YDL225W	SHS1	0.0173	0.4041	0.0428112	0.063	1.0341	0.0609225
	YKR066C	CCP1	0.0173	0.4275	0.0404678	0.0799	1.2796	0.0624414
	YOR337W	TEA1	0.0173	0.3122	0.0554132	0.08	0.9942	0.0804667
	YBR049C	REB1	0.0173	0.3364	0.0514269	0.0816	1.0228	0.079781
	YJL192C	SOP4	0.0173	0.5622	0.030772	0.0889	1.3946	0.0637459
	YDL222C	FMP45	0.0173	0.3449	0.0501595	0.0947	1.6212	0.0584135
	YDL004W	ATP16	0.0174	0.4868	0.0357436	0.0418	0.7577	0.055167
	YDR172W	SUP35	0.0174	0.3384	0.0514184	0.0464	1.223	0.0379395
	YMR199W	CLN1	0.0174	0.2747	0.0633418	0.0465	0.8656	0.05372
	YKR039W	GAP1	0.0174	0.4549	0.0382502	0.0687	0.8314	0.0826317
	YLR203C	MSS51	0.0175	0.2971	0.0589027	0.0293	0.7926	0.0369669
	YDR301W	CFT1	0.0175	0.3698	0.0473229	0.0354	1.1232	0.0315171
	YIL103W	DPH1	0.0175	0.3535	0.049505	0.0362	0.9263	0.0390802
	YLL031C	GPI13	0.0175	0.3073	0.0569476	0.0413	0.8463	0.0488007
	YKL041W	VPS24	0.0175	0.2529	0.0691973	0.043	1.0291	0.0417841
	YBR003W	COQ1	0.0175	0.47	0.037234	0.0441	1.5065	0.0292731
	YGL087C	MMS2	0.0176	0.551	0.0319419	0.0137	0.7016	0.0195268
	YNL007C	SIS1	0.0176	0.4603	0.0382359	0.0207	1.5302	0.0135276
	YPR166C	MRP2	0.0176	0.2643	0.066591	0.031	1.2124	0.0255691
	YLR027C	AAT2	0.0176	0.3246	0.0542206	0.0348	2.5084	0.0138734
	YBR263W	SHM1	0.0176	0.258	0.0682171	0.0363	0.6053	0.0599703
	YIL129C	TAO3	0.0176	0.3453	0.0509702	0.0386	1.2681	0.0304392
	YHR024C	MAS2	0.0176	0.3106	0.0566645	0.0475	1.1136	0.0426545
	YGR049W	SCM4	0.0176	0.351	0.0501425	0.0617	1.1654	0.0529432
	YIL046W	MET30	0.0176	0.3534	0.0498019	0.072	1.7834	0.0403723
	YDR232W	HEM1	0.0177	0.313	0.0565495	0.0288	1.0516	0.0273868
	YNL123W	NMA111	0.0177	0.3707	0.0477475	0.039	1.528	0.0255236
	YHR005C	GPA1	0.0177	0.2898	0.0610766	0.0474	1.6795	0.0282227
	YER006W	NUG1	0.0177	0.291	0.0608247	0.048	0.6958	0.0689853
	YBR132C	AGP2	0.0177	0.2971	0.0595759	0.0541	1.1294	0.0479015
	YJL155C	FBP26	0.0177	0.2953	0.059939	0.0571	1.1577	0.0493219
	YEL006W	YEA6	0.0177	0.3823	0.0462987	0.0723	0.9131	0.0791808
	YPL019C	VTC3	0.0177	0.3162	0.0559772	0.0853	1.5293	0.0557772
	YPL082C	MOT1	0.0178	0.3897	0.0456762	0.0358	1.558	0.0229782
	YDL230W	PTP1	0.0178	0.4653	0.0382549	0.0785	1.1894	0.0659997
	YBR014C	GRX6	0.0178	0.0758	0.234828	0.2256	0.77	0.292987
	YDL227C	HO	0.0179	0.4191	0.0427106	0.04	1.0937	0.0365731
	YMR202W	ERG2	0.0179	0.2643	0.0677261	0.0501	0.8419	0.0595083
	YGR191W	HIP1	0.0179	0.3095	0.0578352	0.0554	0.9083	0.0609931
	YOR049C	RSB1	0.0179	0.3677	0.048681	0.1214	1.0365	0.117125
	YKL180W	RPL17A	0.018	0.1401	0.12848	0.0173	0.1228	0.140879
	YGR185C	TYS1	0.018	0.2928	0.0614754	0.0174	1.3519	0.0128708
	YHR186C	KOG1	0.018	0.3527	0.0510349	0.0384	2.1724	0.0176763
	YOL064C	MET22	0.018	0.2554	0.0704777	0.042	1.1425	0.0367615
	YJR014W	TMA22	0.018	0.3172	0.0567465	0.0494	1.2025	0.0410811
	YJR137C	ECM17	0.018	0.3596	0.0500556	0.0502	0.9774	0.0513608
	YAL061W	BDH2	0.018	0.4087	0.0440421	0.0611	2.0412	0.0299334
	YBR037C	SCO1	0.018	0.3424	0.0525701	0.0779	1.3177	0.0591182
	YHR135C	YCK1	0.0181	0.5109	0.0354277	0.0382	1.9479	0.0196109
	YOR086C	TCB1	0.0181	0.4188	0.0432187	0.0484	1.1561	0.0418649
	YGR047C	TFC4	0.0181	0.4852	0.0373042	0.0547	2.0175	0.0271128
	YFL030W	AGX1	0.0181	0.3251	0.0556752	0.0552	1.8011	0.0306479
	YBR252W	DUT1	0.0181	0.4246	0.0426284	0.0559	0.8369	0.0667941
	YKL212W	SAC1	0.0181	0.3773	0.0479724	0.0575	0.9692	0.0593273
	YDR164C	SEC1	0.0181	0.3582	0.0505304	0.0601	2.6768	0.0224522
	YGL209W	MIG2	0.0181	0.2645	0.068431	0.0667	1.1117	0.0599982
	YGL178W	MPT5	0.0181	0.3316	0.0545838	0.0676	1.1902	0.0567972
	YOL055C	THI20	0.0181	0.4414	0.0410059	0.0879	1.1601	0.0757693
	YIL084C	SDS3	0.0182	0.5093	0.0357353	0.0227	1.3176	0.0172283
	YOR070C	GYP1	0.0182	0.3711	0.0490434	0.0387	1.7017	0.022742
	YOR027W	STI1	0.0182	0.2897	0.0628236	0.0389	1.0541	0.0369035
	YLR390W	ECM19	0.0182	0.4835	0.0376422	0.1043	1.3789	0.07564
	YPR062W	FCY1	0.0183	0.3428	0.0533839	0.0121	1.0992	0.011008
	YOR002W	ALG6	0.0183	0.355	0.0515493	0.0295	2.3039	0.0128044
	YDR311W	TFB1	0.0183	0.3189	0.0573848	0.039	1.2413	0.0314187
	YGL078C	DBP3	0.0183	0.382	0.0479058	0.0417	1.0055	0.0414719
	YAL021C	CCR4	0.0183	0.2581	0.0709028	0.0441	1.0079	0.0437543
	YPL263C	KEL3	0.0183	0.3686	0.0496473	0.0552	1.0647	0.0518456
	YDL002C	NHP10	0.0183	0.4028	0.045432	0.0562	0.6007	0.0935575
	YMR008C	PLB1	0.0183	0.3617	0.0505944	0.0597	1.1946	0.0499749
	YFL017W-A	SMX2	0.0183	0.2566	0.0713172	0.062	0.7187	0.0862669
	YML111W	BUL2	0.0183	0.2903	0.0630382	0.0627	1.0702	0.0585872
	YPL023C	MET12	0.0184	0.3456	0.0532407	0.0284	1.0144	0.0279968
	YEL063C	CAN1	0.0184	0.3499	0.0525865	0.0592	1.1673	0.0507153
	YBL032W	HEK2	0.0184	0.4127	0.0445844	0.064	1.6087	0.0397837
	YPL057C	SUR1	0.0184	0.5517	0.0333515	0.0839	1.7642	0.047557
	YJL134W	LCB3	0.0184	0.349	0.0527221	0.0899	3.0579	0.0293993
	YMR319C	FET4	0.0184	0.4897	0.037574	0.1177	3.3089	0.0355707
	YOR226C	ISU2	0.0185	0.2624	0.070503	0.0175	1.464	0.0119536
	YGL106W	MLC1	0.0185	0.3319	0.0557397	0.0325	1.039	0.0312801
	YBL024W	NCL1	0.0185	0.3258	0.0567833	0.0385	0.876	0.0439498
	YGL097W	SRM1	0.0185	0.3852	0.048027	0.0614	1.0001	0.0613939
	YBR041W	FAT1	0.0185	0.3296	0.0561286	0.0674	1.152	0.0585069
	YDR246W	TRS23	0.0185	0.5153	0.0359014	0.1482	1.0975	0.135034
	YLL008W	DRS1	0.0186	0.3357	0.0554066	0.0258	0.6966	0.037037
	YGL099W	LSG1	0.0186	0.379	0.0490765	0.0359	1.5986	0.0224572
	YOL140W	ARG8	0.0186	0.4227	0.0440028	0.042	1.1365	0.0369556
	YOR074C	CDC21	0.0186	0.313	0.0594249	0.0433	1.2929	0.0334906
	YLR098C	CHA4	0.0186	0.2891	0.0643376	0.0532	0.9443	0.056338
	YOR048C	RAT1	0.0186	0.3463	0.0537107	0.0548	1.4415	0.038016
	YGL140C		0.0186	0.4134	0.0449927	0.0577	2.492	0.0231541
	YOR163W	DDP1	0.0186	0.5088	0.0365566	0.0882	3.2526	0.0271168
	YER003C	PMI40	0.0187	0.2614	0.0715379	0.0343	0.656	0.0522866
	YGL003C	CDH1	0.0187	0.4227	0.0442394	0.0362	1.2415	0.0291583
	YDR529C	QCR7	0.0187	0.336	0.0556548	0.0442	1.3131	0.0336608
	YFR047C	BNA6	0.0187	0.2928	0.0638661	0.0453	0.7647	0.0592389
	YHL034C	SBP1	0.0187	0.257	0.0727626	0.0508	0.5701	0.0891072
	YMR024W	MRPL3	0.0187	0.275	0.068	0.0537	0.8165	0.0657685
	YKL086W	SRX1	0.0187	0.2329	0.080292	1.362	1.0241	1.32995
	YJL177W	RPL17B	0.0188	0.1902	0.0988433	0.0171	0.287	0.0595819
	YBR072W	HSP26	0.0188	0.2641	0.0711852	0.0343	0.5358	0.0640164
	YDL190C	UFD2	0.0188	0.3907	0.0481188	0.0377	1.0444	0.0360973
	YGL156W	AMS1	0.0188	0.3537	0.0531524	0.0383	1.8725	0.0204539
	YBR234C	ARC40	0.0188	0.299	0.0628763	0.0563	0.993	0.0566969
	YLR166C	SEC10	0.0188	0.3498	0.053745	0.0568	0.9372	0.0606061
	YMR235C	RNA1	0.0188	0.3417	0.055019	0.058	0.7729	0.075042
	YHR123W	EPT1	0.0188	0.3476	0.0540852	0.0588	0.9638	0.0610085
	YMR072W	ABF2	0.0188	1.624	0.0115764	0.1085	2.9753	0.0364669
	YGR209C	TRX2	0.0189	0.1818	0.10396	0.0141	0.9173	0.0153712
	YLR410W	VIP1	0.0189	0.3816	0.0495283	0.0429	1.7171	0.024984
	YPL175W	SPT14	0.0189	0.3332	0.0567227	0.049	1.1847	0.0413607
	YCL043C	PDI1	0.0189	0.3587	0.0526903	0.0703	1.1842	0.059365
	YIL006W	YIA6	0.0189	0.3051	0.0619469	0.0722	0.9964	0.0724609
	YOR265W	RBL2	0.0189	0.5201	0.0363392	0.0763	1.0711	0.0712352
	YML048W	GSF2	0.0189	0.3773	0.0500928	0.0788	1.2658	0.0622531
	YBR283C	SSH1	0.019	0.3264	0.0582108	0.0368	0.8249	0.0446115
	YKL157W	APE2	0.019	0.4371	0.0434683	0.0414	0.9745	0.0424833
	YMR261C	TPS3	0.019	0.3813	0.0498295	0.0486	2.2397	0.0216993
	YGL202W	ARO8	0.019	0.3194	0.0594865	0.0531	1.0859	0.0488995
	YMR006C	PLB2	0.019	0.4214	0.0450878	0.0582	1.038	0.0560694
	YPR111W	DBF20	0.019	0.4786	0.0396991	0.0595	1.3386	0.0444494
	YPR034W	ARP7	0.019	0.2487	0.0763973	0.0616	1.2981	0.047454
	YMR039C	SUB1	0.019	0.2311	0.0822155	0.0666	1.0311	0.0645912
	YJL115W	ASF1	0.019	0.3506	0.0541928	0.0696	1.2098	0.0575302
	YOR252W	TMA16	0.019	0.2683	0.0708163	0.0874	1.1461	0.0762586
	YBL016W	FUS3	0.0191	0.401	0.0476309	0.0448	1.3638	0.0328494
	YML105C	SEC65	0.0191	0.4559	0.0418952	0.0469	2.1535	0.0217785
	YPL209C	IPL1	0.0191	0.4705	0.0405951	0.0566	0.8832	0.0640851
	YNL065W	AQR1	0.0191	0.302	0.063245	0.0577	1.1377	0.0507164
	YKL140W	TGL1	0.0191	0.5033	0.0379495	0.0742	1.2318	0.0602371
	YIL136W	OM45	0.0191	0.2715	0.0703499	0.0742	1.3812	0.0537214
	YIL011W	TIR3	0.0191	0.369	0.0517615	0.1616	0.7058	0.22896
	YBR198C	TAF5	0.0192	0.3748	0.0512273	0.0372	1.3292	0.0279868
	YER118C	SHO1	0.0192	0.4301	0.0446408	0.0402	1.0932	0.0367728
	YER042W	MXR1	0.0192	0.5978	0.0321178	0.0511	1.3369	0.0382228
	YLR305C	STT4	0.0192	0.3743	0.0512958	0.0681	1.0022	0.0679505
	YDR508C	GNP1	0.0192	0.4677	0.041052	0.0686	1.3854	0.0495164
	YMR200W	ROT1	0.0192	0.3201	0.0599813	0.0688	0.9402	0.0731759
	YOR323C	PRO2	0.0192	0.3978	0.0482655	0.0689	2.0995	0.0328173
	YMR102C		0.0192	0.4298	0.0446719	0.0798	1.1874	0.0672057
	YHR142W	CHS7	0.0193	0.3239	0.0595863	0.0433	0.9864	0.043897
	YKL150W	MCR1	0.0193	0.3407	0.0566481	0.0496	1.155	0.0429437
	YHR179W	OYE2	0.0193	0.2552	0.075627	0.0517	0.6876	0.0751891
	YPL260W		0.0193	0.2903	0.0664829	0.0577	1.1937	0.0483371
	YBR091C	MRS5	0.0193	0.3858	0.0500259	0.0805	1.394	0.0577475
	YBR040W	FIG1	0.0193	0.4219	0.0457454	0.0812	1.5708	0.0516934
	YGL056C	SDS23	0.0193	0.3241	0.0595495	0.0847	1.3536	0.0625739
	YMR250W	GAD1	0.0193	0.5055	0.03818	0.0884	1.318	0.0670713
	YAL040C	CLN3	0.0193	0.211	0.0914692	0.0885	0.8142	0.108696
	YPL079W	RPL21B	0.0194	0.0662	0.293051	0.0096	0.1296	0.0740741
	YLR093C	NYV1	0.0194	0.2882	0.0673144	0.0276	0.974	0.0283368
	YDL110C	TMA17	0.0194	0.3313	0.0585572	0.04	1.6663	0.0240053
	YPL134C	ODC1	0.0194	0.3494	0.0555238	0.0443	1.1307	0.0391793
	YDR234W	LYS4	0.0194	0.2938	0.0660313	0.0456	1.7518	0.0260304
	YKL059C	MPE1	0.0194	0.4159	0.0466458	0.0543	1.4956	0.0363065
	YNR007C	ATG3	0.0194	0.4062	0.0477597	0.063	1.0533	0.059812
	YER016W	BIM1	0.0194	0.3236	0.0599506	0.1172	1.5199	0.0771103
	YGL121C	GPG1	0.0194	0.2731	0.0710363	0.1275	1.1393	0.111911
	YCL001W	RER1	0.0195	0.3045	0.0640394	0.0379	0.8186	0.0462986
	YOR388C	FDH1	0.0195	0.2799	0.0696677	0.0385	1.1314	0.0340286
	YNR035C	ARC35	0.0195	0.3323	0.0586819	0.046	0.7811	0.0588913
	YFR001W	LOC1	0.0195	0.4597	0.042419	0.0594	1.0406	0.0570825
	YLL038C	ENT4	0.0195	0.2976	0.0655242	0.0601	1.3782	0.0436076
	YMR237W	BCH1	0.0196	0.3208	0.0610973	0.0437	0.9234	0.0473251
	YMR238W	DFG5	0.0196	0.3615	0.0542185	0.0507	1.1401	0.0444698
	YML115C	VAN1	0.0196	0.2718	0.0721118	0.0561	0.9033	0.0621056
	YPR190C	RPC82	0.0196	0.3707	0.0528729	0.07	0.8783	0.0796994
	YOR168W	GLN4	0.0197	0.3929	0.05014	0.0321	1.742	0.0184271
	YOR229W	WTM2	0.0197	0.3609	0.0545858	0.0453	2.0959	0.0216136
	YGR220C	MRPL9	0.0197	0.6366	0.0309456	0.0568	1.756	0.0323462
	YML128C	MSC1	0.0197	0.3356	0.0587008	0.0577	1.0859	0.0531356
	YDR434W	GPI17	0.0197	0.3795	0.0519104	0.0592	1.1894	0.049773
	YHR046C	INM1	0.0197	0.3525	0.0558865	0.0654	2.0288	0.0322358
	YKL081W	TEF4	0.0197	0.2354	0.0836873	0.0816	1.1374	0.0717426
	YML057W	CMP2	0.0198	0.3018	0.0656064	0.0357	1.1795	0.0302671
	YGR103W	NOP7	0.0198	0.4249	0.0465992	0.0536	0.7158	0.0748813
	YML123C	PHO84	0.0198	0.1011	0.195846	0.0574	0.9207	0.0623439
	YLR262C-A	TMA7	0.0199	0.1807	0.110127	0.0296	0.5753	0.0514514
	YPL135W	ISU1	0.0199	0.3288	0.0605231	0.0307	1.5021	0.0204381
	YML086C	ALO1	0.0199	0.3495	0.0569385	0.0343	2.4159	0.0141976
	YBR202W	MCM7	0.0199	0.3911	0.0508821	0.0365	1.4482	0.0252037
	YNR012W	URK1	0.0199	0.3697	0.0538274	0.0469	1.1748	0.0399217
	YEL015W	EDC3	0.0199	0.35	0.0568571	0.0498	1.3845	0.0359697
	YOR246C		0.0199	0.2733	0.0728138	0.0506	0.997	0.0507523
	YPL147W	PXA1	0.0199	0.3976	0.0500503	0.0517	1.6235	0.0318448
	YHR147C	MRPL6	0.0199	0.3203	0.0621293	0.0625	1.1126	0.0561747
	YLR170C	APS1	0.02	0.2514	0.0795545	0.0381	0.6855	0.0555799
	YPL125W	KAP120	0.02	0.3416	0.058548	0.0404	1.2292	0.0328669
	YPL212C	PUS1	0.02	0.37	0.0540541	0.0446	1.7294	0.0257893
	YKL186C	MTR2	0.02	0.3406	0.0587199	0.0495	3.2248	0.0153498
	YKL034W	TUL1	0.02	0.3628	0.0551268	0.0524	1.2677	0.0413347
	YOL147C	PEX11	0.02	0.4596	0.0435161	0.0536	0.7185	0.0745999
	YOR091W	TMA46	0.02	0.3654	0.0547345	0.0588	1.0022	0.0586709
	YFL004W	VTC2	0.02	0.318	0.0628931	0.0675	0.7622	0.0885594
	YOR119C	RIO1	0.02	0.5099	0.0392234	0.0683	1.5822	0.0431677
	YML052W	SUR7	0.02	0.2373	0.0842815	0.0798	0.9066	0.0880212
	YBR114W	RAD16	0.0201	0.3363	0.0597681	0.0526	1.384	0.0380058
	YFR051C	RET2	0.0201	0.3716	0.0540904	0.056	1.1595	0.0482967
	YOR014W	RTS1	0.0201	0.3259	0.0616754	0.0561	3.2352	0.0173405
	YPL184C	MRN1	0.0201	0.4819	0.0417099	0.0611	1.2072	0.050613
	YOL090W	MSH2	0.0202	0.3783	0.0533968	0.0396	1.3515	0.0293008
	YDR298C	ATP5	0.0202	0.3079	0.0656057	0.0428	0.8393	0.0509949
	YHR065C	RRP3	0.0202	0.4768	0.0423658	0.0465	2.8733	0.0161835
	YGR048W	UFD1	0.0202	0.499	0.040481	0.0485	1.1101	0.0436898
	YPL094C	SEC62	0.0202	0.2001	0.10095	0.0539	0.7358	0.0732536
	YOL136C	PFK27	0.0202	0.366	0.0551913	0.0753	1.3011	0.0578741
	YPR026W	ATH1	0.0203	0.3696	0.0549242	0.0516	1.4426	0.0357688
	YNL059C	ARP5	0.0203	0.2796	0.0726037	0.0528	1.2896	0.0409429
	YBL069W	AST1	0.0203	0.3803	0.0533789	0.0541	1.4187	0.0381335
	YLR321C	SFH1	0.0203	0.3825	0.0530719	0.064	0.7654	0.0836164
	YKR003W	OSH6	0.0203	0.2856	0.0710784	0.0682	0.8567	0.0796078
	YML067C	ERV41	0.0203	0.2707	0.0749908	0.0718	1.6072	0.044674
	YKL103C	LAP4	0.0203	0.374	0.0542781	0.1059	2.8983	0.0365387
	YDR127W	ARO1	0.0204	0.364	0.056044	0.0321	1.5192	0.0211295
	YGR264C	MES1	0.0204	0.3478	0.0586544	0.0478	1.0978	0.0435416
	YOL006C	TOP1	0.0204	0.3393	0.0601238	0.0699	0.9672	0.0722705
	YER048W-A	ISD11	0.0204	0.2744	0.074344	0.0771	1.062	0.0725989
	YMR263W	SAP30	0.0204	0.2468	0.082658	0.1256	0.7621	0.164808
	YDL064W	UBC9	0.0205	0.2279	0.0899517	0.0076	0.4827	0.0157448
	YBL056W	PTC3	0.0205	0.2513	0.0815758	0.0518	1.0436	0.0496359
	YCR020C	PET18	0.0205	0.5403	0.0379419	0.1038	1.7844	0.0581708
	YAR035W	YAT1	0.0205	0.5275	0.0388626	0.9221	4.3537	0.211797
	YIR008C	PRI1	0.0206	0.3352	0.0614558	0.0472	0.6569	0.0718526
	YNL102W	POL1	0.0206	0.4077	0.0505273	0.0655	1.7963	0.0364638
	YPL169C	MEX67	0.0207	0.3192	0.0648496	0.0444	2.0824	0.0213216
	YER164W	CHD1	0.0207	0.3184	0.0650126	0.0525	1.2048	0.0435757
	YBR281C	DUG2	0.0207	0.3866	0.0535437	0.0527	1.0852	0.0485625
	YLL040C	VPS13	0.0207	0.3887	0.0532544	0.0616	1.4383	0.0428283
	YOL103W	ITR2	0.0207	0.4483	0.0461744	0.0632	1.2579	0.0502425
	YER146W	LSM5	0.0208	0.3908	0.0532242	0.0358	0.6158	0.0581358
	YER055C	HIS1	0.0208	0.4615	0.0450704	0.0413	1.953	0.021147
	YOR184W	SER1	0.0208	0.3754	0.0554076	0.0421	1.328	0.0317018
	YFR037C	RSC8	0.0208	0.3175	0.0655118	0.0482	1.1757	0.0409969
	YER017C	AFG3	0.0208	0.4059	0.0512441	0.0585	1.1232	0.0520833
	YDR487C	RIB3	0.0209	0.3557	0.0587574	0.0175	1.2451	0.0140551
	YDR237W	MRPL7	0.0209	0.3861	0.0541311	0.0393	1.2056	0.0325979
	YDR120C	TRM1	0.0209	0.4106	0.0509011	0.051	1.1424	0.0446429
	YOR175C	ALE1	0.0209	0.3308	0.0631802	0.0597	1.1796	0.0506104
	YKL130C	SHE2	0.0209	0.4714	0.044336	0.0736	0.7481	0.0983826
	YOR347C	PYK2	0.021	0.3785	0.0554822	0.0482	1.6992	0.0283663
	YBR254C	TRS20	0.021	0.5159	0.0407056	0.0559	1.5598	0.0358379
	YOR351C	MEK1	0.021	0.4833	0.0434513	0.056	1.3809	0.0405533
	YJL081C	ARP4	0.021	0.4285	0.0490082	0.0579	2.0769	0.0278781
	YBR183W	YPC1	0.021	0.3988	0.052658	0.0649	0.9055	0.0716731
	YNR058W	BIO3	0.021	0.384	0.0546875	0.0872	2.2233	0.039221
	YNL036W	NCE103	0.0211	0.3883	0.0543394	0.04	1.2086	0.0330961
	YOR212W	STE4	0.0211	0.418	0.0504785	0.0462	1.1148	0.0414424
	YDR211W	GCD6	0.0211	0.3975	0.0530818	0.0502	4.9586	0.0101238
	YJR143C	PMT4	0.0211	0.3016	0.0699602	0.054	0.8763	0.0616227
	YNL168C	FMP41	0.0211	0.3302	0.0639007	0.0554	1.3523	0.0409672
	YGR078C	PAC10	0.0211	0.5066	0.0416502	0.0591	1.9013	0.031084
	YER122C	GLO3	0.0211	0.3336	0.0632494	0.0619	3.2937	0.0187935
	YER039C	HVG1	0.0211	0.4038	0.0522536	0.0658	1.1951	0.0550582
	YNR057C	BIO4	0.0211	0.1261	0.167328	0.082	0.3619	0.226582
	YDL178W	DLD2	0.0212	0.3245	0.0653313	0.0408	1.0893	0.0374552
	YML094W	GIM5	0.0212	0.3359	0.063114	0.0429	1.0698	0.040101
	YBR208C	DUR1,2	0.0212	0.3676	0.0576714	0.0523	1.5024	0.034811
	YDL021W	GPM2	0.0212	0.3596	0.0589544	0.0558	0.9569	0.0583133
	YBL037W	APL3	0.0212	0.416	0.0509615	0.0598	0.9976	0.0599439
	YDL170W	UGA3	0.0212	0.2624	0.0807927	0.08	1.1938	0.0670129
	YLR066W	SPC3	0.0212	0.3276	0.0647131	0.0813	0.7642	0.106386
	YCL038C	ATG22	0.0212	0.3	0.0706667	0.0865	0.8778	0.0985418
	YNL263C	YIF1	0.0213	0.3653	0.0583082	0.0433	1.491	0.0290409
	YOL032W	OPI10	0.0213	0.2905	0.0733219	0.0445	1.2879	0.0345524
	YOR100C	CRC1	0.0213	0.252	0.0845238	0.0526	1.0485	0.0501669
	YPR119W	CLB2	0.0213	0.3533	0.0602887	0.0657	1.27	0.0517323
	YCL029C	BIK1	0.0213	0.3287	0.0648007	0.0743	1.3262	0.0560247
	YMR043W	MCM1	0.0214	0.2637	0.0811528	0.0353	1.0024	0.0352155
	YDR368W	YPR1	0.0214	0.4861	0.0440239	0.0363	1.1148	0.0325619
	YNL202W	SPS19	0.0214	0.4724	0.0453006	0.0471	1.7229	0.0273376
	YOR176W	HEM15	0.0214	0.4187	0.0511106	0.0477	1.1848	0.04026
	YMR150C	IMP1	0.0214	0.4176	0.0512452	0.0536	1.2976	0.041307
	YBR248C	HIS7	0.0214	0.406	0.0527094	0.0546	1.588	0.0343829
	YDR408C	ADE8	0.0214	0.2993	0.0715002	0.0563	1.2793	0.0440084
	YDR100W	TVP15	0.0214	0.2319	0.0922812	0.0679	1.2196	0.055674
	YOR317W	FAA1	0.0214	0.3584	0.0597098	0.0765	0.9912	0.0771792
	YMR116C	ASC1	0.0215	0.211	0.101896	0.0202	0.2485	0.0812877
	YHR002W	LEU5	0.0215	0.2426	0.0886232	0.0436	1.1983	0.0363849
	YLR350W	ORM2	0.0215	0.3428	0.0627188	0.047	1.315	0.0357414
	YJR040W	GEF1	0.0215	0.4344	0.0494936	0.0532	1.1319	0.0470006
	YDL174C	DLD1	0.0215	0.3654	0.0588396	0.0538	2.0125	0.0267329
	YJL005W	CYR1	0.0215	0.3912	0.0549591	0.0541	1.6456	0.0328755
	YNL289W	PCL1	0.0215	0.2867	0.0749913	0.0572	1.0734	0.0532886
	YFL036W	RPO41	0.0215	0.4147	0.0518447	0.0616	1.8254	0.033746
	YPL221W	FLC1	0.0215	0.3603	0.0596725	0.0625	1.2227	0.0511164
	YOR344C	TYE7	0.0215	0.2628	0.0818113	0.063	0.8933	0.070525
	YDR006C	SOK1	0.0215	0.2963	0.0725616	0.072	0.9054	0.0795229
	YJL094C	KHA1	0.0215	0.4373	0.0491653	0.0844	1.9817	0.0425897
	YPL042C	SSN3	0.0216	0.3676	0.0587595	0.0198	3.1976	0.00619214
	YBR017C	KAP104	0.0216	0.2955	0.0730964	0.0385	0.944	0.0407839
	YPL128C	TBF1	0.0216	0.31	0.0696774	0.0416	1.3819	0.0301035
	YDL166C	FAP7	0.0216	0.3403	0.0634734	0.0442	1.2789	0.034561
	YBL091C	MAP2	0.0216	0.4199	0.0514408	0.046	2.0022	0.0229747
	YDR457W	TOM1	0.0216	0.4027	0.0536379	0.0472	1.2	0.0393333
	YPR037C	ERV2	0.0216	0.9463	0.0228257	0.0746	3.5511	0.0210076
	YPL069C	BTS1	0.0216	0.2191	0.0985851	0.0868	0.7216	0.120288
	YGL256W	ADH4	0.0216	0.1517	0.142386	0.0955	0.6477	0.147445
	YER082C	UTP7	0.0217	0.3415	0.0635432	0.0417	1.4124	0.0295242
	YDR101C	ARX1	0.0217	0.3791	0.0572408	0.048	0.8741	0.0549136
	YLR384C	IKI3	0.0217	0.3191	0.0680038	0.0497	0.9223	0.053887
	YJR005W	APL1	0.0217	0.347	0.062536	0.0501	1.4581	0.0343598
	YBR094W	PBY1	0.0217	0.2632	0.0824468	0.064	1.1272	0.0567779
	YDL236W	PHO13	0.0217	0.4906	0.0442316	0.0644	0.9409	0.0684451
	YDL085W	NDE2	0.0217	0.3479	0.0623742	0.072	1.1433	0.0629756
	YHR189W	PTH1	0.0217	0.353	0.0614731	0.0807	1.3306	0.0606493
	YDR300C	PRO1	0.0218	0.4173	0.0522406	0.0489	1.2968	0.0377082
	YEL022W	GEA2	0.0218	0.3004	0.0725699	0.0524	1.1035	0.0474853
	YBR260C	RGD1	0.0218	0.3774	0.0577636	0.0592	1.0634	0.0556705
	YOL081W	IRA2	0.0218	0.4388	0.0496809	0.0619	2.0875	0.0296527
	YJR082C	EAF6	0.0218	0.2595	0.0840077	0.0732	1.0222	0.0716103
	YOR115C	TRS33	0.0218	0.3145	0.0693164	0.0764	0.9393	0.0813372
	YNL084C	END3	0.0218	0.4828	0.0451533	0.0932	0.6102	0.152737
	YHR199C	FMP34	0.0218	0.4961	0.0439428	0.0998	1.5302	0.0652202
	YHR165C	PRP8	0.0219	0.3727	0.0587604	0.0245	1.3595	0.0180213
	YBR111C	YSA1	0.0219	0.4065	0.0538745	0.0345	1.5673	0.0220124
	YLL034C	RIX7	0.0219	0.3661	0.0598197	0.0441	2.2386	0.0196998
	YOR254C	SEC63	0.0219	0.3939	0.0555979	0.063	1.4261	0.0441764
	YKL183W	LOT5	0.0219	0.2534	0.0864246	0.0735	0.758	0.0969657
	YJR153W	PGU1	0.0219	0.493	0.0444219	0.0747	1.5645	0.0477469
	YLR209C	PNP1	0.022	0.4732	0.046492	0.0433	1.1017	0.0393029
	YDL078C	MDH3	0.022	0.2809	0.0783197	0.0461	1.1122	0.0414494
	YCR077C	PAT1	0.022	0.3462	0.0635471	0.0514	0.9638	0.0533306
	YBR235W		0.022	0.4056	0.0542406	0.0522	2.5622	0.0203731
	YJR069C	HAM1	0.022	0.414	0.0531401	0.0536	0.9883	0.0542345
	YPL116W	HOS3	0.022	0.319	0.0689655	0.0565	1.2985	0.0435117
	YGL248W	PDE1	0.022	0.3108	0.0707851	0.0927	1.0917	0.0849134
	YMR061W	RNA14	0.0221	0.2646	0.0835223	0.0529	0.7128	0.0742144
	YNL097C	PHO23	0.0221	0.3457	0.0639283	0.0995	1.96	0.0507653
	YFR002W	NIC96	0.0222	0.3386	0.0655641	0.0489	1.2358	0.0395695
	YHR058C	MED6	0.0222	0.4046	0.054869	0.0537	2.3145	0.0232016
	YDL015C	TSC13	0.0222	0.2069	0.107298	0.0549	0.7392	0.0742695
	YOR237W	HES1	0.0222	0.3853	0.0576174	0.06	1.1758	0.0510291
	YEL052W	AFG1	0.0222	0.3465	0.0640693	0.0628	1.4888	0.0421816
	YMR286W	MRPL33	0.0222	0.4478	0.0495757	0.0664	0.7475	0.0888294
	YPL076W	GPI2	0.0222	0.2785	0.0797127	0.0711	0.6709	0.105977
	YBR166C	TYR1	0.0222	0.4484	0.0495094	0.0787	1.089	0.0722681
	YBR282W	MRPL27	0.0223	0.5776	0.038608	0.0478	2.5196	0.0189713
	YDR245W	MNN10	0.0223	0.4469	0.0498993	0.0613	0.8998	0.0681263
	YFL026W	STE2	0.0223	0.4289	0.0519935	0.0623	1.2401	0.0502379
	YLR226W	BUR2	0.0223	0.2909	0.0766586	0.0787	0.801	0.0982522
	YIR009W	MSL1	0.0223	0.2317	0.0962451	0.0803	0.5746	0.139749
	YBR129C	OPY1	0.0223	0.3868	0.0576525	0.0833	1.0951	0.0760661
	YNL032W	SIW14	0.0223	0.3659	0.0609456	0.0916	1.6283	0.056255
	YPL188W	POS5	0.0224	0.4406	0.0508398	0.0496	1.0462	0.0474097
	YGL139W	FLC3	0.0224	0.3478	0.0644048	0.061	0.9639	0.0632846
	YOR380W	RDR1	0.0224	0.3235	0.0692427	0.0936	1.1211	0.0834894
	YGR145W	ENP2	0.0225	0.3893	0.057796	0.0393	1.2949	0.0303498
	YKL016C	ATP7	0.0225	0.3405	0.0660793	0.0442	0.664	0.0665663
	YBL020W	RFT1	0.0225	0.349	0.0644699	0.0451	1.0639	0.0423912
	YJR075W	HOC1	0.0225	0.3396	0.0662544	0.0599	1.1086	0.0540321
	YPR072W	NOT5	0.0225	0.2956	0.0761164	0.0628	1.6984	0.036976
	YOR047C	STD1	0.0225	0.48	0.046875	0.1116	1.3225	0.0843856
	YAL013W	DEP1	0.0225	0.2805	0.0802139	1.1306	1.8566	0.608963
	YMR306W	FKS3	0.0226	0.3883	0.0582024	0.0463	0.9803	0.0472304
	YFL008W	SMC1	0.0226	0.3541	0.0638238	0.0591	1.3352	0.044263
	YJR091C	JSN1	0.0226	0.3703	0.0610316	0.0636	1.2688	0.0501261
	YBR101C	FES1	0.0226	0.2601	0.0868897	0.0683	1.5656	0.0436254
	YER019W	ISC1	0.0226	0.4558	0.0495832	0.0685	1.8011	0.0380323
	YOL148C	SPT20	0.0226	0.2834	0.0797459	0.0738	1.5825	0.0466351
	YER151C	UBP3	0.0226	0.4658	0.0485187	0.1133	1.9284	0.0587534
	YOR125C	CAT5	0.0227	0.3514	0.0645987	0.0529	1.0736	0.0492735
	YAL044C	GCV3	0.0227	0.226	0.100442	0.0564	1.298	0.0434515
	YAL033W	POP5	0.0227	0.236	0.0961864	0.0579	1.1251	0.0514621
	YER024W	YAT2	0.0227	0.3654	0.0621237	0.0629	1.2729	0.0494147
	YEL065W	SIT1	0.0227	0.373	0.0608579	0.0711	1.0436	0.0681296
	YBR024W	SCO2	0.0227	0.3482	0.0651924	0.1251	1.3615	0.091884
	YKL114C	APN1	0.0228	0.393	0.0580153	0.051	1.672	0.0305024
	YER093C	TSC11	0.0228	0.3541	0.0643886	0.0587	1.1099	0.0528876
	YBR102C	EXO84	0.0228	0.4109	0.055488	0.068	1.2992	0.0523399
	YBR016W		0.0229	0.4894	0.046792	0.0545	0.6986	0.0780132
	YNL207W	RIO2	0.0229	0.392	0.0584184	0.0576	1.2218	0.0471436
	YKR089C	TGL4	0.0229	0.4007	0.05715	0.0662	1.085	0.0610138
	YGL150C	INO80	0.0229	0.4512	0.0507535	0.0712	1.1888	0.0598923
	YPL219W	PCL8	0.0229	0.3227	0.0709637	0.085	1.0332	0.0822687
	YJR024C	MDE1	0.0229	0.345	0.0663768	0.9104	1.5496	0.587506
	YKL165C	MCD4	0.023	0.3882	0.0592478	0.0453	1.1038	0.04104
	YGL012W	ERG4	0.023	0.3376	0.068128	0.0516	0.8903	0.057958
	YGL068W	MNP1	0.023	0.2204	0.104356	0.0594	0.6163	0.0963816
	YKL125W	RRN3	0.023	0.2733	0.0841566	0.062	0.5565	0.111411
	YGR233C	PHO81	0.023	0.4073	0.0564694	0.0725	1.1636	0.0623066
	YGR271W	SLH1	0.0231	0.4742	0.0487136	0.0473	2.0054	0.0235863
	YLL004W	ORC3	0.0231	0.3621	0.0637945	0.06	0.9884	0.0607042
	YGR097W	ASK10	0.0231	0.4205	0.0549346	0.0667	1.3986	0.0476905
	YLR237W	THI7	0.0231	0.3425	0.0674453	0.0805	1.2108	0.066485
	YML056C	IMD4	0.0232	0.3269	0.0709697	0.0485	0.5818	0.083362
	YBR068C	BAP2	0.0232	0.3834	0.0605112	0.0561	1.7489	0.0320773
	YBR175W	SWD3	0.0232	0.3171	0.073163	0.0579	1.067	0.0542643
	YGR257C	MTM1	0.0232	0.3696	0.0627706	0.0701	1.8975	0.0369433
	YMR063W	RIM9	0.0232	0.3574	0.0649133	0.0842	0.7774	0.10831
	YMR194W	RPL36A	0.0233	0.1459	0.159698	0.0115	0.1507	0.0763106
	YJL106W	IME2	0.0233	0.4473	0.0520903	0.0471	1.2537	0.0375688
	YBR062C		0.0233	0.2782	0.0837527	0.0544	0.9387	0.0579525
	YER027C	GAL83	0.0233	0.3169	0.0735248	0.0723	1.0281	0.0703239
	YER112W	LSM4	0.0233	0.2138	0.10898	0.0901	0.5099	0.176701
	YGR123C	PPT1	0.0234	0.4151	0.056372	0.0517	1.4218	0.0363624
	YHR092C	HXT4	0.0234	0.4149	0.0563991	0.0527	0.8319	0.063349
	YER161C	SPT2	0.0234	0.4091	0.0571987	0.088	1.2564	0.0700414
	YDL168W	SFA1	0.0235	0.4782	0.0491426	0.033	1.7264	0.0191149
	YJR044C	VPS55	0.0235	0.2442	0.0962326	0.0354	0.8156	0.0434036
	YHR001W	OSH7	0.0235	0.2909	0.0807838	0.0497	1.1435	0.0434631
	YPR058W	YMC1	0.0235	0.3255	0.0721966	0.0532	0.8984	0.0592164
	YMR223W	UBP8	0.0235	0.3334	0.0704859	0.0554	0.8517	0.0650464
	YHR062C	RPP1	0.0235	0.2427	0.0968274	0.0565	1.1071	0.0510342
	YDR389W	SAC7	0.0235	0.3442	0.0682743	0.0582	1.5751	0.03695
	YMR181C		0.0235	0.1877	0.1252	0.0598	0.8311	0.0719528
	YKL141W	SDH3	0.0235	0.3	0.0783333	0.0647	1.004	0.0644422
	YLR195C	NMT1	0.0236	0.3027	0.077965	0.0357	1.2609	0.0283131
	YOR211C	MGM1	0.0236	0.4767	0.049507	0.0424	1.1836	0.0358229
	YEL050C	RML2	0.0236	0.2956	0.0798376	0.0489	0.8847	0.055273
	YPL060W	LPE10	0.0236	0.3967	0.0594908	0.054	2.0319	0.0265761
	YGR243W	FMP43	0.0236	0.5622	0.0419779	0.0609	1.3395	0.0454647
	YNL199C	GCR2	0.0236	0.3781	0.0624173	0.0619	1.3597	0.0455247
	YBL045C	COR1	0.0236	0.3389	0.0696371	0.0629	1.8823	0.0334166
	YGR280C	PXR1	0.0236	0.3687	0.0640087	0.063	1.1466	0.0549451
	YPR140W	TAZ1	0.0236	0.3194	0.0738885	0.0664	2.0765	0.0319769
	YIL013C	PDR11	0.0236	0.3265	0.0722818	0.0667	1.1962	0.0557599
	YBR146W	MRPS9	0.0237	0.3038	0.0780118	0.052	0.714	0.0728291
	YJL104W	PAM16	0.0237	0.3432	0.0690559	0.0545	1.0941	0.0498126
	YOR221C	MCT1	0.0237	0.3363	0.0704728	0.0554	0.9513	0.0582361
	YNL231C	PDR16	0.0237	0.2859	0.0828961	0.0588	1.1653	0.0504591
	YFL024C	EPL1	0.0237	0.3433	0.0690358	0.0605	1.2601	0.0480121
	YLR352W		0.0237	0.3838	0.0617509	0.0634	1.1285	0.0561808
	YER040W	GLN3	0.0237	0.2732	0.0867496	0.0938	0.9912	0.0946328
	YGR161C	RTS3	0.0237	0.3184	0.0744347	0.1966	1.5798	0.124446
	YPR108W	RPN7	0.0238	0.3253	0.0731632	0.0439	0.9383	0.0467867
	YLR277C	YSH1	0.0238	0.3688	0.0645336	0.0591	1.551	0.0381044
	YIL126W	STH1	0.0238	0.348	0.0683908	0.0606	1.3424	0.045143
	YNL156C	NSG2	0.0238	0.3074	0.0774236	0.073	1.7447	0.041841
	YOR321W	PMT3	0.0238	0.3568	0.066704	0.0942	1.1822	0.0796819
	YDR116C	MRPL1	0.0238	0.541	0.0439926	0.0983	1.5424	0.0637318
	YPL026C	SKS1	0.0239	0.4417	0.0541091	0.055	1.0235	0.0537372
	YBR001C	NTH2	0.0239	0.4484	0.0533006	0.06	2.3461	0.0255744
	YPL256C	CLN2	0.0239	0.3511	0.0680718	0.0666	1.4	0.0475714
	YMR212C	EFR3	0.0239	0.355	0.0673239	0.0695	0.8441	0.0823362
	YCL011C	GBP2	0.024	0.3169	0.0757337	0.0485	0.7599	0.0638242
	YJL201W	ECM25	0.024	0.2898	0.0828157	0.0713	1.0366	0.0687826
	YDL193W	NUS1	0.024	0.2654	0.0904295	0.0783	0.6848	0.11434
	YNL305C		0.0241	0.4566	0.0527814	0.0362	0.8644	0.0418788
	YJR017C	ESS1	0.0241	0.3238	0.0744287	0.0523	1.6694	0.0313286
	YOR011W	AUS1	0.0241	0.3248	0.0741995	0.0533	0.8425	0.0632641
	YAL019W	FUN30	0.0241	0.3148	0.0765565	0.0613	1.1685	0.0524604
	YOR360C	PDE2	0.0241	0.24	0.100417	0.0867	0.7936	0.109249
	YCR008W	SAT4	0.0242	0.4119	0.0587521	0.0611	1.5126	0.040394
	YAL035W	FUN12	0.0242	0.3188	0.0759097	0.0641	0.7052	0.0908962
	YOR085W	OST3	0.0242	0.3101	0.0780393	0.0745	1.1861	0.0628109
	YBR140C	IRA1	0.0242	0.4159	0.0581871	0.0839	1.5747	0.05328
	YGL219C	MDM34	0.0242	0.3561	0.0679584	0.1083	0.9794	0.110578
	YBR087W	RFC5	0.0243	0.3892	0.0624358	0.0506	1.4325	0.0353229
	YNL071W	LAT1	0.0243	0.2745	0.0885246	0.0545	0.9166	0.0594589
	YNR008W	LRO1	0.0243	0.2797	0.0868788	0.0615	1.5696	0.039182
	YPL077C		0.0243	0.6742	0.0360427	0.0635	1.5448	0.0411056
	YHR063C	PAN5	0.0243	0.3383	0.0718297	0.0926	1.7497	0.0529234
	YOL001W	PHO80	0.0243	0.3467	0.0700894	0.0952	1.1928	0.0798122
	YMR266W	RSN1	0.0243	0.3562	0.0682201	0.1187	1.2009	0.0988425
	YPL270W	MDL2	0.0244	0.4563	0.0534736	0.0579	1.6449	0.0351997
	YCR093W	CDC39	0.0244	0.3712	0.0657328	0.061	0.9488	0.0642917
	YKL106W	AAT1	0.0244	0.3021	0.080768	0.0728	0.9876	0.0737141
	YNL129W	NRK1	0.0244	0.2665	0.0915572	0.086	0.9737	0.0883229
	YHR137W	ARO9	0.0244	0.3799	0.0642274	0.0948	1.4403	0.0658196
	YPL170W	DAP1	0.0245	0.3315	0.0739065	0.0401	3.4345	0.0116756
	YDL101C	DUN1	0.0245	0.2775	0.0882883	0.0574	1.3257	0.0432979
	YFL047W	RGD2	0.0245	0.344	0.0712209	0.0608	1.0465	0.0580984
	YLR389C	STE23	0.0245	0.3406	0.0719319	0.0721	1.4882	0.0484478
	YIL131C	FKH1	0.0245	0.3378	0.0725281	0.0893	1.0336	0.0863971
	YPL223C	GRE1	0.0245	0.4984	0.0491573	0.1391	1.595	0.08721
	YGR152C	RSR1	0.0246	0.2691	0.0914158	0.0384	1.5602	0.0246122
	YPL153C	RAD53	0.0246	0.408	0.0602941	0.0513	1.6157	0.0317509
	YGR281W	YOR1	0.0246	0.4788	0.0513784	0.0558	1.1212	0.0497681
	YBR145W	ADH5	0.0246	0.4223	0.0582524	0.0576	1.8363	0.0313674
	YDR202C	RAV2	0.0246	0.4807	0.0511754	0.0625	1.3891	0.0449932
	YLR372W	SUR4	0.0246	0.1862	0.132116	0.0636	0.5401	0.117756
	YPR040W	TIP41	0.0246	0.3414	0.0720562	0.0855	2.2631	0.03778
	YGR024C	THG1	0.0247	0.2152	0.114777	0.038	1.937	0.019618
	YGR227W	DIE2	0.0247	0.2632	0.093845	0.062	0.8794	0.0705026
	YLR052W	IES3	0.0247	0.2867	0.0861528	0.0803	0.8866	0.0905707
	YAL034C	FUN19	0.0247	0.3396	0.0727326	0.0936	0.733	0.127694
	YML010W	SPT5	0.0248	0.3692	0.0671723	0.0099	1.4844	0.00666936
	YLR276C	DBP9	0.0248	0.3048	0.0813648	0.0388	1.0208	0.0380094
	YLR409C	UTP21	0.0248	0.3699	0.0670451	0.0451	1.3226	0.0340995
	YJR103W	URA8	0.0248	0.3893	0.0637041	0.0564	1.2085	0.0466694
	YOL068C	HST1	0.0248	0.3847	0.0644658	0.0598	1.0622	0.0562982
	YGL180W	ATG1	0.0248	0.4069	0.0609486	0.0601	1.3642	0.0440551
	YNL219C	ALG9	0.0248	0.3331	0.0744521	0.0613	1.0544	0.0581373
	YOL011W	PLB3	0.0248	0.3983	0.0622646	0.0616	1.0302	0.0597942
	YHR106W	TRR2	0.0248	0.337	0.0735905	0.0642	2.6869	0.0238937
	YJL116C	NCA3	0.0248	0.3381	0.0733511	0.0751	3.3271	0.0225722
	YOL121C	RPS19A	0.0249	0.1273	0.195601	0.031	0.3358	0.0923169
	YIL070C	MAM33	0.0249	0.492	0.0506098	0.0319	1.1171	0.0285561
	YGL205W	POX1	0.0249	0.4347	0.0572809	0.0454	1.1642	0.0389967
	YOR261C	RPN8	0.0249	0.2786	0.0893754	0.0459	0.8214	0.0558802
	YKL174C	TPO5	0.0249	0.3884	0.0641092	0.0547	1.177	0.0464741
	YGL029W	CGR1	0.0249	0.187	0.133155	0.0656	1.3288	0.0493679
	YNL157W	IGO1	0.0249	0.4767	0.0522341	0.0748	0.7828	0.0955544
	YDL164C	CDC9	0.0249	0.4237	0.058768	0.0838	1.9289	0.0434445
	YJL128C	PBS2	0.025	0.3273	0.0763825	0.0572	1.0325	0.0553995
	YIL107C	PFK26	0.025	0.3962	0.0630994	0.0598	1.4376	0.0415971
	YFL059W	SNZ3	0.025	0.4275	0.0584795	0.0637	1.2562	0.0507085
	YOR092W	ECM3	0.025	0.3834	0.0652061	0.0751	0.9007	0.0833796
	YOL145C	CTR9	0.025	0.4229	0.0591156	0.0766	1.1549	0.0663261
	YIL088C	AVT7	0.025	0.4206	0.0594389	0.0807	1.353	0.0596452
	YDL052C	SLC1	0.025	0.1658	0.150784	0.1003	0.7305	0.137303
	YPR054W	SMK1	0.0251	0.268	0.0936567	0.0506	1.3645	0.0370832
	YNL192W	CHS1	0.0251	0.4385	0.0572406	0.064	2.4229	0.0264146
	YJL053W	PEP8	0.0251	0.4444	0.0564806	0.0706	1.4343	0.0492226
	YNL293W	MSB3	0.0251	0.2965	0.0846543	0.0761	1.2573	0.0605265
	YBR110W	ALG1	0.0251	0.4388	0.0572015	0.0772	1.1203	0.0689101
	YCL028W	RNQ1	0.0251	0.256	0.0980469	0.0945	1.0891	0.0867689
	YNR064C		0.0251	0.2345	0.107036	0.1338	2.3893	0.0559997
	YKL067W	YNK1	0.0252	0.3736	0.0674518	0.0382	3.1778	0.0120209
	YER068W	MOT2	0.0252	0.3753	0.0671463	0.0527	1.1349	0.0464358
	YDR233C	RTN1	0.0252	0.2569	0.0980926	0.0558	0.7451	0.0748893
	YCR086W	CSM1	0.0252	0.2432	0.103618	0.0592	1.0774	0.0549471
	YLL057C	JLP1	0.0252	0.4063	0.0620231	0.0915	1.8786	0.0487065
	YOR241W	MET7	0.0252	0.3568	0.0706278	0.0942	0.9387	0.100352
	YBR042C	CST26	0.0252	0.4734	0.0532319	0.0949	1.2044	0.0787944
	YBR084W	MIS1	0.0253	0.3361	0.0752752	0.0469	0.8773	0.0534595
	YLR020C	YEH2	0.0253	0.371	0.0681941	0.0746	1.1831	0.0630547
	YFL033C	RIM15	0.0253	0.3421	0.073955	0.0803	1.1806	0.0680163
	YOL154W	ZPS1	0.0253	0.3757	0.067341	0.1084	0.9899	0.109506
	YER073W	ALD5	0.0254	0.3307	0.0768068	0.0463	0.8803	0.0525957
	YNL011C		0.0254	0.4209	0.0603469	0.0536	1.4505	0.0369528
	YKL135C	APL2	0.0254	0.3146	0.0807374	0.0577	1.1502	0.0501652
	YGR046W	TAM41	0.0254	0.4186	0.0606785	0.0677	0.9333	0.0725383
	YBR294W	SUL1	0.0254	0.4673	0.0543548	0.0913	1.1478	0.0795435
	YIL062C	ARC15	0.0255	0.1701	0.149912	0.0457	0.7256	0.0629824
	YDR208W	MSS4	0.0255	0.3501	0.0728363	0.0522	1.1992	0.043529
	YJR090C	GRR1	0.0255	0.3275	0.0778626	0.0552	1.2253	0.0450502
	YDR031W	MIC14	0.0255	0.2222	0.114761	0.0594	0.8987	0.0660955
	YLR196W	PWP1	0.0255	0.3877	0.0657725	0.0608	1.0555	0.057603
	YDL240W	LRG1	0.0255	0.3306	0.0771325	0.0727	1.3655	0.0532406
	YJL184W	GON7	0.0255	0.5137	0.0496399	0.074	1.1311	0.065423
	YDR005C	MAF1	0.0256	0.3857	0.0663728	0.0416	1.4214	0.0292669
	YML130C	ERO1	0.0256	0.2737	0.0935331	0.0667	1.1817	0.0564441
	YDR170C	SEC7	0.0256	0.4187	0.0611416	0.0718	0.8714	0.0823961
	YJL084C	ALY2	0.0256	0.3657	0.0700027	0.0749	1.5061	0.0497311
	YHR082C	KSP1	0.0256	0.375	0.0682667	0.0752	2.3162	0.032467
	YBR233W-A	DAD3	0.0256	0.3611	0.0708945	0.1041	1.2066	0.0862755
	YOL047C		0.0256	0.473	0.0541226	0.1942	1.0171	0.190935
	YBL050W	SEC17	0.0257	0.5949	0.0432005	0.0288	1.5145	0.0190162
	YIL164C	NIT1	0.0257	0.4373	0.0587697	0.0431	1.4566	0.0295895
	YGL122C	NAB2	0.0257	0.9151	0.0280844	0.0548	1.1214	0.0488675
	YGR083C	GCD2	0.0257	0.3835	0.0670143	0.0555	1.2208	0.045462
	YGR217W	CCH1	0.0257	0.3903	0.0658468	0.076	1.5763	0.0482142
	YCL039W	GID7	0.0257	0.3798	0.0676672	0.0809	1.3374	0.0604905
	YJR059W	PTK2	0.0257	0.3312	0.0775966	0.0922	1.3016	0.0708359
	YDR016C	DAD1	0.0257	0.3967	0.0647845	0.0945	1.2301	0.076823
	YDR378C	LSM6	0.0258	0.5985	0.0431078	0.0222	1.3538	0.0163983
	YIL116W	HIS5	0.0258	0.3481	0.0741166	0.0663	2.3717	0.0279546
	YGL233W	SEC15	0.0258	0.2878	0.0896456	0.0669	1.0055	0.0665341
	YDL028C	MPS1	0.0258	0.4136	0.0623791	0.0719	1.6063	0.0447613
	YLR314C	CDC3	0.0258	0.2635	0.0979127	0.0949	0.9219	0.10294
	YLR369W	SSQ1	0.0259	0.5854	0.0442433	0.0483	1.5009	0.0321807
	YBR185C	MBA1	0.0259	0.3176	0.0815491	0.0744	1.6297	0.0456526
	YNL080C	EOS1	0.0259	0.3168	0.0817551	0.0825	0.8842	0.0933047
	YMR215W	GAS3	0.0259	0.4252	0.0609125	0.0845	0.9696	0.0871493
	YPL011C	TAF3	0.0259	0.4525	0.0572376	0.0942	1.0633	0.0885921
	YMR049C	ERB1	0.026	0.2645	0.0982987	0.0356	1.1285	0.0315463
	YDR523C	SPS1	0.026	0.3074	0.0845804	0.0471	0.9324	0.0505148
	YMR301C	ATM1	0.026	0.3601	0.0722022	0.0562	1.5085	0.0372556
	YEL037C	RAD23	0.026	0.3296	0.0788835	0.0637	1.0096	0.0630943
	YDL087C	LUC7	0.026	0.3242	0.0801974	0.0649	0.8465	0.0766686
	YNL267W	PIK1	0.026	0.3607	0.0720821	0.065	2.1007	0.0309421
	YNL261W	ORC5	0.026	0.4096	0.0634766	0.0654	0.9791	0.066796
	YER182W	FMP10	0.026	0.4354	0.0597152	0.0824	1.0855	0.0759097
	YLL015W	BPT1	0.026	0.4237	0.0613642	0.0834	1.5333	0.0543925
	YLR218C		0.026	0.2483	0.104712	0.0876	1.9388	0.0451826
	YHR194W	MDM31	0.0261	0.3666	0.0711948	0.0521	2.8699	0.0181539
	YOL149W	DCP1	0.0261	0.3222	0.0810056	0.0562	0.8542	0.0657926
	YBR026C	ETR1	0.0261	0.3337	0.078214	0.0568	1.181	0.0480948
	YLR421C	RPN13	0.0261	0.5151	0.0506698	0.0572	0.6979	0.0819602
	YOR103C	OST2	0.0261	0.2113	0.123521	0.0631	0.6655	0.0948159
	YJL153C	INO1	0.0261	0.4875	0.0535385	0.0638	1.252	0.0509585
	YJL006C	CTK2	0.0261	0.4591	0.0568504	0.0645	0.9499	0.0679019
	YPR191W	QCR2	0.0261	0.4061	0.0642699	0.0697	0.9224	0.0755637
	YNR049C	MSO1	0.0261	0.325	0.0803077	0.0855	1.0982	0.0778547
	YNR019W	ARE2	0.0261	0.3099	0.0842207	0.0859	1.0565	0.0813062
	YGL143C	MRF1	0.0262	0.3984	0.0657631	0.0561	1.3759	0.0407733
	YFL011W	HXT10	0.0262	0.4196	0.0624404	0.0577	1.2539	0.0460164
	YBR290W	BSD2	0.0262	0.3725	0.0703356	0.0656	1.324	0.0495468
	YNL115C		0.0262	0.4928	0.0531656	0.0785	1.0326	0.0760217
	YMR236W	TAF9	0.0263	0.4436	0.0592876	0.0535	3.0385	0.0176074
	YDL231C	BRE4	0.0263	0.339	0.0775811	0.0702	1.429	0.0491253
	YHL040C	ARN1	0.0263	0.3586	0.0733408	0.077	1.6274	0.0473147
	YER015W	FAA2	0.0263	0.4387	0.0599499	0.0885	1.2521	0.0706813
	YLR398C	SKI2	0.0264	0.3729	0.0707965	0.0504	1.4486	0.0347922
	YFL041W	FET5	0.0264	0.3375	0.0782222	0.0524	1.2606	0.0415675
	YPR184W	GDB1	0.0264	0.3728	0.0708155	0.0603	1.2668	0.0476003
	YKL094W	YJU3	0.0264	0.4006	0.0659011	0.0621	1.5665	0.0396425
	YOL116W	MSN1	0.0264	0.3371	0.078315	0.0727	1.1647	0.0624195
	YJL122W	ALB1	0.0264	0.3405	0.077533	0.0803	0.9833	0.0816638
	YMR035W	IMP2	0.0264	0.3489	0.0756664	0.0839	0.7871	0.106594
	YCL010C	SGF29	0.0264	0.2701	0.0977416	0.09	1.3342	0.0674562
	YGR143W	SKN1	0.0265	0.4774	0.055509	0.0504	1.2958	0.0388949
	YMR170C	ALD2	0.0265	0.4501	0.0588758	0.064	2.0395	0.0313802
	YPL070W	MUK1	0.0265	0.3621	0.0731842	0.0854	1.6204	0.052703
	YJL101C	GSH1	0.0266	0.3004	0.0885486	0.0547	2.0071	0.0272533
	YIR012W	SQT1	0.0266	0.3981	0.0668174	0.0578	0.9785	0.05907
	YMR201C	RAD14	0.0266	0.2715	0.0979742	0.0591	1.1499	0.0513958
	YDR367W		0.0266	0.299	0.0889632	0.0609	2.2407	0.027179
	YLR250W	SSP120	0.0266	0.2583	0.102981	0.0622	1.0015	0.0621068
	YPR073C	LTP1	0.0266	0.3374	0.0788382	0.0694	0.6304	0.110089
	YCL035C	GRX1	0.0266	0.3158	0.0842305	0.0707	2.4323	0.0290671
	YDR443C	SSN2	0.0266	0.388	0.0685567	0.0739	1.4964	0.0493852
	YJL165C	HAL5	0.0266	0.3846	0.0691628	0.076	1.0692	0.0710812
	YLR231C	BNA5	0.0266	0.2855	0.0931699	0.0768	1.2709	0.0604296
	YAL060W	BDH1	0.0266	0.3467	0.0767234	0.0841	1.2433	0.0676426
	YIL121W	QDR2	0.0266	0.4404	0.0603996	0.0855	2.7633	0.0309413
	YHL036W	MUP3	0.0267	0.3681	0.0725346	0.0554	0.9352	0.0592387
	YLR272C	YCS4	0.0267	0.4053	0.0658771	0.0583	1.0774	0.0541118
	YJL213W		0.0267	0.4265	0.0626026	0.0585	1.3162	0.0444461
	YDL031W	DBP10	0.0267	0.4664	0.057247	0.0593	1.0966	0.0540762
	YGL224C	SDT1	0.0267	0.3333	0.080108	0.0616	1.2046	0.0511373
	YLR222C	UTP13	0.0267	0.5172	0.0516241	0.0662	3.8391	0.0172436
	YLR228C	ECM22	0.0267	0.4517	0.05911	0.0803	1.7966	0.0446955
	YPL103C	FMP30	0.0267	0.3948	0.0676292	0.0865	1.6094	0.0537467
	YLR307W	CDA1	0.0267	0.5857	0.0455865	0.0945	2.0963	0.0450794
	YHL018W		0.0267	0.5204	0.0513067	0.1027	1.618	0.0634734
	YOR334W	MRS2	0.0268	0.3752	0.0714286	0.059	2.1305	0.027693
	YFR040W	SAP155	0.0268	0.3685	0.0727273	0.0781	1.2104	0.0645241
	YIL056W	VHR1	0.0268	0.327	0.0819572	0.0785	1.4683	0.0534632
	YML066C	SMA2	0.0268	0.3366	0.0796197	0.0813	1.3563	0.0599425
	YDR400W	URH1	0.0268	0.3758	0.0713145	0.0823	1.2234	0.0672715
	YHL032C	GUT1	0.0269	0.3886	0.0692229	0.0491	1.1346	0.0432752
	YFL007W	BLM10	0.0269	0.3873	0.0694552	0.0568	1.14	0.0498246
	YKR009C	FOX2	0.0269	0.3904	0.0689037	0.0621	2.1564	0.028798
	YNL250W	RAD50	0.0269	0.3888	0.0691872	0.08	1.4051	0.0569354
	YLR324W	PEX30	0.0269	0.3387	0.0794213	0.0821	1.3415	0.0612001
	YOL060C	MAM3	0.0269	0.3767	0.0714096	0.0948	2.1649	0.0437896
	YLR072W		0.0269	0.378	0.071164	0.1128	0.8815	0.127964
	YGL013C	PDR1	0.0269	0.3646	0.0737795	0.1222	1.4921	0.081898
	YHL021C	FMP12	0.027	0.2768	0.0975434	0.0587	3.771	0.0155662
	YGL084C	GUP1	0.027	0.3952	0.0683198	0.0612	1.3657	0.0448122
	YPR176C	BET2	0.027	0.3859	0.0699663	0.0616	1.0871	0.0566645
	YHL014C	YLF2	0.027	0.4837	0.0558197	0.0653	0.9262	0.0705031
	YER029C	SMB1	0.027	0.3537	0.0763359	0.0703	1.5969	0.0440228
	YNL130C	CPT1	0.027	0.2875	0.093913	0.0952	1.1933	0.0797788
	YMR091C	NPL6	0.0271	0.3299	0.0821461	0.0496	1.3291	0.0373185
	YGL171W	ROK1	0.0271	0.3924	0.0690622	0.0536	0.9486	0.0565043
	YLR459W	GAB1	0.0271	0.1827	0.148331	0.0645	0.9249	0.0697373
	YMR288W	HSH155	0.0271	0.4226	0.0641268	0.0726	1.1651	0.0623122
	YER143W	DDI1	0.0271	0.4005	0.0676654	0.0735	1.0463	0.0702475
	YEL029C	BUD16	0.0272	0.2121	0.128241	0.0432	1.0461	0.0412962
	YPR137W	RRP9	0.0272	0.3669	0.0741346	0.05	2.3097	0.0216478
	YNR041C	COQ2	0.0272	0.3534	0.0769666	0.0538	1.0029	0.0536444
	YLR451W	LEU3	0.0272	0.3453	0.0787721	0.0683	1.0016	0.0681909
	YHR185C	PFS1	0.0272	0.339	0.080236	0.069	0.7717	0.089413
	YLL012W	YEH1	0.0272	0.3701	0.0734937	0.0767	1.8094	0.0423897
	YLR362W	STE11	0.0273	0.3637	0.0750619	0.046	1.9076	0.0241141
	YGR008C	STF2	0.0273	0.5311	0.0514027	0.0488	0.7996	0.0610305
	YOR340C	RPA43	0.0273	0.2052	0.133041	0.0506	0.7794	0.0649217
	YJL074C	SMC3	0.0273	0.4089	0.0667645	0.0608	1.5292	0.0397594
	YBR057C	MUM2	0.0273	0.226	0.120796	0.0776	0.8573	0.0905167
	YDR111C	ALT2	0.0273	0.4189	0.0651707	0.0866	1.0985	0.0788348
	YJL164C	TPK1	0.0274	0.411	0.0666667	0.0606	2.3593	0.0256856
	YJL154C	VPS35	0.0274	0.3174	0.0863264	0.0634	1.1187	0.0566729
	YFR055W	IRC7	0.0274	0.3861	0.0709661	0.082	2.0832	0.0393625
	YMR275C	BUL1	0.0274	0.3639	0.0752954	0.0844	1.0665	0.0791374
	YLR103C	CDC45	0.0275	0.3094	0.0888817	0.0555	1.5105	0.0367428
	YBR256C	RIB5	0.0275	0.5459	0.0503755	0.0702	1.4156	0.0495903
	YGL197W	MDS3	0.0275	0.4277	0.0642974	0.0813	1.1034	0.0736813
	YIL038C	NOT3	0.0275	0.4455	0.0617284	0.0817	1.2288	0.0664876
	YDR009W	GAL3	0.0275	0.4289	0.0641175	0.1079	1.2893	0.0836888
	YLR022C	SDO1	0.0276	0.2729	0.101136	0.0415	0.7036	0.0589824
	YEL044W	IES6	0.0276	0.5443	0.0507073	0.0664	1.9237	0.0345168
	YER169W	RPH1	0.0276	0.3978	0.0693816	0.0699	1.4693	0.0475737
	YAL039C	CYC3	0.0276	0.1987	0.138903	0.08	2.0836	0.0383951
	YKL146W	AVT3	0.0277	0.3721	0.0744424	0.0795	1.1503	0.0691124
	YPL215W	CBP3	0.0278	0.3438	0.080861	0.0647	0.9997	0.0647194
	YPR021C	AGC1	0.0278	0.3804	0.073081	0.075	1.0034	0.0747459
	YDR330W	UBX5	0.0278	0.275	0.101091	0.0871	1.2417	0.0701458
	YKL206C	ADD66	0.0278	0.3128	0.0888747	0.1118	1.1801	0.0947377
	YOL130W	ALR1	0.0278	0.4435	0.0626832	0.1155	1.7304	0.0667476
	YLR308W	CDA2	0.0278	0.3763	0.0738772	0.1239	3.6359	0.0340768
	YJR073C	OPI3	0.0279	0.2978	0.093687	0.0458	0.8426	0.0543556
	YJL010C	NOP9	0.0279	0.3324	0.083935	0.0569	1.0065	0.0565325
	YKL017C	HCS1	0.0279	0.3085	0.0904376	0.0575	1.297	0.0443331
	YHR178W	STB5	0.0279	0.3346	0.0833831	0.0642	2.1168	0.0303288
	YLR008C	PAM18	0.0279	0.4096	0.0681152	0.0706	1.5502	0.0455425
	YAL051W	OAF1	0.0279	0.4755	0.0586751	0.0761	1.2602	0.0603872
	YKR087C	OMA1	0.0279	0.4922	0.0566843	0.0781	3.1862	0.024512
	YPR192W	AQY1	0.0279	0.3085	0.0904376	0.0789	1.3262	0.0594933
	YCR095C	OCA4	0.0279	0.4179	0.0667624	0.0792	1.5585	0.0508181
	YER037W	PHM8	0.0279	0.2593	0.107597	0.0817	1.2707	0.0642953
	YMR276W	DSK2	0.028	0.3154	0.0887762	0.0592	1.3587	0.0435711
	YGL137W	SEC27	0.028	0.3437	0.0814664	0.0624	1.3114	0.0475827
	YGL016W	KAP122	0.028	0.3068	0.0912647	0.0752	0.7286	0.103212
	YGL186C	TPN1	0.0281	0.4042	0.06952	0.0548	1.6943	0.0323437
	YHR090C	YNG2	0.0281	0.3843	0.07312	0.0553	0.7708	0.0717436
	YDR098C	GRX3	0.0281	0.446	0.0630045	0.06	1.1484	0.0522466
	YKL022C	CDC16	0.0281	0.401	0.0700748	0.0604	1.2771	0.0472947
	YDR034C	LYS14	0.0281	0.3941	0.0713017	0.0628	1.5475	0.0405816
	YOR145C	PNO1	0.0281	0.3187	0.0881707	0.0661	0.7602	0.0869508
	YNR047W		0.0281	0.4306	0.0652578	0.0828	2.591	0.0319568
	YCR048W	ARE1	0.0281	0.4276	0.0657156	1.3525	2.8942	0.467314
	YNL112W	DBP2	0.0282	0.516	0.0546512	0.0316	1.1744	0.0269074
	YMR096W	SNZ1	0.0282	0.3651	0.0772391	0.053	1.6105	0.032909
	YIL034C	CAP2	0.0282	0.2362	0.11939	0.0553	1.0338	0.053492
	YNL151C	RPC31	0.0282	0.4424	0.0637432	0.066	1.8231	0.0362021
	YDR167W	TAF10	0.0282	0.285	0.0989474	0.0686	1.1643	0.0589195
	YKL039W	PTM1	0.0282	0.2775	0.101622	0.07	0.9807	0.0713776
	YOL093W	TRM10	0.0282	0.3596	0.0784205	0.077	0.9775	0.0787724
	YCR028C	FEN2	0.0282	0.4236	0.0665722	0.0807	2.0139	0.0400715
	YLR260W	LCB5	0.0282	0.4573	0.0616663	0.0865	2.1224	0.0407557
	YJL027C		0.0282	0.0385	0.732468	0.5487	0.9307	0.589556
	YOR165W	SEY1	0.0283	0.348	0.0813218	0.0398	1.1707	0.0339968
	YIL042C	PKP1	0.0283	0.3324	0.0851384	0.0616	2.0718	0.0297326
	YDR067C	OCA6	0.0283	0.5677	0.0498503	0.0706	0.849	0.0831567
	YPL098C	MGR2	0.0283	0.2404	0.11772	0.0722	0.6278	0.115005
	YKR088C	TVP38	0.0283	0.3432	0.0824592	0.0732	1.1019	0.0664307
	YDL234C	GYP7	0.0283	0.2648	0.106873	0.0739	1.4138	0.0522705
	YJL183W	MNN11	0.0283	0.3165	0.0894155	0.0751	1.139	0.065935
	YDL018C	ERP3	0.0283	0.3362	0.0841761	0.0793	0.7886	0.100558
	YPR154W	PIN3	0.0283	0.3919	0.0722123	0.0938	1.8046	0.0519783
	YPL095C	EEB1	0.0283	0.3686	0.076777	0.1027	1.1833	0.0867912
	YDR496C	PUF6	0.0284	0.3277	0.0866646	0.0576	1.1062	0.0520702
	YBR176W	ECM31	0.0284	0.4459	0.0636914	0.0783	1.2786	0.0612389
	YHR115C	DMA1	0.0284	0.2377	0.119478	0.0823	1.0464	0.0786506
	YAL017W	PSK1	0.0284	0.3766	0.0754116	0.0828	1.4683	0.0563917
	YBL018C	POP8	0.0284	0.1977	0.143652	0.1355	0.7752	0.174794
	YJL208C	NUC1	0.0285	0.4524	0.0629973	0.0636	0.8916	0.0713324
	YOR160W	MTR10	0.0285	0.3769	0.0756169	0.0673	1.1416	0.0589523
	YBR169C	SSE2	0.0285	0.5345	0.0533209	0.0676	1.1989	0.056385
	YFR031C	SMC2	0.0285	0.329	0.0866261	0.0683	1.281	0.0533177
	YGR002C	SWC4	0.0285	0.4006	0.0711433	0.0759	1.1737	0.0646673
	YHL029C	OCA5	0.0285	0.3102	0.0918762	0.0793	1.2032	0.0659076
	YNR060W	FRE4	0.0285	0.2596	0.109784	0.0805	1.1996	0.0671057
	YDR142C	PEX7	0.0285	0.4815	0.05919	0.0904	1.1097	0.0814635
	YJR126C	VPS70	0.0285	0.3372	0.0845196	0.0939	1.3868	0.0677098
	YOL066C	RIB2	0.0286	0.4767	0.0599958	0.0607	1.5672	0.0387315
	YIL076W	SEC28	0.0286	0.2968	0.0963612	0.0669	0.7501	0.0891881
	YDR468C	TLG1	0.0286	0.4042	0.0707571	0.0681	0.8905	0.0764739
	YER046W	SPO73	0.0286	0.4665	0.0613076	0.104	1.5424	0.0674274
	YDR489W	SLD5	0.0287	0.3652	0.0785871	0.0639	1.1019	0.0579907
	YBR173C	UMP1	0.0287	0.2541	0.112948	0.0658	0.9305	0.0707147
	YPL043W	NOP4	0.0287	0.3722	0.0771091	0.069	1.8719	0.0368609
	YIR023W	DAL81	0.0287	0.3591	0.079922	0.0786	1.1702	0.067168
	YKL025C	PAN3	0.0287	0.2859	0.100385	0.084	0.8397	0.100036
	YNL160W	YGP1	0.0287	0.3231	0.088827	0.1002	0.7452	0.134461
	YOR384W	FRE5	0.0287	0.2399	0.119633	0.1355	0.8805	0.15389
	YDL157C		0.0288	0.2098	0.137274	0.0481	0.6662	0.0722005
	YJL159W	HSP150	0.0288	0.378	0.0761905	0.0561	0.5897	0.0951331
	YMR076C	PDS5	0.0288	0.3893	0.0739789	0.0607	1.5186	0.039971
	YCL064C	CHA1	0.0288	0.4459	0.0645885	0.0846	1.2868	0.0657445
	YLR407W		0.0288	0.4664	0.0617496	0.0901	1.1175	0.0806264
	YDL212W	SHR3	0.0288	0.4053	0.0710585	0.0912	2.3442	0.0389045
	YOR363C	PIP2	0.0288	0.4176	0.0689655	0.0989	1.0663	0.0927506
	YER141W	COX15	0.0289	0.3907	0.0739698	0.0389	0.8905	0.0436833
	YHR066W	SSF1	0.0289	0.3544	0.0815463	0.0507	1.2001	0.0422465
	YDR503C	LPP1	0.0289	0.4448	0.064973	0.0615	0.9914	0.0620335
	YGL195W	GCN1	0.0289	0.3729	0.0775007	0.0671	1.1731	0.0571989
	YGL144C	ROG1	0.0289	0.4133	0.069925	0.0713	3.8778	0.0183867
	YNL163C	RIA1	0.0289	0.3741	0.0772521	0.076	1.3816	0.0550087
	YMR208W	ERG12	0.0289	0.4971	0.0581372	0.08	1.1766	0.0679925
	YML058W	SML1	0.029	0.2683	0.108088	0.0511	1.0999	0.0464588
	YOR209C	NPT1	0.029	0.4323	0.067083	0.0719	1.0652	0.0674991
	YDR231C	COX20	0.029	0.2867	0.101151	0.0769	2.1072	0.0364939
	YOR311C	HSD1	0.029	0.2759	0.105111	0.0839	1.2372	0.0678144
	YIL003W	CFD1	0.0291	0.3564	0.0816498	0.0493	0.9502	0.0518838
	YLR285W	NNT1	0.0291	0.3871	0.0751744	0.0576	1.3623	0.0422814
	YBL105C	PKC1	0.0291	0.414	0.0702899	0.0577	1.9876	0.02903
	YNL153C	GIM3	0.0291	0.2307	0.126138	0.068	2.0701	0.0328487
	YML072C	TCB3	0.0291	0.3783	0.0769231	0.0731	0.9617	0.0760112
	YDL060W	TSR1	0.0291	0.4152	0.0700867	0.0766	0.7895	0.0970234
	YGR058W	PEF1	0.0291	0.4217	0.0690064	0.0854	1.1583	0.0737287
	YNL264C	PDR17	0.0292	0.3223	0.0905988	0.044	1.8292	0.0240542
	YEL002C	WBP1	0.0292	0.3179	0.0918528	0.0799	0.7881	0.101383
	YIR010W	DSN1	0.0292	0.2774	0.105263	0.0939	0.7897	0.118906
	YML116W	ATR1	0.0292	0.417	0.070024	0.1004	1.2871	0.0780048
	YNL131W	TOM22	0.0292	0.3052	0.095675	0.8679	2.4244	0.357985
	YDR403W	DIT1	0.0293	0.3353	0.0873844	0.0493	1.693	0.0291199
	YPR163C	TIF3	0.0293	0.4167	0.0703144	0.0527	0.9201	0.0572764
	YKL065C	YET1	0.0293	0.2015	0.145409	0.0581	1.329	0.0437171
	YLR002C	NOC3	0.0294	0.3208	0.0916459	0.0681	0.893	0.0762598
	YEL061C	CIN8	0.0294	0.3581	0.0821	0.0692	0.9535	0.0725747
	YJL196C	ELO1	0.0294	0.2642	0.111279	0.1576	1.074	0.146741
	YLR251W	SYM1	0.0295	0.3287	0.0897475	0.0572	0.7978	0.0716972
	YBR244W	GPX2	0.0295	0.332	0.0888554	0.0635	1.2044	0.0527233
	YDL113C	ATG20	0.0295	0.3118	0.0946119	0.0767	1.1804	0.064978
	YDR191W	HST4	0.0295	0.3779	0.078063	0.079	1.4168	0.0557595
	YAL022C	FUN26	0.0295	0.3921	0.0752359	0.0895	2.3567	0.0379768
	YOR004W	UTP23	0.0295	0.2478	0.119048	0.0954	0.7941	0.120136
	YER020W	GPA2	0.0295	0.4046	0.0729115	0.0962	1.5941	0.0603475
	YDL218W		0.0295	0.4392	0.0671676	0.127	1.6008	0.0793353
	YPR022C		0.0295	0.4344	0.0679098	0.155	1.2791	0.121179
	YMR012W	CLU1	0.0296	0.3561	0.0831227	0.0655	1.0263	0.0638215
	YGR274C	TAF1	0.0296	0.4216	0.0702087	0.0728	1.155	0.0630303
	YKL176C	LST4	0.0296	0.4164	0.0710855	0.0861	1.2187	0.0706491
	YOR194C	TOA1	0.0296	0.3343	0.0885432	0.1154	0.8391	0.137528
	YLR433C	CNA1	0.0297	0.2956	0.100474	0.0567	1.3784	0.0411346
	YJR132W	NMD5	0.0297	0.3285	0.090411	0.0636	1.0037	0.0633655
	YOR306C	MCH5	0.0297	0.4481	0.0662798	0.0668	2.8072	0.023796
	YJL109C	UTP10	0.0297	0.3332	0.0891357	0.0687	1.3369	0.0513875
	YKL027W		0.0297	0.3456	0.0859375	0.0754	1.0182	0.0740522
	YJR138W	IML1	0.0297	0.3652	0.0813253	0.0761	1.4041	0.0541984
	YIL135C	VHS2	0.0297	0.2732	0.108712	0.0854	0.7443	0.114739
	YJL030W	MAD2	0.0298	0.2829	0.105338	0.0445	1.1782	0.0377695
	YGR246C	BRF1	0.0298	0.4352	0.0684743	0.0516	1.0875	0.0474483
	YOR243C	PUS7	0.0298	0.3556	0.083802	0.0654	1.2519	0.0522406
	YKL167C	MRP49	0.0298	0.4279	0.0696424	0.0835	1.9444	0.0429438
	YHR084W	STE12	0.0298	0.4067	0.0732727	0.0885	1.0934	0.0809402
	YBL086C		0.0298	0.4234	0.0703826	0.1115	1.5396	0.0724214
	YGR287C		0.0299	0.4597	0.0650424	0.0473	1.2481	0.0378976
	YPL173W	MRPL40	0.0299	0.2639	0.1133	0.0646	1.3193	0.0489654
	YDR255C	RMD5	0.0299	0.2721	0.109886	0.0663	1.0608	0.0625
	YIL124W	AYR1	0.0299	0.5207	0.0574227	0.0822	1.1753	0.0699396
	YMR188C	MRPS17	0.0299	0.4323	0.0691649	0.0828	1.7142	0.0483024
	YPL254W	HFI1	0.0299	0.4965	0.0602216	0.0871	1.0491	0.0830235
	YDR235W	PRP42	0.0299	0.3033	0.0985823	0.1005	0.8641	0.116306
	YMR092C	AIP1	0.0299	0.4327	0.069101	0.1075	1.1042	0.0973556
	YLR026C	SED5	0.03	0.3615	0.0829876	0.0499	0.9838	0.0507217
	YKL137W	CMC1	0.03	0.4016	0.0747012	0.0607	0.7006	0.08664
	YPL063W	TIM50	0.03	0.3379	0.0887837	0.0732	1.167	0.0627249
	YMR239C	RNT1	0.03	0.3897	0.0769823	0.0809	0.9813	0.0824417
	YJL156C	SSY5	0.03	0.4029	0.0744602	0.0865	1.6873	0.0512653
	YNL197C	WHI3	0.03	0.418	0.0717703	0.0871	1.5087	0.0577318
	YDL048C	STP4	0.03	0.3938	0.0761808	0.1063	1.2848	0.0827366
	YHR041C	SRB2	0.03	0.4878	0.0615006	1.2522	2.9242	0.42822
	YIL133C	RPL16A	0.0301	0.1807	0.166574	0.0207	0.3485	0.0593974
	YCL031C	RRP7	0.0301	0.2562	0.117486	0.0391	0.6838	0.0571805
	YLR395C	COX8	0.0301	0.1219	0.246924	0.0471	0.7719	0.0610183
	YPL172C	COX10	0.0301	0.3961	0.0759909	0.0664	1.4893	0.0445847
	YOR036W	PEP12	0.0301	0.3883	0.0775174	0.0695	1.0894	0.0637966
	YHR073W	OSH3	0.0301	0.4064	0.074065	0.0709	1.4894	0.0476031
	YKR030W	GMH1	0.0301	0.3247	0.092701	0.0777	0.7372	0.105399
	YLR248W	RCK2	0.0301	0.3105	0.0969404	0.0778	0.9979	0.0779637
	YFR048W	RMD8	0.0301	0.3682	0.081749	0.0853	2.6259	0.0324841
	YOL096C	COQ3	0.0301	0.4123	0.0730051	0.1006	1.2625	0.0796832
	YML074C	FPR3	0.0302	0.32	0.094375	0.0535	0.9313	0.0574466
	YCR094W	CDC50	0.0302	0.3218	0.0938471	0.0818	1.8619	0.0439336
	YNL257C	SIP3	0.0302	0.3963	0.0762049	0.1024	1.1155	0.0917974
	YOR010C	TIR2	0.0302	0.3161	0.0955394	0.1996	1.4206	0.140504
	YPL119C	DBP1	0.0303	0.5212	0.0581351	0.0682	3.6882	0.0184914
	YHR108W	GGA2	0.0303	0.3665	0.0826739	0.0725	1.0162	0.0713442
	YBL011W	SCT1	0.0303	0.323	0.093808	0.0763	1.2915	0.0590786
	YCR046C	IMG1	0.0303	0.4418	0.0685831	0.0839	2.6512	0.031646
	YJL151C	SNA3	0.0303	0.4451	0.0680746	0.1117	3.3304	0.0335395
	YPL059W	GRX5	0.0304	0.3171	0.0958688	0.0514	0.7903	0.0650386
	YMR169C	ALD3	0.0304	0.5807	0.0523506	0.0685	2.5839	0.0265103
	YLR420W	URA4	0.0304	0.3111	0.0977178	0.0731	1.4443	0.0506128
	YKL129C	MYO3	0.0304	0.4127	0.0736613	0.0784	2.6968	0.0290715
	YBL025W	RRN10	0.0304	0.319	0.0952978	0.0905	1.1222	0.0806452
	YNL246W	VPS75	0.0305	0.37	0.0824324	0.0583	1.0153	0.0574215
	YHR031C	RRM3	0.0305	0.374	0.0815508	0.06	1.0223	0.0586912
	YJR159W	SOR1	0.0305	0.3864	0.0789337	0.0658	1.492	0.0441019
	YLR310C	CDC25	0.0305	0.3873	0.0787503	0.0768	1.0346	0.0742316
	YPL127C	HHO1	0.0305	0.2453	0.124338	0.079	1.1	0.0718182
	YNR015W	SMM1	0.0305	0.3185	0.0957614	0.0818	1.7776	0.0460171
	YPL214C	THI6	0.0306	0.4572	0.0669291	0.0583	1.524	0.0382546
	YBR159W	IFA38	0.0306	0.3937	0.0777242	0.0608	0.9394	0.0647222
	YBR195C	MSI1	0.0306	0.327	0.093578	0.0635	0.6395	0.0992963
	YBL038W	MRPL16	0.0306	0.3614	0.0846707	0.0675	2.9457	0.0229148
	YML080W	DUS1	0.0306	0.426	0.071831	0.0693	1.0295	0.0673142
	YKL024C	URA6	0.0306	0.4585	0.0667394	0.0737	1.0401	0.0708586
	YFR045W		0.0306	0.4594	0.0666086	0.0747	1.098	0.0680328
	YJL149W		0.0306	0.3825	0.08	0.0766	0.7275	0.105292
	YDR055W	PST1	0.0306	0.3396	0.090106	0.0823	1.1542	0.0713048
	YDR003W	RCR2	0.0306	0.3073	0.099577	0.1317	1.0567	0.124633
	YKL021C	MAK11	0.0307	0.3982	0.0770969	0.0593	3.055	0.0194108
	YIL020C	HIS6	0.0307	0.3346	0.0917513	0.0647	1.7973	0.0359984
	YNL298W	CLA4	0.0307	0.3427	0.0895827	0.067	2.3559	0.0284392
	YDR398W	UTP5	0.0307	0.3174	0.0967234	0.0742	0.8128	0.0912894
	YDR462W	MRPL28	0.0307	0.3366	0.0912062	0.0818	1.3412	0.0609902
	YNL180C	RHO5	0.0307	0.2523	0.121681	0.127	1.1204	0.113352
	YAR008W	SEN34	0.0307	0.2574	0.11927	0.1274	1.5927	0.07999
	YCR020W-B	HTL1	0.0307	0.2357	0.13025	0.1575	0.6096	0.258366
	YGR165W	MRPS35	0.0308	0.3166	0.0972836	0.0511	0.9291	0.0549995
	YLR085C	ARP6	0.0308	0.3501	0.0879749	0.0684	1.4744	0.0463918
[truncated: 2,302 more rows]

## Sheet: Functional Cat. Table 1
	Manually assembled functional categories of genes referred in Table 1, based either on SGD gene descriptions (Cell Wall Mannoproteins, Ribosomal Stalk, Translation Elongation Factors)
	or as in Conant & Wolfe 2007 (Glycolysis).
		Legend:
			accelerated gene
			non accelerated gene
			gene absent from our analysis
			dS values>1
		Cell Wall Mannoproteins
		Gene	dS Suva/Scer	Gene description
		CCW12	0.188	Cell wall mannoprotein with a role in maintenance of newly synthesized areas of cell wall; localizes to periphery of small buds, septum region of larger buds, and shmoo tip
		CWP1	1.1267	Cell wall mannoprotein that localizes specifically to birth scars of daughter cells, linked to a beta-1,3- and beta-1,6-glucan heteropolymer through a phosphodiester bond; required for propionic acid resistance
		CWP2	0.3124	Covalently linked cell wall mannoprotein, major constituent of the cell wall; plays a role in stabilizing the cell wall; involved in low pH resistance; precursor is GPI-anchored
		DAN1
		DAN4
		FIT 1
		FIT2	0.5212	Mannoprotein that is incorporated into the cell wall via a glycosylphosphatidylinositol (GPI) anchor, involved in the retention of siderophore-iron in the cell wall
		FIT3	0.7304	Mannoprotein that is incorporated into the cell wall via a glycosylphosphatidylinositol (GPI) anchor, involved in the retention of siderophore-iron in the cell wall
		PAU23
		PAU24
		TIP1
		TIR1	0.5618	Cell wall mannoprotein of the Srp1p/Tip1p family of serine-alanine-rich proteins; expression is downregulated at acidic pH and induced by cold shock and anaerobiosis; abundance is increased in cells cultured without shaking
		TIR2	1.4206	Putative cell wall mannoprotein of the Srp1p/Tip1p family of serine-alanine-rich proteins; transcription is induced by cold shock and anaerobiosis
		TIR3	0.7058
		TIR4	1.0785	Cell wall mannoprotein of the Srp1p/Tip1p family of serine-alanine-rich proteins; expressed under anaerobic conditions and required for anaerobic growth; transcription is also induced by cold shock
		Glycolysis
		Gene	dS Suva/Scer	Gene description
		HXK1	0.9899	Hexokinase isoenzyme 1, a cytosolic protein that catalyzes phosphorylation of glucose during glucose metabolism; expression is highest during growth on non-glucose carbon sources; glucose-induced repression involves the hexokinase Hxk2p
		HXK2	0.5413	Hexokinase isoenzyme 2 that catalyzes phosphorylation of glucose in the cytosol; predominant hexokinase during growth on glucose; functions in the nucleus to repress expression of HXK1 and GLK1 and to induce expression of its own gene
		GLK1	4.368	Glucokinase, catalyzes the phosphorylation of glucose at C6 in the first irreversible step of glucose metabolism; one of three glucose phosphorylating enzymes; expression regulated by non-fermentable carbon sources
		PGI1	0.6799	Glycolytic enzyme phosphoglucose isomerase, catalyzes the interconversion of glucose-6-phosphate and fructose-6-phosphate; required for cell cycle progression and completion of the gluconeogenic events of sporulation
		PFK1	1.0403	Alpha subunit of heterooctameric phosphofructokinase involved in glycolysis, indispensable for anaerobic growth, activated by fructose-2,6-bisphosphate and AMP, mutation inhibits glucose induction of cell cycle-related genes
		PFK2	0.569	Beta subunit of heterooctameric phosphofructokinase involved in glycolysis, indispensable for anaerobic growth, activated by fructose-2,6-bisphosphate and AMP, mutation inhibits glucose induction of cell cycle-related genes
		FBA1	0.117	Fructose 1,6-bisphosphate aldolase, required for glycolysis and gluconeogenesis; catalyzes conversion of fructose 1,6 bisphosphate to glyceraldehyde-3-P and dihydroxyacetone-P; locates to mitochondrial outer surface upon oxidative stress
		TPI1
		TDH1	0.294	Glyceraldehyde-3-phosphate dehydrogenase, isozyme 1, involved in glycolysis and gluconeogenesis; tetramer that catalyzes the reaction of glyceraldehyde-3-phosphate to 1,3 bis-phosphoglycerate; detected in the cytoplasm and cell wall
		TDH2
		TDH3
		PGK1	0.14	3-phosphoglycerate kinase, catalyzes transfer of high-energy phosphoryl groups from the acyl phosphate of 1,3-bisphosphoglycerate to ADP to produce ATP; key enzyme in glycolysis and gluconeogenesis
		GPM1	0.1611	Tetrameric phosphoglycerate mutase, mediates the conversion of 3-phosphoglycerate to 2-phosphoglycerate during glycolysis and the reverse reaction during gluconeogenesis
		ENO1	0.2866	Enolase I, a phosphopyruvate hydratase that catalyzes the conversion of 2-phosphoglycerate to phosphoenolpyruvate during glycolysis and the reverse reaction during gluconeogenesis; expression is repressed in response to glucose
		ENO2	0.2137	Enolase II, a phosphopyruvate hydratase that catalyzes the conversion of 2-phosphoglycerate to phosphoenolpyruvate during glycolysis and the reverse reaction during gluconeogenesis; expression is induced in response to glucose
		CDC19	0.1465	Pyruvate kinase, functions as a homotetramer in glycolysis to convert phosphoenolpyruvate to pyruvate, the input for aerobic (TCA cycle) or anaerobic (glucose fermentation) respiration
		PYK2	1.6992	Pyruvate kinase that appears to be modulated by phosphorylation; PYK2 transcription is repressed by glucose, and Pyk2p may be active under low glycolytic flux
		Ribosomal stalk+Translation elongation factors
		Gene	dS Suva/Scer	Gene description
		ANB1	0.3765	Translation elongation factor eIF-5A, previously thought to function in translation initiation; similar to and functionally redundant with Hyp2p; undergoes an essential hypusination modification; expressed under anaerobic conditions
		HEF3	1.4829	Translational elongation factor EF-3; paralog of YEF3 and member of the ABC superfamily; stimulates EF-1 alpha-dependent binding of aminoacyl-tRNA by the ribosome; normally expressed in zinc deficient cells
		HYP2	0.3542	Translation elongation factor eIF-5A that may function in translation initiation; similar to and functionally redundant with Anb1p; structural homolog of bacterial EF-P; undergoes an essential hypusination modification
		RPP0	0.2745	Conserved ribosomal protein P0 of the ribosomal stalk, which is involved in interaction between translational elongation factors and the ribosome; similar to rat P0, human P0, and E. coli L10e; phosphorylated on serine 302
		RPP1A	0.2722	Ribosomal stalk protein P1 alpha, involved in the interaction between translational elongation factors and the ribosome; accumulation of P1 in the cytoplasm is regulated by phosphorylation and interaction with the P2 stalk component
		RPP1B
		RPP2A	0.1632	Ribosomal protein P2 alpha, a component of the ribosomal stalk, which is involved in the interaction between translational elongation factors and the ribosome; regulates the accumulation of P1 (Rpp1Ap and Rpp1Bp) in the cytoplasm
		RPP2B	0.0918	Ribosomal protein P2 beta, a component of the ribosomal stalk, which is involved in the interaction between translational elongation factors and the ribosome; regulates the accumulation of P1 (Rpp1Ap and Rpp1Bp) in the cytoplasm
		TEF1
		TEF2
		TEF4
		YEF3	0.3043	Gamma subunit of translational elongation factor eEF1B, stimulates the binding of aminoacyl-tRNA (AA-tRNA) to ribosomes by releasing eEF1A (Tef1p/Tef2p) from the ribosomal complex; contains two ABC cassettes; binds and hydrolyzes ATP
